# Supplementary material for: The impact of chronic kidney disease and cardiovascular comorbidity on mortality in a multiethnic population: a retrospective cohort study
Source: PubMed Central journal article supplement — BMJ Open. 2013 Dec 3;3(12):e003458. doi: 10.1136/bmjopen-2013-003458 (PMC3855607; doi:10.1136/bmjopen-2013-003458), 2013-12-03
Supplement: bmjopen-2013-003458.draft_revisions.pdf [file bmjopen-2013-003458.draft_revisions.pdf]

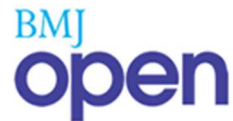

**The impact of chronic kidney disease and cardiovascular comorbidity on mortality in a multi-ethnic population**

|                                 |                                                                                                                                                                                                                                                                                                                                                                                                                           |
|---------------------------------|---------------------------------------------------------------------------------------------------------------------------------------------------------------------------------------------------------------------------------------------------------------------------------------------------------------------------------------------------------------------------------------------------------------------------|
| Journal:                        | <i>BMJ Open</i>                                                                                                                                                                                                                                                                                                                                                                                                           |
| Manuscript ID:                  | bmjopen-2013-003458                                                                                                                                                                                                                                                                                                                                                                                                       |
| Article Type:                   | Research                                                                                                                                                                                                                                                                                                                                                                                                                  |
| Date Submitted by the Author:   | 21-Jun-2013                                                                                                                                                                                                                                                                                                                                                                                                               |
| Complete List of Authors:       | Jesky, Mark; Queen Elizabeth Hospital Birmingham, Department of Renal Medicine; University of Birmingham, Division of Infection and Immunity<br>Lambert, Amanda; Birmingham City Council, Public Health Intelligence<br>Burden, AC Felix; NHS Birmingham and Solihull,<br>Cockwell, Paul; Queen Elizabeth Hospital Birmingham, Department of Renal Medicine; University of Birmingham, Division of Infection and Immunity |
| <b>Primary Subject Heading</b>: | Epidemiology                                                                                                                                                                                                                                                                                                                                                                                                              |
| Secondary Subject Heading:      | Renal medicine, Cardiovascular medicine, General practice / Family practice                                                                                                                                                                                                                                                                                                                                               |
| Keywords:                       | Chronic renal failure < NEPHROLOGY, EPIDEMIOLOGY, PRIMARY CARE                                                                                                                                                                                                                                                                                                                                                            |
|                                 |                                                                                                                                                                                                                                                                                                                                                                                                                           |

SCHOLARONE™  
Manuscripts

Impact of CKD and comorbidity on mortality in a multi-ethnic population.

1  
2  
3 **The impact of chronic kidney disease and cardiovascular comorbidity on mortality in a multi-**  
4 **ethnic population**  
5  
6  
7

8  
9 **Mark Jesky<sup>1,2</sup>, Amanda Lambert<sup>3</sup>, AC Felix Burden<sup>4</sup>, Paul Cockwell<sup>1,2</sup>**  
10

- 11 **1. Department of Renal Medicine, Queen Elizabeth Hospital Birmingham, UK**
  - 12 **2. Division of Infection and Immunity, University of Birmingham, UK**
  - 13 **3. Public Health Intelligence, Birmingham City Council, UK**
  - 14 **4. Sandwell and West Birmingham Clinical Commissioning Group, UK**
- 15  
16  
17  
18  
19

20 **Corresponding Author**  
21

22 Dr. Mark Jesky  
23 Department of Renal Medicine,  
24 Queen Elizabeth Hospital Birmingham,  
25 Mindelsohn Way,  
26 Edgbaston,  
27 Birmingham,  
28 B15 2WB  
29 UK

30 Tel: 00 44 121 371 5852  
31 Fax: 00 44 121 371 5858  
32 Email: mark.jesky@uhb.nhs.uk  
33

34  
35 **Key Words**  
36

37 Chronic Kidney Disease, Comorbidity, Epidemiology, Ethnicity  
38

39 **Word Count (excluding title page, abstract, references, figures and tables)**  
40

41 3,309 words  
42  
43  
44  
45  
46  
47  
48  
49  
50  
51  
52  
53  
54  
55  
56  
57  
58  
59  
60

Impact of CKD and comorbidity on mortality in a multi-ethnic population.

## Abstract

**Objective:** To assess the impact of chronic kidney disease (CKD) and cardiovascular comorbidity on mortality in a multi-ethnic primary care population.

**Design:** Retrospective, observational cohort study.

**Setting:** Inner-city primary care trust in West Midlands, United Kingdom.

**Participants:** Individuals aged 40 years and older, of South Asian, black or white ethnicity, registered with a general practice and with their kidney function checked within the last 12 months.

**Outcome Measure:** All-cause mortality.

**Results:** Reduced estimated Glomerular Filtration Rate, higher albuminuria, older age, white ethnicity (versus South-Asian or black ethnicity) and increasing cardiovascular comorbidities were independent determinants of a higher mortality risk. In the multivariate model including comorbidities and kidney function, the hazard ratio for mortality for South Asians was 0.697 (95% confidence interval (CI) 0.56 – 0.868,  $p=0.001$ ) and for blacks was 0.533 (95% CI 0.403 – 0.704,  $p<0.001$ ) compared to whites.

**Conclusions:** The hazard ratio for death is lower for South Asian and black individuals compared to white individuals. This is, in part, independent of age, gender, socio-economic status, kidney function and comorbidities. Risk of death is higher in individuals with CKD and with a higher cumulative cardiovascular comorbidity.

## Article summary

- Article focus
  - Retrospective, primary care based cohort study
  - Investigating relationship between ethnicity and cardiovascular comorbidity
  - Inner city population with high deprivation
- Key messages
  - Renal function (both eGFR and ACR) conveys prognostic significance
  - Cumulative comorbidity score can be used to risk stratify
  - Hazard ratio for death is lower for South Asian and black individuals compared to white individuals
- Strengths and limitations of this study
  - Sample size with inclusion of many practices
  - Ethnicity data well recorded (>80%)
  - Primary care based, looking at multiple cardiovascular comorbidities

Impact of CKD and comorbidity on mortality in a multi-ethnic population.

## Introduction

Chronic kidney disease (CKD) is a risk factor for increased mortality <sup>1</sup>, with an increased risk of death associated with both declining excretory renal function and albuminuria <sup>2-4</sup>. CKD prevalence and the risk imparted by CKD may vary by ethnicity; for example, some studies indicate that CKD is more common in people of white ethnicity <sup>5 6</sup> but non-white ethnic groups have a faster progression to end-stage kidney disease <sup>7 8</sup>. Paradoxically, when treated with chronic dialysis treatment, people of non-white ethnicity have a lower mortality risk than people of white ethnicity <sup>9 10</sup>. An increased risk of death is also associated with other comorbidities, including hypertension, diabetes and cardiovascular disease (CVD) <sup>11-16</sup>.

Whilst previous studies have indicated survival differences between ethnic groups <sup>8 17-21</sup>, there has been limited reporting in these studies on the relative impact of comorbidities including kidney function on a population basis. This paucity of data reflects a shortfall in the availability of population based primary care databases linked to estimated Glomerular Filtration Rate (eGFR) and albuminuria reporting and traceable to mortality. Furthermore there is minimal comparative data on people of South Asian ethnicity; comparative studies usually report data on Chinese-Asians <sup>5</sup>.

In the United Kingdom, there has been a systematic improvement in chronic disease recognition through a primary care pay for performance system, the Quality and Outcomes Framework (QOF) <sup>22 23</sup>. This system utilises chronic disease registers for the identification, monitoring and management of patients with known comorbidities; these disease registers can be combined with laboratory results and linked with demographic and mortality data to better identify determinants of outcomes.

We have therefore utilised chronic disease registers to perform a retrospective cohort study of the relationship between CKD, cardiovascular comorbidity and mortality within a deprived, inner-city multi-ethnic population. This study incorporated all stages of kidney function (except those with an eGFR below 15ml/min/1.73m<sup>2</sup>) in patients with known CV comorbidities and focused on three ethnic groups: South Asian (including individuals of Bangladeshi, Indian and Pakistani descent), black (individuals from or who have ancestors from Africa or the Caribbean) and white.

## Methods

**Ethics:** The data was fully anonymised and was available as a component of an on-going clinical development programme. The responsible NHS R&D Consortium stated that this study did not require ethical submission to an NHS research ethics committee as it represented an evaluation of part an on-going primary care trust (PCT) programme. For PCT data extraction the PCT professional executive committee and GP locality leads provided approval for the programme, including evaluation and publication.

**Cohort identification:** The cohort was derived from Heart of Birmingham (Teaching) Primary Care Trust (HoB PCT) which had a registered population of 312,070 (September 2008). The majority of the

Impact of CKD and comorbidity on mortality in a multi-ethnic population.

population (62%) were non-white<sup>24</sup>. Data were collected centrally, utilising software able to identify comorbidities through their classification on chronic disease registers [Enhanced Healthcare Services, Essex, UK]. Complete sets of anonymised data were available for 63 out of 73 general practices within HoB PCT comprising a population of 285,221 and these were extracted from electronic downloads. **Figure 1** illustrates the selection process for inclusion in the study.

Figure 1. Flow Diagram indicating selection process for inclusion in the analyses

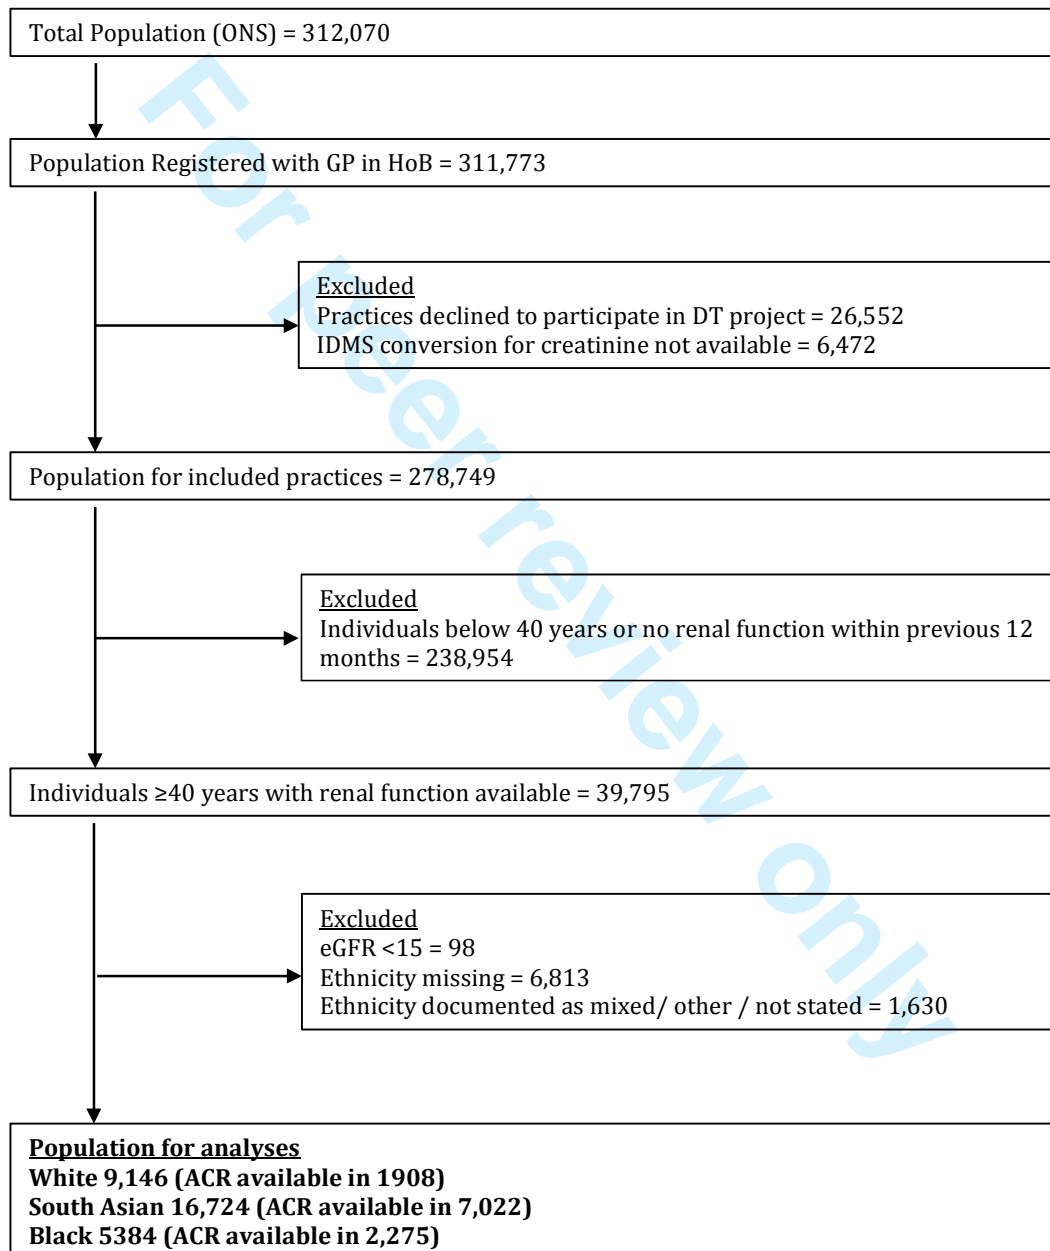

Impact of CKD and comorbidity on mortality in a multi-ethnic population.

1  
2  
3 The inclusion criteria comprised individuals aged 40 years and over whom had kidney function testing  
4 performed within the previous 12 months. Data for the following variables were collected: age, gender,  
5 ethnicity (self-reported), current smoking status, socio-economic status (SES), eGFR and/or creatinine,  
6 urinary albumin:creatinine ratio (ACR) and vascular comorbidity (atrial fibrillation, chronic kidney  
7 disease, diabetes mellitus, heart failure, hypertension, ischaemic heart disease and stroke) as defined by a  
8 relevant clinical (Read) code specified by the UK pay for performance (QOF) business rules <sup>25</sup>.  
9

10  
11 A standardised Isotope Dilution Mass Spectrometry (IDMS) eGFR was reported from one of three local  
12 biochemistry laboratories, however eGFR reporting was not universally recorded on primary care  
13 systems in 2008 and if this was not available the eGFR was calculated by utilising laboratory provided  
14 correction factors for the creatinine to generate IDMS traceable eGFR. One general practice in the  
15 catchment area was excluded as IDMS traceable creatinine was not available from a fourth laboratory  
16 that provided blood tests specifically for that catchment area.  
17

18  
19 Socio-economic status was assessed using the Index of Multiple Deprivation (IMD 2007 <sup>26</sup>); this utilises  
20 the postcode from an individual's address to identify the Lower Layer Super Output Area (LSOA) where  
21 the individual resides. Each of the 32,482 LSOAs in England are assigned a score and rank for the IMD  
22 2007, with lower ranks corresponding to the most deprived areas. The Index of Multiple Deprivation has  
23 been validated as superior to traditional deprivation indexes such as the Townsend score <sup>27</sup>, due to its use  
24 of multiple domains reflective of socioeconomic deprivation <sup>28</sup>. The IMD 2007 score incorporates seven  
25 areas of deprivation: income deprivation; employment deprivation; health deprivation and disability;  
26 education; skills and training deprivation; barriers to housing and services; living environment  
27 deprivation; and crime. For the analyses presented, deprivation was divided into national quintiles, with  
28 the most deprived quintile as the reference population (i.e. how mortality in less deprived quintiles  
29 compared to the most deprived quintile).  
30  
31

32  
33 Mortality data was obtained from the Primary Care Mortality Database <sup>29</sup>, a resource developed by The  
34 NHS Information Centre in partnership with the Office for National Statistics (ONS). Data obtained from  
35 ONS records is linked to the general practice where the individual was registered and therefore allows  
36 data to be extracted for specific general practices (i.e. those within HoB PCT). Individuals included in this  
37 analysis were either still registered with a HoB PCT GP at the end of the follow up period or had died  
38 whilst still registered at the practice. The follow up period was from May 2008 until February 2011.  
39

### 40 41 42 43 44 45 46 47 48 **Statistical Analyses**

49 All analyses were performed using PASW statistics 18 for Windows [IBM, Chicago, IL, USA].

50  
51 Measurements for kidney function were divided into categories; eGFR into six categories (15-29, 30-44,  
52 45-59, 60-89, 90-119 and >120 ml/min) with the eGFR range between 90 and 119 ml/min as the  
53 reference population. Individuals with an eGFR <15 ml/min were excluded from the analysis. ACR was  
54 divided into five categories (<1.1 mg/mmol 'optimal', 1.1-2.99 'high normal', 3-29.99 'high', 30-199.99  
55 'very high' and ≥200 'nephrotic') in line with the KDIGO consensus conference <sup>30</sup>.  
56  
57  
58  
59  
60

Impact of CKD and comorbidity on mortality in a multi-ethnic population.

1  
2  
3 The relationship between age and mortality was not linear. Therefore, age was divided into six categories  
4 (50 years and under, 51-60, 61-70, 71-80, 81-90, greater than 90 years) with the youngest group serving  
5 as comparator.  
6

7  
8 Descriptive statistics are presented as mean with standard deviation or median with interquartile range  
9 depending on distribution. Continuous variables were compared using ANOVA (normal distribution) with  
10 post-hoc Bonferroni analysis or Kruskal-Wallis (non-parametric distribution) tests. Chi-squared tests  
11 were used to compare categorical variables.  
12

13  
14 Cox regression survival analysis was used to evaluate the association of ethnicity and mortality, both  
15 before and after adjusting for covariates. Data are presented using survival plots, hazard ratios (HRs)  
16 with 95% confidence intervals (95% CI) and p-values. Both univariate (unadjusted) and multivariate  
17 (adjusted) regression analyses are presented.  
18  
19

20  
21 The association between comorbidity, ethnicity and mortality was assessed by univariate analyses for all  
22 risk factors and then presented as three models. Model 1 incorporates the number of identified vascular  
23 comorbidities (zero to seven), ethnicity, age, gender, smoking status and SES. Model 2 includes eGFR level  
24 with removal of CKD from the comorbidity score (possible scores therefore zero to six) in order to avoid  
25 the association between declining renal function and the likelihood of being on the CKD register. Model 3  
26 added ACR to the variables in Model 2.  
27  
28

29  
30 A complete case model was used in the analyses. All data were complete with the exception of ACR.  
31 Therefore data were analysed for all individuals identified (unadjusted, Model 1 and Model 2) and then  
32 repeated for individuals who had an ACR recorded (unadjusted and Models 1-3). An 'enter' technique was  
33 used for the regression analysis.  
34  
35

## 36 Results

### 37 Complete Cohort

38  
39 At inception (May 2008) 31,254 individuals fulfilled inclusion criteria for analysis. People of South Asians  
40 ethnicity formed the largest ethnic group (16,724, 53.4%), followed by people of white ethnicity (9146,  
41 29.3%) and black ethnicity (5384, 17.2%). Baseline characteristics of the study population are shown in  
42 **Table 1**. The age distribution differed between groups with South Asians significantly younger than the  
43 other two ethnic groups. There was no significant difference in gender between the three ethnic groups.  
44 Smoking was least common in the South Asian group. The majority of all three ethnic groups resided in  
45 the most deprived quintile, with a higher proportion of people of South Asian and black ethnicity in this  
46 quintile than people of white ethnicity.  
47  
48  
49  
50  
51  
52  
53  
54  
55  
56  
57  
58  
59  
60

Impact of CKD and comorbidity on mortality in a multi-ethnic population.

Table 1: Baseline characteristics by ethnicity. Complete Cohort.

|                      |                                        | All               | White             | South Asian       | Black              | p-value |
|----------------------|----------------------------------------|-------------------|-------------------|-------------------|--------------------|---------|
| <b>Number</b>        | <b>n (%)</b>                           | 31254 (100)       | 9146 (29.3)       | 16724 (53.4)      | 5384 (17.2)        |         |
| <b>Age</b>           | <b>median (lower, upper quartile)</b>  | 59.0 (50.0, 71.0) | 65.0 (55.0, 75.0) | 56.0 (49.0, 68.0) | 61.0 (48.0, 73.0)  | <0.001  |
|                      | <b>50 and under (%)</b>                | 8421 (26.9)       | 1515 (16.6)       | 5124 (30.6)       | 1782 (33.1)        | <0.001  |
|                      | <b>51-60 (%)</b>                       | 8017 (25.7)       | 1948 (21.3)       | 5170 (30.9)       | 899 (16.7)         |         |
|                      | <b>61-70 (%)</b>                       | 6650 (21.3)       | 2459 (26.9)       | 3206 (19.2)       | 985 (18.3)         |         |
|                      | <b>71-80 (%)</b>                       | 6006 (19.2)       | 2109 (23.1)       | 2568 (15.4)       | 1329 (24.7)        |         |
|                      | <b>81-90 (%)</b>                       | 1974 (6.3)        | 1008 (11.0)       | 604 (3.6)         | 362 (6.7)          |         |
|                      | <b>&gt;90 (%)</b>                      | 186 (0.6)         | 107 (1.2)         | 52 (0.3)          | 27 (0.5)           |         |
| <b>Gender</b>        | <b>female (%)</b>                      | 15248 (48.8)      | 4384 (47.9)       | 8184 (48.9)       | 2680 (49.8)        | 0.085   |
| <b>Smoking</b>       | <b>n (%)</b>                           | 5150 (16.5)       | 2285 (25.0)       | 1812 (10.8)       | 1053 (19.6)        | <0.001  |
| <b>IMD Rank</b>      | <b>Quintile 1 (least deprived) (%)</b> | 152 (0.5)         | 59 (0.6)          | 92 (0.6)          | 1 (0.0)            | <0.001  |
|                      | <b>Quintile 2 (%)</b>                  | 316 (1.0)         | 132 (1.4)         | 173 (1.0)         | 11 (0.2)           |         |
|                      | <b>Quintile 3 (%)</b>                  | 3348 (10.7)       | 1860 (20.3)       | 1255 (7.5)        | 233 (4.3)          |         |
|                      | <b>Quintile 4 (%)</b>                  | 5144 (16.5)       | 2243 (24.5)       | 2238 (13.4)       | 663 (12.3)         |         |
|                      | <b>Quintile 5 (most deprived) (%)</b>  | 22294 (71.3)      | 4852 (53.1)       | 12966 (77.5)      | 4476 (83.1)        |         |
| <b>AF</b>            | <b>n (%)</b>                           | 807 (2.6)         | 515 (5.6)         | 212 (1.3)         | 80 (1.5)           | <0.001  |
| <b>CKD</b>           | <b>n (%)</b>                           | 3648 (11.7)       | 1318 (14.4)       | 1691 (10.1)       | 639 (11.9)         | <0.001  |
| <b>Diabetes</b>      | <b>n (%)</b>                           | 9931 (31.8)       | 1771 (19.4)       | 6415 (38.4)       | 1745 (32.4)        | <0.001  |
| <b>Heart Failure</b> | <b>n (%)</b>                           | 822 (2.6)         | 308 (3.4)         | 385 (2.3)         | 129 (2.4)          | <0.001  |
| <b>Hypertension</b>  | <b>n (%)</b>                           | 16505 (52.8)      | 5181 (56.6)       | 8063 (48.2)       | 3261 (60.6)        | <0.001  |
| <b>IHD</b>           | <b>n (%)</b>                           | 4226 (13.5)       | 1417 (15.5)       | 2386 (14.3)       | 423 (7.9)          | <0.001  |
| <b>Stroke</b>        | <b>n (%)</b>                           | 1476 (4.7)        | 570 (6.2)         | 673 (4.0)         | 233 (4.4)          | <0.001  |
| <b>Comorbidities</b> | <b>median (lower, upper quartile)</b>  | 1.0 (0.0, 2.0)    | 1.0 (0.0, 2.0)    | 1.0 (0.0, 2.0)    | 1.0 (0.0, 2.0)     | 0.075   |
|                      | <b>0 (%)</b>                           | 9879 (31.6)       | 2829 (30.9)       | 5459 (32.6)       | 1591 (29.6)        | <0.001  |
|                      | <b>1 (%)</b>                           | 10707 (34.3)      | 3253 (35.6)       | 5524 (33)         | 1930 (35.8)        |         |
|                      | <b>2 (%)</b>                           | 6845 (21.9)       | 1898 (20.8)       | 3694 (22.1)       | 1253 (23.3)        |         |
|                      | <b>3 (%)</b>                           | 2667 (8.5)        | 785 (8.6)         | 1451 (8.7)        | 431 (8)            |         |
|                      | <b>4 (%)</b>                           | 828 (2.6)         | 254 (2.8)         | 447 (2.7)         | 127 (2.4)          |         |
|                      | <b>5 (%)</b>                           | 268 (0.9)         | 103 (1.1)         | 124 (0.7)         | 41 (0.8)           |         |
|                      | <b>6 (%)</b>                           | 55 (0.2)          | 23 (0.3)          | 23 (0.1)          | 9 (0.2)            |         |
|                      | <b>7 (%)</b>                           | 5 (<0.1)          | 1 (<0.1)          | 2 (<0.1)          | 2 (<0.1)           |         |
| <b>Creatinine</b>    | <b>mean (SD)</b>                       | 87.0 (25.8)       | 88.2 (24.7)       | 84.6 (25.4)       | 92.3 (28)          | <0.001  |
| <b>eGFR (ml/min)</b> | <b>median (lower, upper quartile)</b>  | 80.2 (66.7, 94.3) | 74.9 (62.3, 88.8) | 81.3 (68.1, 95.3) | 85.5 (72.3, 100.1) | <0.001  |
|                      | <b>&gt;120 (%)</b>                     | 1473 (4.7)        | 264 (2.9)         | 802 (4.8)         | 407 (7.6)          | <0.001  |
|                      | <b>90-120 (%)</b>                      | 8523 (27.3)       | 1842 (20.1)       | 4841 (28.9)       | 1840 (34.2)        |         |
|                      | <b>60-89 (%)</b>                       | 16373 (52.4)      | 5077 (55.5)       | 8776 (52.5)       | 2520 (46.8)        |         |
|                      | <b>45-59 (%)</b>                       | 3447 (11.0)       | 1389 (15.2)       | 1627 (9.7)        | 431 (8.0)          |         |
|                      | <b>30-44 (%)</b>                       | 1134 (3.6)        | 466 (5.1)         | 517 (3.1)         | 151 (2.8)          |         |
|                      | <b>15-29 (%)</b>                       | 304 (1.0)         | 108 (1.2)         | 161 (1.0)         | 35 (0.7)           |         |
| <b>Died</b>          | <b>n (%)</b>                           | 1435 (4.6)        | 681 (7.4)         | 541 (3.2)         | 213 (4.0)          | <0.001  |



Impact of CKD and comorbidity on mortality in a multi-ethnic population.

The number of vascular comorbidities was similar between groups, with 11-13% of each ethnic group having three or more comorbidities. The prevalence of different vascular comorbidities varied between groups: the white group had a lower reported prevalence of diabetes but a higher prevalence of CKD, atrial fibrillation, heart failure and stroke.

Median eGFR (corrected for ethnicity as appropriate) was 80.2 ml/min and was lowest in the white group (74.9 ml/min compared to 81.3 ml/min for South Asian individuals and 85.5 ml/min for those of black ethnicity;  $p < 0.001$ ). 21.5% of White, 13.8% of South Asian and 11.5% of Black individuals had an eGFR between 15 and 59 ml/min consistent with stage 3-4 CKD.

At the end of the study period a higher proportion of white individuals had died (7.4%) compared to the two other ethnic groups (South Asian 3.2%, Black 4.0%;  $p < 0.001$ ).

### Albumin Creatinine Ratio Cohort

An ACR had been tested in 7022 (42.0%), 2275 (24.9%) and 1908 (20.9%) of South Asian, black and white individuals respectively. **Table 2** lists the baseline characteristics for this subgroup. The median ACR was 1.1 mg/mmol and was highest in the South Asian group (1.2 mg/mmol compared to 1.0 mg/mmol for both white and black individuals;  $p < 0.001$ ). There were similar trends to the whole cohort for age distribution, eGFR, smoking status, and deprivation.

Those with an ACR tested were more likely to have a greater vascular comorbid burden (18-20% having three or more comorbidities). A higher proportion of individuals of South Asian descent, male gender and with diabetes had their ACR tested.

In concordance to the whole group analyses, deaths in the ACR cohort were highest amongst white individuals (7.8%) compared to the South Asian (3.6%) and black individuals (3.7%) ( $p < 0.001$ ).

### Univariate Analysis

The univariate (unadjusted) analysis for the complete cohort (**Table 3a**) demonstrated unadjusted HRs for death of 0.421 (95% CI 0.376 – 0.471,  $p < 0.001$ ) for people of South Asian ethnicity and 0.522 (95% CI 0.447 – 0.609,  $p < 0.001$ ) for people of black ethnicity compared to people of white ethnicity. The mortality rate increased exponentially with age and a higher HR was observed for male gender, current smokers and total number of comorbidities. No difference in mortality was found between deprivation quintiles. Using an eGFR of 90-119 ml/min as reference, a J-shaped relationship was observed with a higher risk of death seen for both higher and lower eGFR values. The HR for death increased progressively by stage of CKD with an eGFR  $< 90$  ml/min.

The univariate analysis was repeated for those individuals who had their ACR reported (**Table 3b**) with similar trends identified to the whole population analysis with the exception of no observed difference between individuals with an eGFR of  $\geq 120$  ml/min compared to 90-119 ml/min. A progressive increase in HR for death was seen with each increasing category for ACR.

Impact of CKD and comorbidity on mortality in a multi-ethnic population.

Table 2: Baseline characteristics by ethnicity. ACR tested cohort.

|                      |                                        | All               | White             | South Asian       | Black             | p-value |
|----------------------|----------------------------------------|-------------------|-------------------|-------------------|-------------------|---------|
| <b>Number</b>        | <b>n (%)</b>                           | 11205 (100)       | 1908 (17)         | 7022 (62.7)       | 2275 (20.3)       |         |
| <b>Age (years)</b>   | <b>median (lower, upper quartile)</b>  | 59.0 (50.0, 71.0) | 65.0 (55.0, 75.0) | 57.0 (50.0, 68.0) | 65.0 (49.0, 74.0) | <0.001  |
|                      | <b>50 and under (%)</b>                | 1900 (25.9)       | 304 (15.9)        | 1961 (27.9)       | 635 (27.9)        | <0.001  |
|                      | <b>51-60 (%)</b>                       | 3024 (27.0)       | 413 (21.6)        | 2239 (31.9)       | 372 (16.4)        |         |
|                      | <b>61-70 (%)</b>                       | 2370 (21.2)       | 496 (26.0)        | 1423 (20.3)       | 451 (19.8)        |         |
|                      | <b>71-80 (%)</b>                       | 2251 (20.1)       | 456 (23.9)        | 1152 (16.2)       | 643 (28.3)        |         |
|                      | <b>81-90 (%)</b>                       | 611 (5.5)         | 222 (11.6)        | 226 (3.2)         | 163 (7.2)         |         |
|                      | <b>&gt;90 (%)</b>                      | 49 (0.4)          | 17 (0.9)          | 21 (0.3)          | 11 (0.5)          |         |
| <b>Gender</b>        | <b>female (%)</b>                      | 4348 (38.8)       | 682 (35.7)        | 2754 (39.2)       | 912 (40.1)        | 0.008   |
| <b>Smoking</b>       | <b>n (%)</b>                           | 1869 (16.7)       | 518 (27.1)        | 872 (12.4)        | 479 (21.1)        | <0.001  |
| <b>IMD Rank</b>      | <b>Quintile 1 (least deprived) (%)</b> | 30 (0.3)          | 4 (0.2)           | 25 (0.4)          | 1 (0.0)           | <0.001  |
|                      | <b>Quintile 2 (%)</b>                  | 84 (0.7)          | 19 (1.0)          | 60 (0.9)          | 5 (0.2)           |         |
|                      | <b>Quintile 3 (%)</b>                  | 712 (6.4)         | 233 (12.2)        | 540 (5.7)         | 78 (3.4)          |         |
|                      | <b>Quintile 4 (%)</b>                  | 1458 (13.0)       | 339 (17.8)        | 876 (12.5)        | 243 (10.7)        |         |
|                      | <b>Quintile 5 (most deprived) (%)</b>  | 8921 (79.6)       | 1313 (68.8)       | 5660 (80.6)       | 1948 (85.6)       |         |
| <b>AF</b>            | <b>n (%)</b>                           | 233 (2.1)         | 113 (5.9)         | 91 (1.3)          | 29 (1.3)          | <0.001  |
| <b>CKD</b>           | <b>n (%)</b>                           | 1637 (14.6)       | 356 (18.7)        | 921 (13.1)        | 360 (15.8)        | <0.001  |
| <b>Diabetes</b>      | <b>n (%)</b>                           | 6828 (60.9)       | 990 (51.9)        | 4505 (62.4)       | 1333 (58.6)       | <0.001  |
| <b>Heart Failure</b> | <b>n (%)</b>                           | 310 (2.8)         | 74 (3.9)          | 175 (2.5)         | 61 (2.7)          | 0.005   |
| <b>Hypertension</b>  | <b>n (%)</b>                           | 6189 (55.2)       | 1092 (57.2)       | 3679 (52.4)       | 1418 (62.3)       | <0.001  |
| <b>IHD</b>           | <b>n (%)</b>                           | 1556 (13.9)       | 281 (14.7)        | 1071 (15.3)       | 201 (8.8)         | <0.001  |
| <b>Stroke</b>        | <b>n (%)</b>                           | 480 (4.3)         | 97 (5.1)          | 283 (4.0)         | 100 (4.4)         | 0.126   |
| <b>Comorbidities</b> | <b>median (lower, upper quartile)</b>  | 1.0 (1.0, 2.0)    | 2.0 (1.0, 2.0)    | 1.0 (1.0, 2.0)    | 2.0 (1.0, 2.0)    | 0.818   |
|                      | <b>0 (%)</b>                           | 2510 (22.4)       | 472 (24.7)        | 1514 (21.6)       | 524 (23.0)        | <0.001  |
|                      | <b>1 (%)</b>                           | 3139 (28.0)       | 466 (24.4)        | 2103 (29.9)       | 870 (25.1)        |         |
|                      | <b>2 (%)</b>                           | 3438 (30.7)       | 574 (30.1)        | 2093 (29.8)       | 771 (33.9)        |         |
|                      | <b>3 (%)</b>                           | 1481 (13.2)       | 261 (13.7)        | 928 (13.2)        | 292 (12.8)        |         |
|                      | <b>4 (%)</b>                           | 448 (4.0)         | 79 (4.1)          | 284 (4.0)         | 85 (3.7)          |         |
|                      | <b>5 (%)</b>                           | 154 (1.4)         | 46 (2.4)          | 83 (1.2)          | 25 (1.1)          |         |
|                      | <b>6 (%)</b>                           | 32 (0.3)          | 10 (0.5)          | 15 (0.2)          | 7 (0.3)           |         |
|                      | <b>7 (%)</b>                           | 3 (<0.1)          | 0 (<0.1)          | 2 (<0.1)          | 1 (<0.1)          |         |
| <b>Creatinine</b>    | <b>mean (SD)</b>                       | 89.1 (27.6)       | 91.8 (26.2)       | 86.2 (26.8)       | 95.8 (29.6)       | <0.001  |
| <b>eGFR (ml/min)</b> | <b>median (lower, upper quartile)</b>  | 81.1 (66.3, 95.9) | 74.3 (59.7, 89.8) | 82 (67.4, 89.8)   | 84.2 (70.0, 98.9) | <0.001  |
|                      | <b>&gt;120 (%)</b>                     | 611 (5.5)         | 67 (3.5)          | 380 (5.4)         | 164 (7.2)         | <0.001  |
|                      | <b>90-120 (%)</b>                      | 3234 (28.9)       | 404 (21.2)        | 2091 (29.8)       | 739 (32.5)        |         |
|                      | <b>60-89 (%)</b>                       | 5451 (48.6)       | 953 (49.9)        | 3453 (49.2)       | 1045 (45.9)       |         |
|                      | <b>45-59 (%)</b>                       | 1300 (11.6)       | 323 (16.9)        | 750 (10.7)        | 227 (10.0)        |         |
|                      | <b>30-44 (%)</b>                       | 487 (4.3)         | 131 (6.9)         | 274 (3.9)         | 82 (3.6)          |         |
|                      | <b>15-29 (%)</b>                       | 122 (1.1)         | 30 (1.6)          | 74 (1.1)          | 18 (0.8)          |         |
| <b>ACR (mg/mmol)</b> | <b>median (lower, upper quartile)</b>  | 1.1 (0.4, 3.4)    | 1.0 (1.4, 2.8)    | 1.2 (0.5, 3.8)    | 1.0 (0.3, 2.9)    | <0.001  |
|                      | <b>Optimal (&lt;1.1) (%)</b>           | 5641 (50.3)       | 1026 (53.8)       | 3400 (48.4)       | 1214 (53.4)       | <0.001  |
|                      | <b>High Normal (1.1-2.99) (%)</b>      | 2485 (22.2)       | 426 (22.3)        | 1560 (22.2)       | 499 (21.9)        |         |
|                      | <b>High (3.0-29.99) (%)</b>            | 2594 (23.2)       | 402 (21.1)        | 1717 (24.4)       | 475 (20.9)        |         |
|                      | <b>Very High (30 - 200) (%)</b>        | 413 (3.7)         | 49 (2.6)          | 287 (4.1)         | 77 (3.4)          |         |
|                      | <b>Nephrotic (&gt;200) (%)</b>         | 73 (0.7)          | 5 (0.3)           | 58 (0.8)          | 10 (0.4)          |         |
| <b>Died</b>          | <b>n (%)</b>                           | 484 (4.3)         | 149 (7.8)         | 250 (3.6)         | 85 (3.7)          | <0.001  |

Impact of CKD and comorbidity on mortality in a multi-ethnic population.

Table 3: Cox Proportional Hazard Regression Analysis. Univariate (unadjusted) analyses

|               |                             | Complete Cohort (3a)      |          | ACR Tested Cohort (3b)    |         |
|---------------|-----------------------------|---------------------------|----------|---------------------------|---------|
|               |                             | Hazard Ratio              | P value  | Hazard Ratio              | P value |
|               |                             | (95% Confidence Interval) |          | (95% Confidence Interval) |         |
| Ethnicity     | White                       | Reference population      | <0.001*  | Reference Population      | <0.001* |
|               | South Asian                 | 0.421 (0.376 - 0.471)     | <0.001   | 0.444 (0.362 - 0.545)     | <0.001  |
|               | Black                       | 0.522 (0.447 - 0.609)     | <0.001   | 0.467 (0.357 - 0.611)     | <0.001  |
| Age (years)   | 50 and under                | Reference population      | <0.001*  | Reference Population      | <0.001* |
|               | 51-60                       | 2.127 (1.553 - 2.914)     | <0.001   | 1.757 (1.057 - 2.921)     | 0.03    |
|               | 61-70                       | 5.429 (4.078 - 7.228)     | <0.001   | 4.646 (2.926 - 7.345)     | <0.001  |
|               | 71-80                       | 12.971 (9.887 - 17.016)   | <0.001   | 11.363 (7.376 - 17.505)   | <0.001  |
|               | 81-90                       | 32.86 (29.952 - 43.275)   | <0.001   | 24.725 (15.769 - 38.767)  | <0.001  |
|               | >90                         | 90.904 (65.097 - 126.943) | <0.001   | 82.731 (46.684 - 146.612) | <0.001  |
| Gender        | Female as reference         | 1.375 (1.238 - 1.529)     | <0.001   | 1.401 (1.155 - 1.699)     | 0.001   |
| Smoker        | Non-smoker as reference     | 1.154 (1.009 - 1.317)     | 0.036    | 1.259 (1.006 - 1.574)     | 0.044   |
| IMD Rank      | Quintile 1 (least deprived) | 0.860 (0.385 - 1.919)     | 0.713    | <0.001 (<0.001 - >10^5)   | 0.939   |
|               | Quintile 2                  | 0.822 (0.465 - 1.453)     | 0.501    | <0.001 (<0.001 - >10^5)   | 0.897   |
|               | Quintile 3                  | 1.002 (0.846 - 1.186)     | 0.983    | 1.151 (0.818 - 1.619)     | 0.419   |
|               | Quintile 4                  | 0.925 (0.800 - 1.070)     | 0.297    | 0.774 (0.577 - 1.039)     | 0.088   |
|               | Quintile 5 (most deprived)  | Reference population      | (0.802*) | Reference Population      | (0.42*) |
| AF            |                             | 5.588 (4.757 - 6.565)     | <0.001   | 6.123 (4.568 - 8.207)     | <0.001  |
| CKD           |                             | 3.442 (3.074 - 3.854)     | <0.001   | 3.498 (2.904 - 4.213)     | <0.001  |
| Diabetes      |                             | 1.346 (1.209 - 1.498)     | <0.001   | 1.939 (1.577 - 2.385)     | <0.001  |
| Heart Failure |                             | 7.622 (6.595 - 8.804)     | <0.001   | 7.279 (5.681 - 9.327)     | <0.001  |
| Hypertension  |                             | 2.079 (1.857 - 2.325)     | <0.001   | 2.05 (1.681 - 2.499)      | <0.001  |
| IHD           |                             | 2.796 (2.495 - 3.132)     | <0.001   | 3.136 (2.592 - 3.795)     | <0.001  |
| Stroke        |                             | 3.654 (3.154 - 4.233)     | <0.001   | 3.709 (2.855 - 4.817)     | <0.001  |
| Comorbidities | 0                           | Reference population      | <0.001*  | Reference population      | <0.001* |
|               | 1                           | 1.775 (1.487 - 2.118)     | <0.001   | 1.630 (1.094 - 2.430)     | 0.016   |
|               | 2                           | 2.930 (2.458 - 3.493)     | <0.001   | 2.917 (2.023 - 4.205)     | <0.001  |
|               | 3                           | 5.486 (4.550 - 6.615)     | <0.001   | 5.580 (3.837 - 8.113)     | <0.001  |
|               | 4                           | 9.584 (7.691 - 11.942)    | <0.001   | 9.855 (6.511 - 14.917)    | <0.001  |
|               | 5                           | 17.591 (13.490 - 22.939)  | <0.001   | 21.091 (13.479 - 33.001)  | <0.001  |
|               | 6                           | 28.391 (18.411 - 43.782)  | <0.001   | 33.673 (17.519 - 64.722)  | <0.001  |
|               | 7                           | 11.873 (1.664 - 84.728)   | 0.014    | 29.402 (4.031 - 214.462)  | 0.001   |
| eGFR (ml/min) | >120                        | 1.492 (1.110 - 2.007)     | 0.008    | 1.072 (0.603 - 1.903)     | 0.813   |
|               | 90-120                      | Reference population      | <0.001*  | Reference Population      | <0.001* |
|               | 60-89                       | 1.360 (1.162 - 1.591)     | <0.001   | 1.504 (1.138 - 1.987)     | 0.04    |
|               | 45-59                       | 3.849 (3.239 - 4.573)     | <0.001   | 4.255 (3.155 - 5.737)     | <0.001  |
|               | 30-44                       | 6.590 (5.401 - 8.041)     | <0.001   | 7.715 (5.564 - 10.699)    | <0.001  |
|               | 15-29                       | 14.465 (11.341 - 18.450)  | <0.001   | 15.054 (9.942 - 22.796)   | <0.001  |
| ACR (mg/mmol) | Optimal (<1.1)              |                           |          | Reference Population      | <0.001* |
|               | High Normal (1.1-2.99)      |                           |          | 1.363 (1.038 - 1.788)     | 0.026   |
|               | High (3.0-29.99)            |                           |          | 2.967 (2.381 - 3.697)     | <0.001  |
|               | Very High (30 - 200)        |                           |          | 6.253 (4.493 - 14.005)    | <0.001  |
|               | Nephrotic (>200)            |                           |          | 7.932 (4.493 - 14.005)    | <0.001  |

\* P-value for overall effect

Impact of CKD and comorbidity on mortality in a multi-ethnic population.

### Multivariate Analysis

Following adjustment for covariates the differences in ethnicity remained; people of South Asian and black ethnicities had a lower HR for death in all analyses.

Model 1 (complete cohort, incorporating the number of identified comorbidities, see **Supplementary Table I**) analysed the complete cohort and showed an adjusted HR for death of 0.673 (95% CI 0.595 – 0.761,  $p<0.001$ ) for people of South Asian ethnicity and 0.592 (95% CI 0.504 – 0.696,  $p<0.001$ ) for people of black ethnicity compared to people of white ethnicity. When the analysis was restricted to the cohort with ACR tests available the HR for death was 0.757 (95% CI 0.61 – 0.939,  $p=0.011$ ) for people of South Asian ethnicity and 0.526 for people of black ethnicity (95% CI 0.4 – 0.692,  $p<0.001$ ) compared to people of white ethnicity. For the complete cohort, mortality risk was lower in IMD quintiles 3 and 4 (compared to the most deprived quintile 5). No significant difference between IMD quintiles was identified in the ACR cohort. Increasing age (51 and over in complete cohort, 61 and over in ACR cohort), smoking status and male gender was significant in analyses for both cohorts. An increased HR for death was observed for two or more comorbidities, with the HR increasing as the number of comorbidities increased.

Kidney function (eGFR) was incorporated into Model 2 (with the removal of CKD from the comorbidity score, see **Supplementary Table I**) and in the complete cohort the HR for people of South-Asian ethnicity was 0.678 (95% CI 0.6 – 0.767  $p<0.001$ ) and for people of black ethnicity was 0.789 (95% CI 0.635 – 0.98,  $p=0.032$ ) compared to people of white ethnicity. Similarly, when the analysis was restricted to the cohort of patients with ACR tests available people of South Asian and Black ethnicity had a lower proportion of deaths compared to people of white ethnicity with HRs of 0.614 (95% CI 0.522 – 0.722,  $p<0.001$ ) and 0.575 (95% CI 0.435 – 0.759,  $p<0.001$ ) respectively. In the complete cohort mortality risk was lower in the IMD quintile 4. More than two comorbidities were associated with an increasing HR and an increased HR of death compared to the reference eGFR range (90-119 ml/min) was seen with an eGFR  $\geq 120$  ml/min and  $\geq 45$  ml/min. An eGFR of 60-89 ml/min was associated with a lower HR. In the analysis of those with ACR tested, an eGFR  $<60$  ml/min was associated with progressively higher HR by CKD stage.

In model 3 (all vascular comorbidities except CKD and the addition of eGFR and ACR, **Table 4**) the HR for death for people of South Asian ethnicity was 0.697 (95% CI 0.56 – 0.868,  $p=0.001$ ) and for people of black ethnicity was 0.533 (95% CI 0.403 – 0.704,  $p<0.001$ ) compared to people of white ethnicity (**Figure 2**). Older age, male gender, being a current smoker and increasing comorbidity (two or more) were associated with an increased HR of death (**Figure 3**). An ACR of 'high' or greater (i.e.  $\geq 3.0$  mg/mmol) and an eGFR  $<45$  ml/min was also associated with an increased HR for death. No significant differences in HRs were observed between deprivation quintiles.

Impact of CKD and comorbidity on mortality in a multi-ethnic population.

Table 4: Cox Proportional Hazard Regression Analysis. Multivariate (adjusted) analyses. Model 3.

|               |                             | ACR Tested Cohort                         |         |
|---------------|-----------------------------|-------------------------------------------|---------|
|               |                             | Hazard Ratio<br>(95% Confidence Interval) | P value |
| Ethnicity     | White                       | Reference Population                      | <0.001* |
|               | South Asian                 | 0.697 (0.56 - 0.868)                      | 0.001   |
|               | Black                       | 0.533 (0.403 - 0.704)                     | <0.001  |
| Age (years)   | 50 and under                | Reference Population                      | <0.001* |
|               | 51-60                       | 1.519 (0.907 - 2.546)                     | 0.112   |
|               | 61-70                       | 3.521 (2.17 - 5.712)                      | <0.001  |
|               | 71-80                       | 7.381 (4.61 - 11.818)                     | <0.001  |
|               | 81-90                       | 15.721 (9.534 - 25.922)                   | <0.001  |
|               | >90                         | 51.641 (27.889 - 95.621)                  | <0.001  |
| Gender        | Female as reference         | 1.782 (1.46 - 2.176)                      | <0.001  |
| Smoker        | Non-smoker as reference     | 1.886 (1.488 - 2.392)                     | <0.001  |
| IMD Rank      | Quintile 1 (least deprived) | <0.001 (<0.001 - >10 <sup>5</sup> )       | 0.952   |
|               | Quintile 2                  | <0.001 (<0.001 - >10 <sup>5</sup> )       | 0.913   |
|               | Quintile 3                  | 0.978 (0.68 - 1.387)                      | 0.902   |
|               | Quintile 4                  | 0.788 (0.585 - 1.062)                     | 0.118   |
|               | Quintile 5 (most deprived)  | Reference Population                      | 0.65*   |
| Comorbidities | 0                           | Reference population                      | <0.001* |
|               | 1                           | 1.371 (0.932 - 2.016)                     | 0.109   |
|               | 2                           | 1.486 (1.019 - 2.166)                     | 0.039   |
|               | 3                           | 2.29 (1.53 - 3.428)                       | <0.001  |
|               | 4                           | 3.153 (2.002 - 4.964)                     | <0.001  |
|               | 5                           | 5.141 (2.869 - 9.212)                     | <0.001  |
|               | 6                           | 10.54 (2.52 - 44.084)                     | 0.001   |
| eGFR (ml/min) | >120                        | 1.396 (0.782 - 2.492)                     | 0.26    |
|               | 90-120                      | Reference Population                      | <0.001* |
|               | 60-89                       | 0.907 (0.982 - 1.207)                     | 0.505   |
|               | 45-59                       | 1.282 (0.932 - 1.763)                     | 0.126   |
|               | 30-44                       | 1.566 (1.095 - 2.239)                     | 0.014   |
|               | 15-29                       | 2.073 (1.315 - 3.268)                     | 0.002   |
| ACR (mg/mmol) | Optimal (<1.1)              | Reference Population                      | <0.001* |
|               | High Normal (1.1-2.99)      | 1.032 (0.784 - 1.359)                     | 0.821   |
|               | High (3.0-29.99)            | 1.837 (1.464 - 2.305)                     | <0.001  |
|               | Very High (30 - 200)        | 2.956 (2.132 - 4.099)                     | <0.001  |
|               | Nephrotic (>200)            | 3.838 (2.108 - 6.985)                     | <0.001  |

\* P-value for overall effect

Impact of CKD and comorbidity on mortality in a multi-ethnic population.

Figure 2. Cox Regression Survival Plot. Differences between ethnicities in Model 3 (comorbidities, eGFR and ACR)

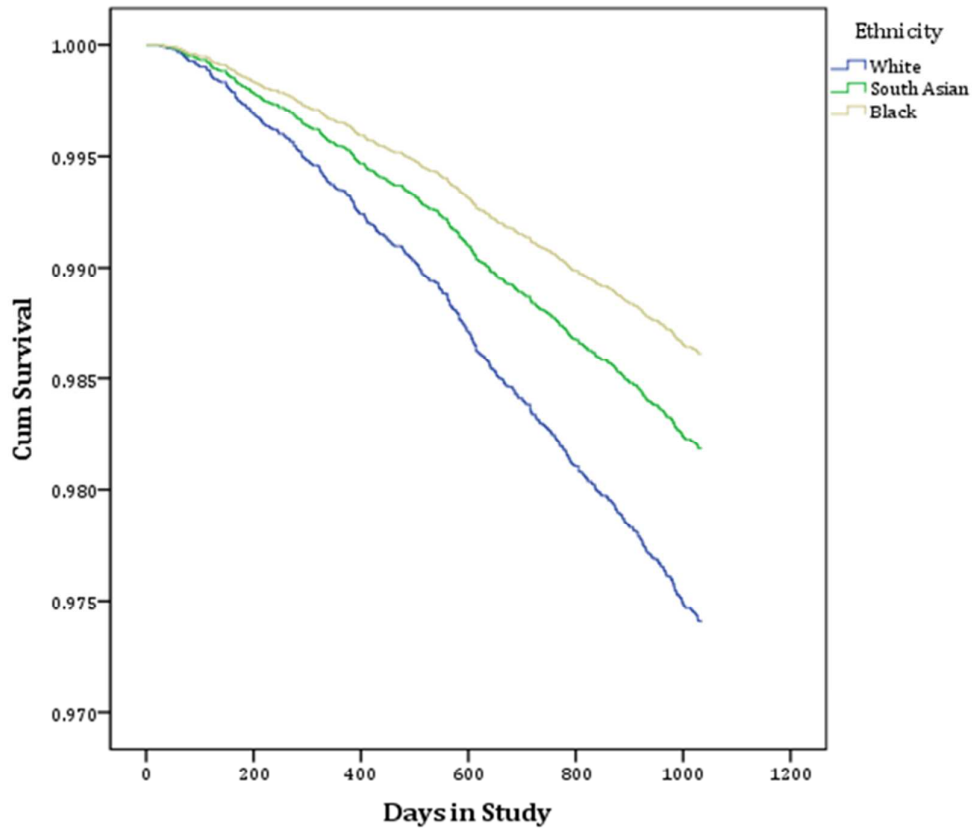

1  
2  
3  
4  
5  
6  
7  
8  
9  
10  
11  
12  
13  
14  
15  
16  
17  
18  
19  
20  
21  
22  
23  
24  
25  
26  
27  
28  
29  
30  
31  
32  
33  
34  
35  
36  
37  
38  
39  
40  
41  
42  
43  
44  
45  
46  
47  
48  
49  
50  
51  
52  
53  
54  
55  
56  
57  
58  
59  
60

Impact of CKD and comorbidity on mortality in a multi-ethnic population.

Figure 3. Hazard ratio (HR) for death by number of comorbidities. Multivariate (adjusted) analysis: Model 3

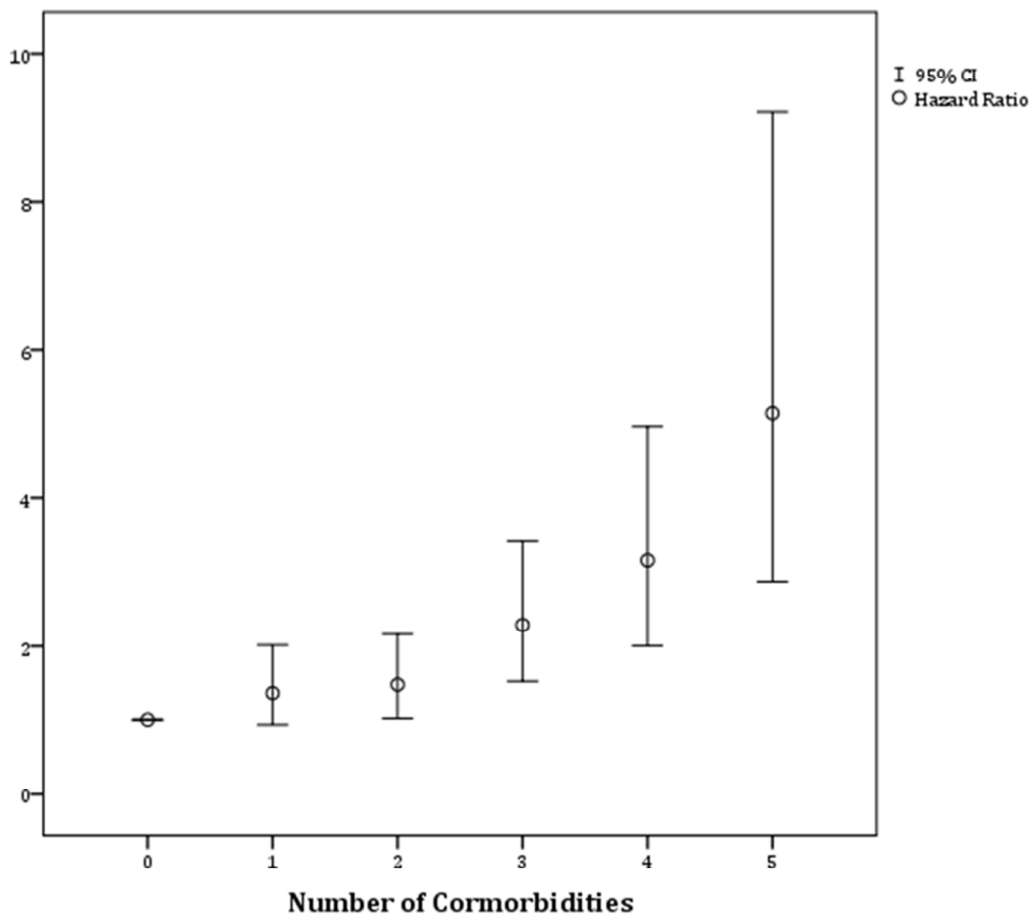

HR not illustrated for 6 comorbidities; HR 10.54 (95% CI 2.52 - 44.084)

Peer Review Only

1  
2  
3  
4  
5  
6  
7  
8  
9  
10  
11  
12  
13  
14  
15  
16  
17  
18  
19  
20  
21  
22  
23  
24  
25  
26  
27  
28  
29  
30  
31  
32  
33  
34  
35  
36  
37  
38  
39  
40  
41  
42  
43  
44  
45  
46  
47  
48  
49  
50  
51  
52  
53  
54  
55  
56  
57  
58  
59  
60

Impact of CKD and comorbidity on mortality in a multi-ethnic population.

## Discussion

This study utilised routinely available clinical and laboratory data, including kidney function assessed by eGFR and ACR, from a large primary care population. We included in the analysis detailed socio-economic status (SES) and, importantly, studied three ethnic groups, South-Asian, black and white. Prior to this research, there has been uncertainty about the impact of ethnicity and SES on clinical outcomes in people with significant comorbidities including CKD. The comprehensive nature of the dataset coupled with the ability to utilise the Primary Care Mortality Database has allowed us to assess the relative impact of these factors on survival.

We found that previous associations between lower eGFR and higher ACR and increased mortality applied to this population. Furthermore, these associations remained significant when adjusted for ethnicity, age, gender, cardiovascular risk factors and SES. These results add weight to the risk stratification benefit of measuring ACR has in high risk groups.

A strong cumulative impact of comorbidity on CKD and ethnicity was shown. Whereas traditional comorbidity scores such as the Charlson Comorbidity Index <sup>31</sup> are difficult to calculate accurately in a large primary care setting, our study demonstrates that a simple cumulative score can be used to risk stratify. A similar approach, but also including non-cardiovascular risk factors has recently been described <sup>32</sup>. Our study demonstrates that routinely collected clinical data can be utilised to quantify risk. Potential implications for this include identifying (and targeting) those at the highest risk.

SES was measured by the IMD 2007 score; a cumulative deprivation index score incorporating seven areas of deprivation which has been validated as superior to other deprivation scores <sup>28</sup>. One notable finding is that we did not demonstrate any association between mortality when corrected for all other factors including comorbidity and ethnicity. This is not consistent with a number of other studies, which have shown that there is an independent relationship between SES and mortality and this applies across disease states and ethnic groups <sup>33-36</sup>. Whilst we studied a health care system that is free at the point of care, limiting possible health access issues, the majority of individuals were from the most deprived national quintile. We therefore re-ran the analyses dividing the cohort into equal quintiles. All analyses continue to indicate the effect of ethnicity and the importance of cardiovascular comorbidity and renal function. The univariate analysis (**Supplementary Table II**) and the most comprehensive multivariate analysis (Model 3, **Supplementary Table III**) did not show any differences between most and least deprived quintiles.

One of the seven areas included in the IMD is health deprivation, raising the possibility of an inbuilt relationship between and deprivation and health even before analyses are undertaken. The possible implication of this was investigated by Adams and White <sup>37</sup> who analysed data having removed the health domain from IMD 2004 and found that its removal had little, practical, effect. This suggests the presence of the health domain is unlikely to influence our result.



Impact of CKD and comorbidity on mortality in a multi-ethnic population.

1  
2  
3 We found that the risk of death was lower for people of South Asian and black ethnicity compared to  
4 people of white ethnicity, and this remained in all analyses (adjusted and unadjusted) performed.  
5 Previous studies comparing the outcomes of different ethnic groups have been limited in their  
6 generalizability. They have either looked at disease specific mortality<sup>8 18 20 21</sup> or have been based in  
7 populations that do not have access to free comprehensive healthcare. The finding that differences in  
8 mortality risk between ethnic groups is independent of age, gender, SES, kidney function and  
9 comorbidities requires further work. There may be other external factors which can explain this risk or  
10 factors related to genetic diversity which may require genome wide studies to elucidate.

11  
12  
13  
14  
15 A major strength in this study is the sample size, which included sixty-two practices of varying list size  
16 and number of practitioners. Ethnicity was documented in over 80% of the population studied; this is,  
17 much higher than normally found in primary care records<sup>38</sup>. Renal function was described in terms of  
18 eGFR and ACR, the latter becoming of increased prominence in the stratification of cardiovascular risk.  
19

20  
21  
22 Our analyses have used data from primary care coding and recording systems, which formed part of the  
23 electronic downloads. There is a relative paucity of published literature regarding the correct  
24 identification of people onto the correct risk registers<sup>39 40</sup>. Surrogate measures of accuracy of the data  
25 include previous studies looking at gaming for QOF points (falsely classifying people with conditions they  
26 do not have thereby increasing revenue) or exception reporting (excluding individuals who have not had  
27 the appropriate monitoring completed) suggest that both these are rare<sup>23 41 42</sup>.

28  
29  
30  
31 Not all individuals had their ACR measured and the percentage varied between ethnic groups, one of the  
32 limitations of retrospective, population-based analyses. A higher number of males and individuals with  
33 diabetes or of South Asian descent had an ACR performed. However, similar trends for mortality were  
34 observed for age distribution, eGFR, smoking status and deprivation, suggesting generalizability of  
35 results.  
36  
37

38  
39 In summary, we have shown the determinants of mortality were multifactorial in a high risk population  
40 and that ethnicity should be considered as a non-traditional risk factor for mortality; the HR for death  
41 was lower for South Asian and black individuals compared to white individuals which was, in part,  
42 independent of age, gender, SES, renal function and comorbidities. Furthermore, a simple cumulative  
43 comorbidity system may have prognostic utility. Renal function (eGFR and ACR) provides additional  
44 information and gender, age and smoking status remain significant risk factors for mortality.  
45  
46  
47  
48  
49  
50  
51  
52  
53  
54  
55  
56  
57  
58  
59  
60

Impact of CKD and comorbidity on mortality in a multi-ethnic population.

### Acknowledgements

none

### Competing Interests

Mark Jesky has received funding from JABBS foundation

AC Felix Burden has advised and received honoraria from Enhanced Healthcare Services Ltd

### Funding

This research received no specific grant from any funding agency in the public, commercial or not-for-profit sectors

### Contributorship

Mark Jesky: study design, data analysis, preparation of manuscript

Amanda Lambert: study design, data acquisition and analysis, review of manuscript

AC Felix Burden: study design, data acquisition, review of manuscript

Paul Cockwell: study design, data analysis, preparation and review of manuscript

### Data sharing

No other data will be available.

Impact of CKD and comorbidity on mortality in a multi-ethnic population.

## References

1. Go AS, Chertow GM, Fan D, et al. Chronic kidney disease and the risks of death, cardiovascular events, and hospitalization. *N Engl J Med* 2004;351(13):1296-305.
2. Matsushita K, van der Velde M, Astor BC, et al. Association of estimated glomerular filtration rate and albuminuria with all-cause and cardiovascular mortality in general population cohorts: a collaborative meta-analysis. *Lancet* 2010;375(9731):2073-81.
3. Astor BC, Matsushita K, Gansevoort RT, et al. Lower estimated glomerular filtration rate and higher albuminuria are associated with mortality and end-stage renal disease. A collaborative meta-analysis of kidney disease population cohorts. *Kidney Int* 2011;79(12):1331-40.
4. Gansevoort RT, Matsushita K, van der Velde M, et al. Lower estimated GFR and higher albuminuria are associated with adverse kidney outcomes. A collaborative meta-analysis of general and high-risk population cohorts. *Kidney Int* 2011;80(1):93-104.
5. Zhang QL, Rothenbacher D. Prevalence of chronic kidney disease in population-based studies: systematic review. *BMC Public Health* 2008;8:117.
6. Coresh J, Selvin E, Stevens LA, et al. Prevalence of chronic kidney disease in the United States. *JAMA* 2007;298(17):2038-47.
7. Peralta CA, Katz R, Deboer I, et al. Racial and Ethnic Differences in Kidney Function Decline among Persons without Chronic Kidney Disease. *J Am Soc Nephrol* 2011;22(7):1327-34.
8. Barbour SJ, Er L, Djurdjev O, et al. Differences in progression of CKD and mortality amongst Caucasian, Oriental Asian and South Asian CKD patients. *Nephrol Dial Transplant* 2010;25(11):3663-72.
9. Choi AI, Rodriguez RA, Bacchetti P, et al. White/black racial differences in risk of end-stage renal disease and death. *Am J Med* 2009;122(7):672-8.
10. Crews DC, Sozio SM, Liu Y, et al. Inflammation and the paradox of racial differences in dialysis survival. *J Am Soc Nephrol* 2011;22(12):2279-86.
11. Hallan SI, Matsushita K, Sang Y, et al. Age and association of kidney measures with mortality and end-stage renal disease. *JAMA* 2012;308(22):2349-60.
12. Herzog CA, Asinger RW, Berger AK, et al. Cardiovascular disease in chronic kidney disease. A clinical update from Kidney Disease: Improving Global Outcomes (KDIGO). *Kidney Int* 2011;80(6):572-86.
13. Mahmoodi BK, Matsushita K, Woodward M, et al. Associations of kidney disease measures with mortality and end-stage renal disease in individuals with and without hypertension: a meta-analysis. *Lancet* 2012;380(9854):1649-61.
14. Benjamin EJ, Wolf PA, D'Agostino RB, et al. Impact of atrial fibrillation on the risk of death: the Framingham Heart Study. *Circulation* 1998;98(10):946-52.
15. Ford ES. Trends in mortality from all causes and cardiovascular disease among hypertensive and nonhypertensive adults in the United States. *Circulation* 2011;123(16):1737-44.
16. Afkarian M, Sachs MC, Kestenbaum B, et al. Kidney disease and increased mortality risk in type 2 diabetes. *J Am Soc Nephrol* 2013;24(2):302-8.
17. Bahrami H, Kronmal R, Bluemke DA, et al. Differences in the incidence of congestive heart failure by ethnicity: the multi-ethnic study of atherosclerosis. *Arch Intern Med* 2008;168(19):2138-45.
18. Balarajan R. Ethnic differences in mortality from ischaemic heart disease and cerebrovascular disease in England and Wales. *BMJ* 1991;302(6776):560-4.
19. Cappuccio FP. Ethnicity and cardiovascular risk: variations in people of African ancestry and South Asian origin. *J Hum Hypertens* 1997;11(9):571-6.
20. Khan NA, Wang H, Anand S, et al. Ethnicity and sex affect diabetes incidence and outcomes. *Diabetes Care* 2011;34(1):96-101.
21. Chaturvedi N, Jarrett J, Morrish N, et al. Differences in mortality and morbidity in African Caribbean and European people with non-insulin dependent diabetes mellitus: results of 20 year follow up of a London cohort of a multinational study. *BMJ* 1996;313(7061):848-52.
22. Shekelle P. New contract for general practitioners. *BMJ* 2003;326(7387):457-8.
23. Calvert M, Shankar A, McManus RJ, et al. Effect of the quality and outcomes framework on diabetes care in the United Kingdom: retrospective cohort study. *BMJ* 2009;338:b1870.
24. PEEG, Current Estimates, Population Estimates by Ethnic Group Mid-2002-2008 for Primary Care Organisations (experimental): Office of national Statistics, 2008. [<http://www.ons.gov.uk/ons/taxonomy/index.html?nscl=Population+Estimates+by+Ethnic+Group>]
25. Quality and Outcomes Framework. [[www.hscic.gov.uk/qof](http://www.hscic.gov.uk/qof)]

Impact of CKD and comorbidity on mortality in a multi-ethnic population.

- 1
- 2
- 3 26. Index of Multiple Deprivation (IMD) 2007: Office for National Statistics, 2007.
- 4 [http://data.gov.uk/dataset/index\_of\_multiple\_deprivation\_imd\_2007]
- 5 27. Townsend P, Phillimore P, Beattie A. *Health and deprivation: inequality and the north*. London: Croom
- 6 Helm, 1988.
- 7 28. Jordan H, Roderick P, Martin D. The Index of Multiple Deprivation 2000 and accessibility effects on
- 8 health. *J Epidemiol Community Health* 2004;58(3):250-7.
- 9 29. Primary Care Mortality Database. [http://www.hscic.gov.uk/pcmdatabase]
- 10 30. Levey AS, de Jong PE, Coresh J, et al. The definition, classification, and prognosis of chronic kidney
- 11 disease: a KDIGO Controversies Conference report. *Kidney Int* 2011;80(1):17-28.
- 12 31. Charlson ME, Pompei P, Ales KL, et al. A new method of classifying prognostic comorbidity in
- 13 longitudinal studies: development and validation. *J Chronic Dis* 1987;40(5):373-83.
- 14 32. Carey IM, Shah SM, Harris T, et al. A new simple primary care morbidity score predicted mortality and
- 15 better explains between practice variations than the Charlson index. *J Clin Epidemiol*
- 16 2013;66(4):436-44.
- 17 33. Johnson-Lawrence V, Kaplan G, Galea S. Socioeconomic mobility in adulthood and cardiovascular
- 18 disease mortality. *Ann Epidemiol* 2013;23(4):167-71.
- 19 34. Lazzarino AI, Hamer M, Stamatakis E, et al. The combined association of psychological distress and
- 20 socioeconomic status with all-cause mortality: a national cohort study. *JAMA Intern Med*
- 21 2013;173(1):22-7.
- 22 35. Jackson CA, Jones NR, Walker JJ, et al. Area-based socioeconomic status, type 2 diabetes and
- 23 cardiovascular mortality in Scotland. *Diabetologia* 2012;55(11):2938-45.
- 24 36. Gallo V, Mackenbach JP, Ezzati M, et al. Social inequalities and mortality in Europe--results from a
- 25 large multi-national cohort. *PLoS One* 2012;7(7):e39013.
- 26 37. Adams J, White M. Removing the health domain from the Index of Multiple Deprivation 2004-effect on
- 27 measured inequalities in census measure of health. *J Public Health (Oxf)* 2006;28(4):379-83.
- 28 38. Raleigh VS. Collection of data on ethnic origin in England. *BMJ* 2008;337:a1107.
- 29 39. Humphreys J, Harvey G, Coleiro M, et al. A collaborative project to improve identification and
- 30 management of patients with chronic kidney disease in a primary care setting in Greater
- 31 Manchester. *BMJ Qual Saf* 2012;21(8):700-8.
- 32 40. Martin D, Wright JA. Disease prevalence in the English population: a comparison of primary care
- 33 registers and prevalence models. *Soc Sci Med* 2009;68(2):266-74.
- 34 41. Doran T, Fullwood C, Reeves D, et al. Exclusion of patients from pay-for-performance targets by
- 35 English physicians. *N Engl J Med* 2008;359(3):274-84.
- 36 42. Campbell S, Hannon K, Lester H. Exception reporting in the Quality and Outcomes Framework: views
- 37 of practice staff - a qualitative study. *Br J Gen Pract* 2011;61(585):183-9.
- 38
- 39
- 40
- 41
- 42
- 43
- 44
- 45
- 46
- 47
- 48
- 49
- 50
- 51
- 52
- 53
- 54
- 55
- 56
- 57
- 58
- 59
- 60

Impact of CKD and comorbidity on mortality in a multi-ethnic population.  
 Jesky et al.  
 Supplementary Tables

**Supplementary Table I:** Cox Proportional Hazard Regression Analysis. National IMD quintiles. Multivariate (adjusted) analyses

|               |                             | Model 1                   |          |                                     |          | Model 2                   |          |                                     |          |
|---------------|-----------------------------|---------------------------|----------|-------------------------------------|----------|---------------------------|----------|-------------------------------------|----------|
|               |                             | Complete Cohort           |          | ACR Tested Cohort                   |          | Complete Cohort           |          | ACR Tested Cohort                   |          |
|               |                             | Hazard Ratio              | P value  | Hazard Ratio                        | P value  | Hazard Ratio              | P value  | Hazard Ratio                        | P value  |
|               |                             | (95% Confidence Interval) |          | (95% Confidence Interval)           |          | (95% Confidence Interval) |          | (95% Confidence Interval)           |          |
| Ethnicity     | White                       | Reference population      | <0.001*  | Reference Population                | <0.001*  | Reference population      | <0.001*  | Reference population                | <0.001*  |
|               | South Asian                 | 0.673 (0.595 - 0.761)     | <0.001   | 0.757 (0.61 - 0.939)                | 0.011    | 0.678 (0.6 - 0.767)       | <0.001   | 0.789 (0.635 - 0.98)                | 0.032    |
|               | Black                       | 0.592 (0.504 - 0.696)     | <0.001   | 0.526 (0.4 - 0.692)                 | <0.001   | 0.614 (0.522 - 0.722)     | <0.001   | 0.575 (0.435 - 0.759)               | <0.001   |
| Age (years)   | 50 and under                | Reference population      | <0.001*  | Reference Population                | <0.001*  | Reference population      | <0.001*  | Reference population                | <0.001*  |
|               | 51-60                       | 1.958 (1.425 - 2.691)     | <0.001   | 1.538 (0.919 - 2.573)               | 0.101    | 2.09 (1.52 - 2.874)       | <0.001   | 1.571 (0.937 - 2.632)               | 0.086    |
|               | 61-70                       | 4.512 (3.358 - 6.062)     | <0.001   | 3.634 (2.252 - 5.867)               | <0.001   | 4.918 (3.651 - 6.625)     | <0.001   | 3.697 (2.278 - 6.002)               | <0.001   |
|               | 71-80                       | 10.075 (7.568 - 13.412)   | <0.001   | 8.124 (5.122 - 12.887)              | <0.001   | 10.904 (8.153 - 14.582)   | <0.001   | 7.95 (4.962 - 12.738)               | <0.001   |
|               | 81-90                       | 23.973 (17.839 - 32.217)  | <0.001   | 17.018 (10.444 - 27.73)             | <0.001   | 25.203 (18.626 - 34.104)  | <0.001   | 16.155 (9.79 - 26.659)              | <0.001   |
|               | >90                         | 68.62 (48.166 - 97.759)   | <0.001   | 61.221 (33.372 - 112.31)            | <0.001   | 68.189 (47.554 - 97.777)  | <0.001   | 52.695 (28.401 - 97.77)             | <0.001   |
| Gender        | Female as reference         | 1.451 (1.303 - 1.616)     | <0.001   | 1.806 (1.48 - 2.203)                | <0.001   | 1.447 (1.298 - 1.612)     | <0.001   | 1.819 (1.491 - 2.22)                | <0.001   |
| Smoker        | Non-smoker as reference     | 1.722 (1.495 - 1.983)     | <0.001   | 1.986 (1.567 - 2.517)               | <0.001   | 1.692 (1.469 - 1.95)      | <0.001   | 1.959 (1.546 - 2.483)               | <0.001   |
| IMD Rank      | Quintile 1 (least deprived) | 1.081 (0.484 - 2.416)     | 0.849    | <0.001 (<0.001 - >10 <sup>5</sup> ) | 0.951    | 1.115 (0.499 - 2.494)     | 0.79     | <0.001 (<0.001 - >10 <sup>5</sup> ) | 0.951    |
|               | Quintile 2                  | 0.906 (0.512 - 1.603)     | 0.734    | <0.001 (<0.001 - >10 <sup>5</sup> ) | 0.916    | 0.896 (0.506 - 1.587)     | 0.707    | <0.001 (<0.001 - >10 <sup>5</sup> ) | 0.917    |
|               | Quintile 3                  | 0.821 (0.689 - 0.979)     | 0.028    | 0.979 (0.692 - 1.387)               | 0.907    | 0.841 (0.705 - 1.003)     | 0.054    | 0.984 (0.694 - 1.395)               | 0.929    |
|               | Quintile 4                  | 0.733 (0.63 - 0.852)      | <0.001   | 0.753 (0.559 - 1.015)               | 0.062    | 0.737 (0.634 - 0.857)     | <0.001   | 0.776 (0.576 - 1.046)               | 0.096    |
|               | Quintile 5 (most deprived)  | Reference population      | (0.001*) | Reference Population                | (0.478*) | Reference population      | (0.002*) | Reference population                | (0.592*) |
| Comorbidities | 0                           | Reference population      | <0.001*  | Reference population                | <0.001*  | Reference population      | <0.001*  | Reference population                | <0.001*  |
|               | 1                           | 1.045 (0.87 - 1.254)      | 0.64     | 1.394 (0.926 - 2.098)               | 0.112    | 1.024 (0.863 - 1.215)     | 0.788    | 1.459 (0.993 - 2.145)               | 0.055    |
|               | 2                           | 1.262 (1.049 - 1.52)      | 0.014    | 1.831 (1.242 - 2.701)               | 0.002    | 1.208 (1.099 - 1.445)     | 0.039    | 1.698 (1.166 - 2.471)               | 0.006    |
|               | 3                           | 1.824 (1.495 - 2.226)     | <0.001   | 2.551 (1.706 - 3.814)               | <0.001   | 2.118 (1.739 - 2.58)      | <0.001   | 2.719 (1.823 - 4.055)               | <0.001   |
|               | 4                           | 2.722 (2.157 - 3.435)     | <0.001   | 3.866 (2.479 - 6.031)               | <0.001   | 2.643 (2.055 - 3.399)     | <0.001   | 3.713 (2.362 - 5.838)               | <0.001   |
|               | 5                           | 3.892 (2.949 - 5.136)     | <0.001   | 6.247 (3.880 - 10.057)              | <0.001   | 3.641 (2.518 - 5.265)     | <0.001   | 6.203 (3.461 - 11.118)              | <0.001   |
|               | 6                           | 6.535 (4.202 - 10.162)    | <0.001   | 10.83 (5.527 - 21.219)              | <0.001   | 5.069 (1.615 - 15.909)    | 0.005    | 10.017 (2.395 - 41.898)             | 0.002    |
|               | 7                           | 3.085 (0.431 - 22.084)    | 0.262    | 8.972 (1.217 - 66.15)               | 0.031    |                           |          |                                     |          |
| eGFR (ml/min) | >120                        |                           |          |                                     |          | 2.02 (1.5 - 2.721)        | <0.001   | 1.466 (0.822 - 2.616)               | 0.195    |
|               | 90-120                      |                           |          |                                     |          | Reference population      | <0.001*  | Reference population                | <0.001*  |
|               | 60-89                       |                           |          |                                     |          | 0.82 (0.699 - 0.962)      | 0.015    | 0.936 (0.704 - 1.245)               | 0.649    |
|               | 45-59                       |                           |          |                                     |          | 1.102 (0.917 - 1.324)     | 0.301    | 1.395 (1.014 - 1.918)               | 0.041    |
|               | 30-44                       |                           |          |                                     |          | 1.342 (1.084 - 1.662)     | 0.007    | 1.947 (1.367 - 2.775)               | <0.001   |
|               | 15-29                       |                           |          |                                     |          | 2.929 (2.267 - 3.784)     | <0.001   | 3.256 (2.095 - 5.059)               | <0.001   |

\* P-value for overall effect

Impact of CKD and comorbidity on mortality in a multi-ethnic population.

Jesky et al.

Supplementary Tables

**Supplementary Table II:** Cox Proportional Hazard Regression Analysis. Population specific IMD quintiles. Univariate (unadjusted) analyses

|              |                             | Complete Cohort (2a)      |         | ACR Tested Cohort (2b)    |          |
|--------------|-----------------------------|---------------------------|---------|---------------------------|----------|
|              |                             | Hazard Ratio              | P value | Hazard Ratio              | P value  |
|              |                             | (95% Confidence Interval) |         | (95% Confidence Interval) |          |
| HoB IMD Rank | Quintile 1 (least deprived) | 0.942 (0.798 - 1.111)     | 0.476   | 0.831 (0.6 - 1.152)       | 0.268    |
|              | Quintile 2                  | 0.947 (0.806 - 1.113)     | 0.507   | 0.943 (0.725 - 1.227)     | 0.664    |
|              | Quintile 3                  | 0.895 (0.761 - 1.054)     | 0.183   | 0.71 (0.537 - 0.938)      | 0.016    |
|              | Quintile 4                  | 0.923 (0.786 - 1.084)     | 0.33    | 0.908 (0.701 - 1.179)     | 0.465    |
|              | Quintile 5 (most deprived)  | Reference Population      | (0.75*) | Reference Population      | (0.154*) |

\* P-value for overall effect

For peer review only

Impact of CKD and comorbidity on mortality in a multi-ethnic population.  
 Jesky et al.  
 Supplementary Tables

**Supplementary Table III:** Cox Proportional Hazard Regression Analysis. Population specific IMD quintiles. Multivariate (adjusted) analyses

|                      |                                    | Model 1                                   |          |                                           |          | Model 2                                   |          |                                           |          | Model 3                                   |          |
|----------------------|------------------------------------|-------------------------------------------|----------|-------------------------------------------|----------|-------------------------------------------|----------|-------------------------------------------|----------|-------------------------------------------|----------|
|                      |                                    | Complete Cohort                           |          | ACR Tested Cohort                         |          | Complete Cohort                           |          | ACR Tested Cohort                         |          | ACR Tested Cohort                         |          |
|                      |                                    | Hazard Ratio<br>(95% Confidence Interval) | P value  |
| <b>Ethnicity</b>     | <b>White</b>                       | Reference population                      | <0.001*  | Reference population                      | <0.001*  | Reference population                      | <0.001*  | Reference population                      | (0.001*) | Reference population                      | <0.001*  |
|                      | <b>South Asian</b>                 | 0.674 (0.596 - 0.762)                     | <0.001   | 0.753 (0.606 - 0.934)                     | 0.01     | 0.68 (0.601 - 0.769)                      | <0.001   | 0.788 (0.634 - 0.979)                     | 0.031    | 0.7 (0.562 - 0.871)                       | 0.001    |
|                      | <b>Black</b>                       | 0.598 (0.510 - 0.701)                     | <0.001   | 0.529 (0.403 - 0.694)                     | <0.001   | 0.621 (0.528 - 0.729)                     | <0.001   | 0.579 (0.44 - 0.763)                      | <0.001   | 0.538 (0.408 - 0.71)                      | <0.001   |
| <b>Age (years)</b>   | <b>50 and under</b>                | Reference population                      | <0.001*  |
|                      | <b>51-60</b>                       | 1.957 (1.424 - 2.689)                     | <0.001   | 1.536 (0.918 - 2.569)                     | 0.102    | 2.09 (1.519 - 2.874)                      | <0.001   | 1.569 (0.936 - 2.628)                     | 0.087    | 1.516 (0.905 - 2.541)                     | 0.114    |
|                      | <b>61-70</b>                       | 4.526 (3.369 - 6.082)                     | <0.001   | 3.659 (2.268 - 5.906)                     | <0.001   | 4.945 (3.671 - 6.661)                     | <0.001   | 3.728 (2.297 - 6.051)                     | <0.001   | 3.543 (2.184 - 5.747)                     | <0.001   |
|                      | <b>71-80</b>                       | 10.113 (7.596 - 13.463)                   | <0.001   | 8.166 (5.147 - 12.955)                    | <0.001   | 10.951 (8.189 - 14.646)                   | <0.001   | 7.987 (4.984 - 12.8)                      | <0.001   | 7.42 (4.633 - 11.883)                     | <0.001   |
|                      | <b>81-90</b>                       | 24.007 (17.865 - 32.260)                  | <0.001   | 16.998 (10.429 - 27.704)                  | <0.001   | 25.291 (18.692 - 34.221)                  | <0.001   | 16.211 (9.819 - 26.762)                   | <0.001   | 15.724 (9.531 - 25.943)                   | <0.001   |
|                      | <b>&gt;90</b>                      | 68.995 (48.423 - 98.305)                  | <0.001   | 62.046 (33.832 - 113.786)                 | <0.001   | 68.684 (47.891 - 98.504)                  | <0.001   | 53.526 (28.861 - 99.272)                  | <0.001   | 52.376 (28.275 - 97.022)                  | <0.001   |
| <b>Gender</b>        | <b>Female as reference</b>         | 1.45 (1.302 - 1.615)                      | <0.001   | 1.809 (1.483 - 2.206)                     | <0.001   | 1.446 (1.298 - 1.611)                     | <0.001   | 1.82 (1.492 - 2.221)                      | <0.001   | 1.785 (1.462 - 2.179)                     | <0.001   |
| <b>Smoker</b>        | <b>Non-smoker as reference</b>     | 1.715 (1.488 - 1.975)                     | 0.001    | 1.987 (1.567 - 2.519)                     | <0.001   | 1.687 (1.464 - 1.945)                     | <0.001   | 1.961 (1.546 - 2.487)                     | <0.001   | 1.889 (1.488 - 2.397)                     | <0.001   |
| <b>HoB IMD Rank</b>  | <b>Quintile 1 (least deprived)</b> | 0.687 (0.578 - 0.817)                     | <0.001   | 0.705 (0.505 - 0.984)                     | 0.04     | 0.698 (0.587 - 0.829)                     | <0.001   | 0.741 (0.53 - 1.036)                      | 0.079    | 0.768 (0.549 - 1.074)                     | 0.123    |
|                      | <b>Quintile 2</b>                  | 0.854 (0.725 - 1.005)                     | 0.057    | 0.891 (0.683 - 1.162)                     | 0.394    | 0.847 (0.719 - 0.996)                     | 0.045    | 0.893 (0.684 - 1.164)                     | 0.402    | 0.935 (0.716 - 1.22)                      | 0.619    |
|                      | <b>Quintile 3</b>                  | 0.917 (0.779 - 1.079)                     | 0.295    | 0.735 (0.555 - 0.974)                     | 0.032    | 0.815 (0.778 - 1.078)                     | 0.289    | 0.754 (0.57 - 0.999)                      | 0.049    | 0.793 (0.598 - 1.051)                     | 0.107    |
|                      | <b>Quintile 4</b>                  | 0.845 (0.719 - 0.992)                     | 0.04     | 0.797 (0.615 - 1.034)                     | 0.087    | 0.829 (0.706 - 0.974)                     | 0.023    | 0.804 (0.62 - 1.043)                      | 0.1      | 0.837 (0.645 - 1.086)                     | 0.18     |
|                      | <b>Quintile 5 (most deprived)</b>  | Reference population                      | (0.001*) | Reference population                      | (0.127*) | Reference population                      | (0.001*) | Reference population                      | (0.22*)  | Reference population                      | (0.362*) |
| <b>Comorbidities</b> | <b>0</b>                           | Reference population                      | <0.001*  |
|                      | <b>1</b>                           | 1.042 (0.868 - 1.251)                     | 0.66     | 1.397 (0.928 - 2.103)                     | 0.109    | 1.019 (0.859 - 1.21)                      | 0.828    | 1.461 (0.994 - 2.148)                     | 0.053    | 1.374 (0.935 - 2.021)                     | 0.106    |
|                      | <b>2</b>                           | 1.256 (1.043 - 1.512)                     | 0.016    | 1.829 (1.241 - 2.696)                     | 0.002    | 1.201 (1.004 - 1.437)                     | 0.045    | 1.69 (1.161 - 2.46)                       | 0.006    | 1.48 (1.016 - 2.157)                      | 0.041    |
|                      | <b>3</b>                           | 1.822 (1.493 - 2.224)                     | <0.001   | 2.544 (1.701 - 3.803)                     | <0.001   | 2.12 (1.74 - 2.582)                       | <0.001   | 2.708 (1.816 - 4.039)                     | <0.001   | 2.276 (1.521 - 3.408)                     | <0.001   |
|                      | <b>4</b>                           | 2.741 (2.172 - 3.459)                     | <0.001   | 3.911 (2.507 - 6.101)                     | <0.001   | 2.653 (2.063 - 3.411)                     | <0.001   | 3.779 (2.403 - 5.944)                     | <0.001   | 3.207 (2.037 - 5.051)                     | <0.001   |
|                      | <b>5</b>                           | 3.927 (2.976 - 5.18)                      | <0.001   | 6.363 (3.952 - 10.244)                    | <0.001   | 3.691 (2.553 - 5.336)                     | <0.001   | 6.488 (3.614 - 11.648)                    | <0.001   | 5.317 (2.962 - 9.548)                     | <0.001   |
|                      | <b>6</b>                           | 6.666 (4.287 - 10.366)                    | <0.001   | 11.583 (5.902 - 22.73)                    | <0.001   | 5.079 (1.618 - 15.946)                    | 0.005    | 9.982 (2.386 - 41.769)                    | 0.002    | 10.519 (2.513 - 44.026)                   | 0.001    |
|                      | <b>7</b>                           | 2.993 (0.418 - 21.429)                    | 0.275    | 8.507 (1.152 - 62.821)                    | 0.036    |                                           |          |                                           |          |                                           |          |
| <b>eGFR (ml/min)</b> | <b>&gt;120</b>                     |                                           |          |                                           |          | 2.00 (1.485 - 2.693)                      | <0.001   | 1.458 (0.817 - 2.601)                     | 0.202    | 1.385 (0.775 - 2.473)                     | 0.271    |
|                      | <b>90-120</b>                      |                                           |          |                                           |          | Reference population                      | <0.001*  | Reference population                      | <0.001*  | Reference population                      | <0.001*  |
|                      | <b>60-89</b>                       |                                           |          |                                           |          | 0.815 (0.694 - 0.957)                     | 0.012    | 0.934 (0.702 - 1.243)                     | 0.641    | 0.906 (0.681 - 1.206)                     | 0.498    |
|                      | <b>45-59</b>                       |                                           |          |                                           |          | 1.096 (0.912 - 1.316)                     | 0.33     | 1.397 (1.016 - 1.922)                     | 0.04     | 1.288 (0.936 - 1.772)                     | 0.12     |
|                      | <b>30-44</b>                       |                                           |          |                                           |          | 1.34 (1.082 - 1.659)                      | 0.007    | 1.925 (1.35 - 2.744)                      | <0.001   | 1.544 (1.079 - 2.21)                      | 0.018    |
|                      | <b>15-29</b>                       |                                           |          |                                           |          | 2.927 (2.266 - 3.781)                     | <0.001   | 3.281 (2.112 - 5.098)                     | <0.001   | 2.103 (1.335 - 3.314)                     | 0.001    |
| <b>ACR (mg/mmol)</b> | <b>Optimal (&lt;1.1)</b>           |                                           |          |                                           |          |                                           |          |                                           |          | Reference population                      | <0.001*  |
|                      | <b>High Normal (1.1-2.99)</b>      |                                           |          |                                           |          |                                           |          |                                           |          | 1.041 (0.791 - 1.37)                      | 0.773    |
|                      | <b>High (3.0-29.99)</b>            |                                           |          |                                           |          |                                           |          |                                           |          | 1.84 (1.466 - 2.309)                      | <0.001   |
|                      | <b>Very High (30 - 200)</b>        |                                           |          |                                           |          |                                           |          |                                           |          | 2.982 (2.15 - 4.136)                      | <0.001   |
|                      | <b>Nephrotic (&gt;200)</b>         |                                           |          |                                           |          |                                           |          |                                           |          | 3.584 (1.967 - 6.528)                     | <0.001   |

\* P-value for overall effect

STROBE 2007 (v4) Statement—Checklist of items that should be included in reports of cohort studies

| Section/Topic             | Item # | Recommendation                                                                                                                                                                       | Reported on page # |
|---------------------------|--------|--------------------------------------------------------------------------------------------------------------------------------------------------------------------------------------|--------------------|
| Title and abstract        | 1      | (a) Indicate the study’s design with a commonly used term in the title or the abstract                                                                                               | 2                  |
|                           |        | (b) Provide in the abstract an informative and balanced summary of what was done and what was found                                                                                  | 2                  |
| <b>Introduction</b>       |        |                                                                                                                                                                                      |                    |
| Background/rationale      | 2      | Explain the scientific background and rationale for the investigation being reported                                                                                                 | 3                  |
| Objectives                | 3      | State specific objectives, including any prespecified hypotheses                                                                                                                     | 3                  |
| <b>Methods</b>            |        |                                                                                                                                                                                      |                    |
| Study design              | 4      | Present key elements of study design early in the paper                                                                                                                              | 3-6                |
| Setting                   | 5      | Describe the setting, locations, and relevant dates, including periods of recruitment, exposure, follow-up, and data collection                                                      | 5,6                |
| Participants              | 6      | (a) Give the eligibility criteria, and the sources and methods of selection of participants. Describe methods of follow-up                                                           | 4 (Figure 1)       |
|                           |        | (b) For matched studies, give matching criteria and number of exposed and unexposed                                                                                                  | n/a                |
| Variables                 | 7      | Clearly define all outcomes, exposures, predictors, potential confounders, and effect modifiers. Give diagnostic criteria, if applicable                                             | 5,6                |
| Data sources/ measurement | 8*     | For each variable of interest, give sources of data and details of methods of assessment (measurement). Describe comparability of assessment methods if there is more than one group | 3-5                |
| Bias                      | 9      | Describe any efforts to address potential sources of bias                                                                                                                            | 15                 |
| Study size                | 10     | Explain how the study size was arrived at                                                                                                                                            | 4 (Figure 1)       |
| Quantitative variables    | 11     | Explain how quantitative variables were handled in the analyses. If applicable, describe which groupings were chosen and why                                                         | 5,6                |
| Statistical methods       | 12     | (a) Describe all statistical methods, including those used to control for confounding                                                                                                | 5,6                |
|                           |        | (b) Describe any methods used to examine subgroups and interactions                                                                                                                  | 6                  |
|                           |        | (c) Explain how missing data were addressed                                                                                                                                          | 6                  |
|                           |        | (d) If applicable, explain how loss to follow-up was addressed                                                                                                                       | n/a                |
|                           |        | (e) Describe any sensitivity analyses                                                                                                                                                | n/a                |
| <b>Results</b>            |        |                                                                                                                                                                                      |                    |



|                          |     |                                                                                                                                                                                                              |                          |
|--------------------------|-----|--------------------------------------------------------------------------------------------------------------------------------------------------------------------------------------------------------------|--------------------------|
| Participants             | 13* | (a) Report numbers of individuals at each stage of study—eg numbers potentially eligible, examined for eligibility, confirmed eligible, included in the study, completing follow-up, and analysed            | 4 (Figure 1)             |
|                          |     | (b) Give reasons for non-participation at each stage                                                                                                                                                         | 4 (Figure 1)             |
|                          |     | (c) Consider use of a flow diagram                                                                                                                                                                           | 4 (Figure 1)             |
| Descriptive data         | 14* | (a) Give characteristics of study participants (eg demographic, clinical, social) and information on exposures and potential confounders                                                                     | 7 (Table 1), 9 (Table 2) |
|                          |     | (b) Indicate number of participants with missing data for each variable of interest                                                                                                                          | 8                        |
|                          |     | (c) Summarise follow-up time (eg, average and total amount)                                                                                                                                                  | 5                        |
| Outcome data             | 15* | Report numbers of outcome events or summary measures over time                                                                                                                                               | 7 (Table 1), 9 (Table 2) |
| Main results             | 16  | (a) Give unadjusted estimates and, if applicable, confounder-adjusted estimates and their precision (eg, 95% confidence interval). Make clear which confounders were adjusted for and why they were included | 9-10                     |
|                          |     | (b) Report category boundaries when continuous variables were categorized                                                                                                                                    | 9-10                     |
|                          |     | (c) If relevant, consider translating estimates of relative risk into absolute risk for a meaningful time period                                                                                             | n/a                      |
| Other analyses           | 17  | Report other analyses done—eg analyses of subgroups and interactions, and sensitivity analyses                                                                                                               | 11-12                    |
| <b>Discussion</b>        |     |                                                                                                                                                                                                              |                          |
| Key results              | 18  | Summarise key results with reference to study objectives                                                                                                                                                     | 15-16                    |
| <b>Limitations</b>       |     |                                                                                                                                                                                                              |                          |
| Interpretation           | 20  | Give a cautious overall interpretation of results considering objectives, limitations, multiplicity of analyses, results from similar studies, and other relevant evidence                                   | 16                       |
| Generalisability         | 21  | Discuss the generalisability (external validity) of the study results                                                                                                                                        | 16                       |
| <b>Other information</b> |     |                                                                                                                                                                                                              |                          |
| Funding                  | 22  | Give the source of funding and the role of the funders for the present study and, if applicable, for the original study on which the present article is based                                                | 17                       |

\*Give information separately for cases and controls in case-control studies and, if applicable, for exposed and unexposed groups in cohort and cross-sectional studies.

**Note:** An Explanation and Elaboration article discusses each checklist item and gives methodological background and published examples of transparent reporting. The STROBE checklist is best used in conjunction with this article (freely available on the Web sites of PLoS Medicine at <http://www.plosmedicine.org/>, Annals of Internal Medicine at <http://www.annals.org/>, and Epidemiology at <http://www.epidem.com/>). Information on the STROBE Initiative is available at [www.strobe-statement.org](http://www.strobe-statement.org).

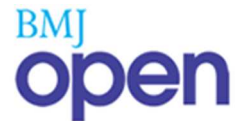

**The impact of chronic kidney disease and cardiovascular comorbidity on mortality in a multi-ethnic population: a retrospective cohort study**

|                                 |                                                                                                                                                                                                                                                                                                                                                                                                                  |
|---------------------------------|------------------------------------------------------------------------------------------------------------------------------------------------------------------------------------------------------------------------------------------------------------------------------------------------------------------------------------------------------------------------------------------------------------------|
| Journal:                        | <i>BMJ Open</i>                                                                                                                                                                                                                                                                                                                                                                                                  |
| Manuscript ID:                  | bmjopen-2013-003458.R1                                                                                                                                                                                                                                                                                                                                                                                           |
| Article Type:                   | Research                                                                                                                                                                                                                                                                                                                                                                                                         |
| Date Submitted by the Author:   | 04-Sep-2013                                                                                                                                                                                                                                                                                                                                                                                                      |
| Complete List of Authors:       | Jesky, Mark; Queen Elizabeth Hospital Birmingham, Department of Renal Medicine; University of Birmingham, Division of Infection and Immunity Lambert, Amanda; Birmingham City Council, Public Health Intelligence Burden, AC Felix; NHS Birmingham and Solihull, Cockwell, Paul; Queen Elizabeth Hospital Birmingham, Department of Renal Medicine; University of Birmingham, Division of Infection and Immunity |
| <b>Primary Subject Heading</b>: | Epidemiology                                                                                                                                                                                                                                                                                                                                                                                                     |
| Secondary Subject Heading:      | Renal medicine, Cardiovascular medicine, General practice / Family practice                                                                                                                                                                                                                                                                                                                                      |
| Keywords:                       | Chronic renal failure < NEPHROLOGY, EPIDEMIOLOGY, PRIMARY CARE                                                                                                                                                                                                                                                                                                                                                   |
|                                 |                                                                                                                                                                                                                                                                                                                                                                                                                  |

SCHOLARONE™  
Manuscripts

Impact of CKD and comorbidity on mortality in a multi-ethnic population.

1  
2  
3 **The impact of chronic kidney disease and cardiovascular comorbidity on mortality in a multi-**  
4 **ethnic population: a retrospective cohort study**  
5  
6  
7

8 **Mark Jesky<sup>1,2</sup>, Amanda Lambert<sup>3</sup>, AC Felix Burden<sup>4</sup>, Paul Cockwell<sup>1,2</sup>**  
9

- 10  
11 **1. Department of Renal Medicine, Queen Elizabeth Hospital Birmingham, UK**  
12 **2. Division of Infection and Immunity, University of Birmingham, UK**  
13 **3. Public Health Intelligence, Birmingham City Council, UK**  
14 **4. Sandwell and West Birmingham Clinical Commissioning Group, UK**  
15  
16  
17  
18  
19

20 **Corresponding Author**  
21

22 Dr. Mark Jesky  
23 Department of Renal Medicine,  
24 Queen Elizabeth Hospital Birmingham,  
25 Mindelsohn Way,  
26 Edgbaston,  
27 Birmingham,  
28 B15 2WB  
29 UK

30 Tel: 00 44 121 371 5852  
31 Fax: 00 44 121 371 5858  
32 Email: mark.jesky@uhb.nhs.uk  
33

34  
35 **Key Words**  
36

37 Chronic Kidney Disease, Comorbidity, Epidemiology, Ethnicity  
38

39 **Word Count (excluding title page, abstract, references, figures and tables)**  
40

41 3,690 words  
42  
43  
44  
45  
46  
47  
48  
49  
50  
51  
52  
53  
54  
55  
56  
57  
58  
59  
60

Impact of CKD and comorbidity on mortality in a multi-ethnic population.

## Abstract

**Objective:** To assess the impact of chronic kidney disease (CKD) and cardiovascular comorbidity on mortality in a multi-ethnic primary care population.

**Design:** Retrospective, cohort study.

**Setting:** Inner-city primary care trust in West Midlands, United Kingdom.

**Participants:** Individuals aged 40 years and older, of South Asian, black or white ethnicity, registered with a general practice and with their kidney function checked within the last 12 months (n=31,254).

**Outcome Measure:** All-cause mortality.

**Results:** Reduced estimated Glomerular Filtration Rate, higher albuminuria, older age, white ethnicity (versus South-Asian or black ethnicity) and increasing cardiovascular comorbidities were independent determinants of a higher mortality risk. In the multivariate model including comorbidities and kidney function, the hazard ratio for mortality for South Asians was 0.697 (95% confidence interval (CI) 0.56 – 0.868, p=0.001) and for blacks was 0.533 (95% CI 0.403 – 0.704, p<0.001) compared to whites.

**Conclusions:** The hazard ratio for death is lower for South Asian and black individuals compared to white individuals. This is, in part, independent of age, gender, socio-economic status, kidney function and comorbidities. Risk of death is higher in individuals with CKD and with a higher cumulative cardiovascular comorbidity.

## Article summary

- Article focus
  - Retrospective, primary care based cohort study
  - Investigating relationship between ethnicity and cardiovascular comorbidity
  - Inner city population with high deprivation
- Key messages
  - Renal function (both eGFR and ACR) conveys prognostic significance
  - Risk of death increases with a higher cumulative comorbidity score
  - Hazard ratio for death is lower for South Asian and black individuals compared to white individuals
- Strengths and limitations of this study
  - Sample size with inclusion of many practices
  - Ethnicity data self-reported and well recorded (>80%)
  - Individuals of white ethnicity relatively underrepresented

Impact of CKD and comorbidity on mortality in a multi-ethnic population.

## Introduction

Chronic kidney disease (CKD) is a risk factor for increased mortality,[1] with an increased risk of death associated with both declining excretory renal function and albuminuria.[2-4] CKD prevalence and the risk imparted by CKD may vary by ethnicity; for example, some studies indicate that CKD is more common in people of white ethnicity [5 ,6] but non-white ethnic groups have a faster progression to end-stage kidney disease.[7 ,8] Paradoxically, when treated with chronic dialysis treatment, people of non-white ethnicity have a lower mortality risk than people of white ethnicity.[9 ,10] An increased risk of death is also associated with other comorbidities, including hypertension, diabetes and cardiovascular disease (CVD). [11-16]

Whilst previous studies have indicated survival differences between ethnic groups,[8 ,17-21] there has been limited reporting in these studies on the relative impact of comorbidities including kidney function on a population basis. This paucity of data reflects a shortfall in the availability of population based primary care databases linked to estimated Glomerular Filtration Rate (eGFR) and albuminuria reporting and traceable to mortality. Furthermore there is minimal comparative data on people of South Asian ethnicity; comparative studies usually report data on Chinese-Asians.[5]

In the United Kingdom, there has been a systematic improvement in chronic disease recognition through a primary care pay for performance system, the Quality and Outcomes Framework (QOF). [22 ,23] This system utilises chronic disease registers for the identification, monitoring and management of patients with known comorbidities; a component of this monitoring involves measuring and documenting renal function. These disease registers can be combined with laboratory results and linked with demographic and mortality data to better identify determinants of outcomes.

We have therefore utilised chronic disease registers to perform a retrospective cohort study of the relationship between CKD, cardiovascular (CV) comorbidity and mortality within a deprived, inner-city multi-ethnic population. Our study hypotheses were

1. There are differences in mortality between different ethnic groups.
2. These differences in mortality are explained by known risk factors including comorbidities, renal function, demographic and socioeconomic factors.

This study incorporated all stages of kidney function except stage 5 CKD (an eGFR below 15ml/min/1.73m<sup>2</sup>) in patients with known CV comorbidities and focused on three ethnic groups: South Asian (including individuals of Bangladeshi, Indian and Pakistani descent), black (individuals from or who have ancestors from Africa or the Caribbean) and white.

## Methods

**Ethics:** The data was fully anonymised and was available as a component of an on-going clinical development programme. The responsible NHS R&D Consortium stated that this study did not require

Impact of CKD and comorbidity on mortality in a multi-ethnic population.

1  
2  
3 ethical submission to an NHS research ethics committee as it represented an evaluation of part of an on-  
4 going primary care trust (PCT) programme. For PCT data extraction the PCT professional executive  
5 committee and GP locality leads provided approval for the programme, including evaluation and  
6 publication.  
7  
8

9  
10 **Cohort identification:** The cohort was derived from Heart of Birmingham (Teaching) Primary Care Trust  
11 (HoB PCT) which had a registered population of 312,070 (September 2008). The majority of the  
12 population (62%) were non-white.[24] Sixty nine percent of the population were below 40 years of age.  
13 Data were collected centrally, utilising software able to identify comorbidities through their classification  
14 on chronic disease registers [Enhanced Healthcare Services, Essex, UK]. Complete sets of anonymised  
15 data were available for 63 out of 73 general practices within HoB PCT comprising a population of 285,221  
16 and these were extracted from electronic downloads. **Figure 1** illustrates the selection process for  
17 inclusion in the study.  
18  
19  
20  
21  
22  
23  
24  
25  
26  
27  
28  
29  
30  
31  
32  
33  
34  
35  
36  
37  
38  
39  
40  
41  
42  
43  
44  
45  
46  
47  
48  
49  
50  
51  
52  
53  
54  
55  
56  
57  
58  
59  
60

Impact of CKD and comorbidity on mortality in a multi-ethnic population.

1  
2  
3 The inclusion criteria comprised individuals aged 40 years and over whom had kidney function testing  
4 performed within the previous 12 months as recommended by national guidelines.[25] Data for the  
5 following variables were collected: age, gender, ethnicity, current smoking status, socio-economic status  
6 (SES), eGFR and/or creatinine, urinary albumin:creatinine ratio (ACR) and vascular comorbidity (atrial  
7 fibrillation, chronic kidney disease, diabetes mellitus, heart failure, hypertension, ischaemic heart disease  
8 and stroke) as defined by a relevant clinical (Read) code specified by the UK pay for performance (QOF)  
9 business rules.[26] Ethnicity was self-reported, considered the 'gold standard' for classification.[27]

10  
11  
12  
13 A standardised Isotope Dilution Mass Spectrometry (IDMS) MDRD eGFR [28] was reported from one of  
14 three local biochemistry laboratories, however eGFR reporting was not universally recorded on primary  
15 care systems in 2008 and if this was not available the eGFR was calculated by utilising laboratory  
16 provided correction factors for the creatinine to generate IDMS traceable MDRD eGFR. One general  
17 practice in the catchment area was excluded as IDMS traceable creatinine was not available from a fourth  
18 laboratory that provided blood tests specifically for that catchment area.

19  
20  
21  
22  
23 Socio-economic status (SES) was assessed using the Index of Multiple Deprivation (IMD 2007); [29] this  
24 utilises the postcode from an individual's address to identify the Lower Layer Super Output Area (LSOA)  
25 where the individual resides. Each of the 32,482 LSOAs in England are assigned a score and rank for the  
26 IMD 2007, with lower ranks corresponding to the most deprived areas. The Index of Multiple Deprivation  
27 has been validated as superior to traditional deprivation indexes such as the Townsend score,[30] due to  
28 its use of multiple domains reflective of socioeconomic deprivation.[31] The IMD 2007 score  
29 incorporates seven areas of deprivation: income deprivation; employment deprivation; health  
30 deprivation and disability; education; skills and training deprivation; barriers to housing and services;  
31 living environment deprivation; and crime. For the analyses presented, deprivation was divided into  
32 national quintiles, with the most deprived quintile as the reference population (i.e. how mortality in less  
33 deprived quintiles compared to the most deprived quintile).

34  
35  
36  
37  
38  
39  
40 Mortality data was obtained from the Primary Care Mortality Database,[32] a resource developed by The  
41 NHS Information Centre in partnership with the Office for National Statistics (ONS). Data obtained from  
42 ONS records is linked to the general practice where the individual was registered and therefore allows  
43 data to be extracted for specific general practices (i.e. those within HoB PCT). Individuals included in this  
44 analysis were either still registered with a HoB PCT GP at the end of the follow up period or had died  
45 whilst still registered at the practice. The follow up period was 23 months from May 2008 until February  
46 2011. Individuals who had left the included practises during the follow up were excluded from this  
47 analysis (11.1%).

## 50 51 52 **Statistical Analyses**

53  
54 All analyses were performed using PASW statistics 18 for Windows [IBM, Chicago, IL, USA].

55  
56 Measurements for kidney function were divided into categories; eGFR into six categories (15-29, 30-44,  
57 45-59, 60-89, 90-119 and  $\geq 120$  ml/min) with the eGFR range between 90 and 119 ml/min as the  
58  
59  
60

Impact of CKD and comorbidity on mortality in a multi-ethnic population.

reference population. Individuals with an eGFR <15 ml/min were excluded from the analysis. ACR was divided into five categories (<1.1 mg/mmol 'optimal', 1.1-2.99 'high normal', 3-29.99 'high', 30-199.99 'very high' and  $\geq 200$  'nephrotic') in line with the KDIGO consensus conference.[33]

The relationship between age and mortality was not linear. Therefore, age was divided into six categories (50 years and under, 51-60, 61-70, 71-80, 81-90, greater than 90 years) with the youngest group serving as comparator.

Descriptive statistics are presented as mean with standard deviation or median with interquartile range depending on distribution. Continuous variables were compared using ANOVA (normal distribution) with post-hoc Bonferroni analysis or Kruskal-Wallis (non-parametric distribution) tests. Chi-squared tests were used to compare categorical variables.

Cox regression survival analysis was used to evaluate the association of ethnicity and mortality, both before and after adjusting for covariates. Data are presented using survival plots, hazard ratios (HRs) with 95% confidence intervals (95% CI) and p-values. Both univariate (unadjusted) and multivariate (adjusted) regression analyses are presented. The proportionality hazard assumption, assessed using  $\log(-\log(\text{survival function}))$  plots, was met for all covariates.

The association between comorbidity, ethnicity and mortality was assessed by univariate analyses for all risk factors and then presented as three models. Choice of model variables were determined by the availability in the dataset of demographic and clinical risk factors consistent with those utilised by other investigators in previous work in similar populations,[34 ,35] where the variable was available in our target population. Model 1 incorporates the number of identified vascular comorbidities (zero to seven), ethnicity, age, gender, smoking status and SES. Model 2 includes eGFR level with removal of CKD from the comorbidity score (possible scores therefore zero to six) in order to avoid the association between declining renal function and the likelihood of being on the CKD register. Model 3 added ACR to the variables in Model 2.

A complete case model was used in the analyses. All data were complete with the exception of ACR. Therefore data were analysed for all individuals identified (unadjusted, Model 1 and Model 2) and then repeated for individuals who had an ACR recorded (unadjusted and Models 1-3). An 'enter' technique was used for the regression analysis.

## Results

### Complete Cohort

At inception (May 2008) 31,254 individuals fulfilled inclusion criteria for analysis. People of South Asian ethnicity formed the largest ethnic group (16,724, 53.4%), followed by people of white ethnicity (9146, 29.3%) and black ethnicity (5384, 17.2%). Baseline characteristics of the study population are shown in **Table 1**. The age distribution differed between groups with South Asians significantly younger than the other two ethnic groups. There was no significant difference in gender between the three ethnic groups.



Impact of CKD and comorbidity on mortality in a multi-ethnic population.

Smoking was least common in the South Asian group. The majority of all three ethnic groups resided in the most deprived quintile, with a higher proportion of people of South Asian and black ethnicity in this quintile than people of white ethnicity.

For peer review only

1  
2  
3  
4  
5  
6  
7  
8  
9  
10  
11  
12  
13  
14  
15  
16  
17  
18  
19  
20  
21  
22  
23  
24  
25  
26  
27  
28  
29  
30  
31  
32  
33  
34  
35  
36  
37  
38  
39  
40  
41  
42  
43  
44  
45  
46  
47  
48  
49  
50  
51  
52  
53  
54  
55  
56  
57  
58  
59  
60

Impact of CKD and comorbidity on mortality in a multi-ethnic population.

Table 1: Baseline characteristics by ethnicity. Complete Cohort.

|                            |                                        | All               | White             | South Asian       | Black              | p-value |
|----------------------------|----------------------------------------|-------------------|-------------------|-------------------|--------------------|---------|
| <b>Number</b>              | <b>n (%)</b>                           | 31254 (100)       | 9146 (29.3)       | 16724 (53.4)      | 5384 (17.2)        |         |
| <b>Age</b>                 | <b>median (lower, upper quartile)</b>  | 59.0 (50.0,71.0)  | 65.0 (55.0, 75.0) | 56.0 (49.0, 68.0) | 61.0 (48.0, 73.0)  | <0.001  |
|                            | <b>50 and under (%)</b>                | 8421 (26.9)       | 1515 (16.6)       | 5124 (30.6)       | 1782 (33.1)        | <0.001  |
|                            | <b>51-60 (%)</b>                       | 8017 (25.7)       | 1948 (21.3)       | 5170 (30.9)       | 899 (16.7)         |         |
|                            | <b>61-70 (%)</b>                       | 6650 (21.3)       | 2459 (26.9)       | 3206 (19.2)       | 985 (18.3)         |         |
|                            | <b>71-80 (%)</b>                       | 6006 (19.2)       | 2109 (23.1)       | 2568 (15.4)       | 1329 (24.7)        |         |
|                            | <b>81-90 (%)</b>                       | 1974 (6.3)        | 1008 (11.0)       | 604 (3.6)         | 362 (6.7)          |         |
|                            | <b>&gt;90 (%)</b>                      | 186 (0.6)         | 107 (1.2)         | 52 (0.3)          | 27 (0.5)           |         |
| <b>Gender</b>              | <b>female (%)</b>                      | 15248 (48.8)      | 4384 (47.9)       | 8184 (48.9)       | 2680 (49.8)        | 0.085   |
| <b>Smoking</b>             | <b>n (%)</b>                           | 5150 (16.5)       | 2285 (25.0)       | 1812 (10.8)       | 1053 (19.6)        | <0.001  |
| <b>IMD Rank</b>            | <b>Quintile 1 (least deprived) (%)</b> | 152 (0.5)         | 59 (0.6)          | 92 (0.6)          | 1 (0.0)            | <0.001  |
|                            | <b>Quintile 2 (%)</b>                  | 316 (1.0)         | 132 (1.4)         | 173 (1.0)         | 11 (0.2)           |         |
|                            | <b>Quintile 3(%)</b>                   | 3348 (10.7)       | 1860 (20.3)       | 1255 (7.5)        | 233 (4.3)          |         |
|                            | <b>Quintile 4 (%)</b>                  | 5144 (16.5)       | 2243 (24.5)       | 2238 (13.4)       | 663 (12.3)         |         |
|                            | <b>Quintile 5 (most deprived) (%)</b>  | 22294 (71.3)      | 4852 (53.1)       | 12966 (77.5)      | 4476 (83.1)        |         |
| <b>AF</b>                  | <b>n (%)</b>                           | 807 (2.6)         | 515 (5.6)         | 212 (1.3)         | 80 (1.5)           | <0.001  |
| <b>CKD</b>                 | <b>n (%)</b>                           | 3648 (11.7)       | 1318 (14.4)       | 1691 (10.1)       | 639 (11.9)         | <0.001  |
| <b>Diabetes</b>            | <b>n (%)</b>                           | 9931 (31.8)       | 1771 (19.4)       | 6415 (38.4)       | 1745 (32.4)        | <0.001  |
| <b>Heart Failure</b>       | <b>n (%)</b>                           | 822 (2.6)         | 308 (3.4)         | 385 (2.3)         | 129 (2.4)          | <0.001  |
| <b>Hypertension</b>        | <b>n (%)</b>                           | 16505 (52.8)      | 5181 (56.6)       | 8063 (48.2)       | 3261 (60.6)        | <0.001  |
| <b>IHD</b>                 | <b>n (%)</b>                           | 4226 (13.5)       | 1417 (15.5)       | 2386 (14.3)       | 423 (7.9)          | <0.001  |
| <b>Stroke</b>              | <b>n (%)</b>                           | 1476 (4.7)        | 570 (6.2)         | 673 (4.0)         | 233 (4.4)          | <0.001  |
| <b>Comorbidities</b>       | <b>median (lower, upper quartile)</b>  | 1.0 (0.0, 2.0)    | 1.0 (0.0, 2.0)    | 1.0 (0.0, 2.0)    | 1.0 (0.0, 2.0)     | 0.075   |
|                            | <b>0 (%)</b>                           | 9879 (31.6)       | 2829 (30.9)       | 5459 (32.6)       | 1591 (29.6)        | <0.001  |
|                            | <b>1 (%)</b>                           | 10707 (34.3)      | 3253 (35.6)       | 5524 (33)         | 1930 (35.8)        |         |
|                            | <b>2 (%)</b>                           | 6845 (21.9)       | 1898 (20.8)       | 3694 (22.1)       | 1253 (23.3)        |         |
|                            | <b>3 (%)</b>                           | 2667 (8.5)        | 785 (8.6)         | 1451 (8.7)        | 431 (8)            |         |
|                            | <b>4 (%)</b>                           | 828 (2.6)         | 254 (2.8)         | 447 (2.7)         | 127 (2.4)          |         |
|                            | <b>5 (%)</b>                           | 268 (0.9)         | 103 (1.1)         | 124 (0.7)         | 41 (0.8)           |         |
|                            | <b>6 (%)</b>                           | 55 (0.2)          | 23 (0.3)          | 23 (0.1)          | 9 (0.2)            |         |
|                            | <b>7 (%)</b>                           | 5 (<0.1)          | 1 (<0.1)          | 2 (<0.1)          | 2 (<0.1)           |         |
| <b>Creatinine (µmol/L)</b> | <b>mean (SD)</b>                       | 87.0 (25.8)       | 88.2 (24.7)       | 84.6 (25.4)       | 92.3 (28)          | <0.001  |
| <b>eGFR (ml/min)</b>       | <b>median (lower, upper quartile)</b>  | 80.2 (66.7, 94.3) | 74.9 (62.3, 88.8) | 81.3 (68.1, 95.3) | 85.5 (72.3, 100.1) | <0.001  |
|                            | <b>&gt;120 (%)</b>                     | 1473 (4.7)        | 264 (2.9)         | 802 (4.8)         | 407 (7.6)          | <0.001  |
|                            | <b>90-120 (%)</b>                      | 8523 (27.3)       | 1842 (20.1)       | 4841 (28.9)       | 1840 (34.2)        |         |
|                            | <b>60-89 (%)</b>                       | 16373 (52.4)      | 5077 (55.5)       | 8776 (52.5)       | 2520 (46.8)        |         |
|                            | <b>45-59 (%)</b>                       | 3447 (11.0)       | 1389 (15.2)       | 1627 (9.7)        | 431 (8.0)          |         |
|                            | <b>30-44 (%)</b>                       | 1134 (3.6)        | 466 (5.1)         | 517 (3.1)         | 151 (2.8)          |         |
|                            | <b>15-29 (%)</b>                       | 304 (1.0)         | 108 (1.2)         | 161 (1.0)         | 35 (0.7)           |         |
| <b>Died</b>                | <b>n (%)</b>                           | 1435 (4.6)        | 681 (7.4)         | 541 (3.2)         | 213 (4.0)          | <0.001  |

Impact of CKD and comorbidity on mortality in a multi-ethnic population.

The number of vascular comorbidities was similar between groups, with 11-13% of each ethnic group having three or more comorbidities. Prevalence of different vascular comorbidities varied between groups: the white group had a lower reported prevalence of diabetes but a higher prevalence of CKD, atrial fibrillation, heart failure and stroke.

Median eGFR (corrected for ethnicity as appropriate) was 80.2 ml/min and was lowest in the white group (74.9 ml/min compared to 81.3 ml/min for South Asian individuals and 85.5 ml/min for those of black ethnicity;  $p < 0.001$ ). 21.5% of White, 13.8% of South Asian and 11.5% of Black individuals had an eGFR between 15 and 59 ml/min consistent with stage 3-4 CKD.

At the end of the study period a higher proportion of white individuals had died (7.4%) compared to the two other ethnic groups (South Asian 3.2%, Black 4.0%;  $p < 0.001$ ).

### Albumin Creatinine Ratio Cohort

An ACR had been tested in 7022 (42.0%), 2275 (24.9%) and 1908 (20.9%) of South Asian, black and white individuals respectively. **Table 2** lists the baseline characteristics for this subgroup. The median ACR was 1.1 mg/mmol and was highest in the South Asian group (1.2 mg/mmol compared to 1.0 mg/mmol for both white and black individuals;  $p < 0.001$ ). There were similar trends to the whole cohort for age distribution, eGFR, smoking status, and deprivation.

Those with an ACR tested were more likely to have a greater vascular comorbid burden (18-20% having three or more comorbidities). A higher proportion of individuals of South Asian descent, male gender and with diabetes had their ACR tested.

In concordance to the whole group analyses, deaths in the ACR cohort were highest amongst white individuals (7.8%) compared to the South Asian (3.6%) and black individuals (3.7%) ( $p < 0.001$ ).

### Univariate Analysis

The univariate (unadjusted) analysis for the complete cohort (**Table 3a**) demonstrated unadjusted HRs for death of 0.421 (95% CI 0.376 – 0.471,  $p < 0.001$ ) for people of South Asian ethnicity and 0.522 (95% CI 0.447 – 0.609,  $p < 0.001$ ) for people of black ethnicity compared to people of white ethnicity. The mortality rate increased exponentially with age and a higher HR was observed for male gender, current smokers and total number of comorbidities. No difference in mortality was found between deprivation quintiles. Using an eGFR of 90-119 ml/min as reference, a J-shaped relationship was observed with a higher risk of death seen for both higher and lower eGFR values. The HR for death increased progressively by stage of CKD with an eGFR  $< 90$  ml/min.

The univariate analysis was repeated for those individuals who had their ACR reported (**Table 3b**) with similar trends identified to the whole population analysis with the exception of no observed difference between individuals with an eGFR of  $\geq 120$  ml/min compared to 90-119 ml/min. A progressive increase in HR for death was seen with each increasing category for ACR.

Impact of CKD and comorbidity on mortality in a multi-ethnic population.

Table 2: Baseline characteristics by ethnicity. ACR tested cohort.

|                     |                                 | All               | White             | South Asian       | Black             | p-value |
|---------------------|---------------------------------|-------------------|-------------------|-------------------|-------------------|---------|
| Number              | n (%)                           | 11205 (100)       | 1908 (17)         | 7022 (62.7)       | 2275 (20.3)       |         |
| Age (years)         | median (lower, upper quartile)  | 59.0 (50.0, 71.0) | 65.0 (55.0, 75.0) | 57.0 (50.0, 68.0) | 65.0 (49.0, 74.0) | <0.001  |
|                     | 50 and under (%)                | 1900 (25.9)       | 304 (15.9)        | 1961 (27.9)       | 635 (27.9)        | <0.001  |
|                     | 51-60 (%)                       | 3024 (27.0)       | 413 (21.6)        | 2239 (31.9)       | 372 (16.4)        |         |
|                     | 61-70 (%)                       | 2370 (21.2)       | 496 (26.0)        | 1423 (20.3)       | 451 (19.8)        |         |
|                     | 71-80 (%)                       | 2251 (20.1)       | 456 (23.9)        | 1152 (16.2)       | 643 (28.3)        |         |
|                     | 81-90 (%)                       | 611 (5.5)         | 222 (11.6)        | 226 (3.2)         | 163 (7.2)         |         |
|                     | >90 (%)                         | 49 (0.4)          | 17 (0.9)          | 21 (0.3)          | 11 (0.5)          |         |
| Gender              | female (%)                      | 4348 (38.8)       | 682 (35.7)        | 2754 (39.2)       | 912 (40.1)        | 0.008   |
| Smoking             | n (%)                           | 1869 (16.7)       | 518 (27.1)        | 872 (12.4)        | 479 (21.1)        | <0.001  |
| IMD Rank            | Quintile 1 (least deprived) (%) | 30 (0.3)          | 4 (0.2)           | 25 (0.4)          | 1 (0.0)           | <0.001  |
|                     | Quintile 2 (%)                  | 84 (0.7)          | 19 (1.0)          | 60 (0.9)          | 5 (0.2)           |         |
|                     | Quintile 3 (%)                  | 712 (6.4)         | 233 (12.2)        | 540 (5.7)         | 78 (3.4)          |         |
|                     | Quintile 4 (%)                  | 1458 (13.0)       | 339 (17.8)        | 876 (12.5)        | 243 (10.7)        |         |
|                     | Quintile 5 (most deprived) (%)  | 8921 (79.6)       | 1313 (68.8)       | 5660 (80.6)       | 1948 (85.6)       |         |
| AF                  | n (%)                           | 233 (2.1)         | 113 (5.9)         | 91 (1.3)          | 29 (1.3)          | <0.001  |
| CKD                 | n (%)                           | 1637 (14.6)       | 356 (18.7)        | 921 (13.1)        | 360 (15.8)        | <0.001  |
| Diabetes            | n (%)                           | 6828 (60.9)       | 990 (51.9)        | 4505 (62.4)       | 1333 (58.6)       | <0.001  |
| Heart Failure       | n (%)                           | 310 (2.8)         | 74 (3.9)          | 175 (2.5)         | 61 (2.7)          | 0.005   |
| Hypertension        | n (%)                           | 6189 (55.2)       | 1092 (57.2)       | 3679 (52.4)       | 1418 (62.3)       | <0.001  |
| IHD                 | n (%)                           | 1556 (13.9)       | 281 (14.7)        | 1071 (15.3)       | 201 (8.8)         | <0.001  |
| Stroke              | n (%)                           | 480 (4.3)         | 97 (5.1)          | 283 (4.0)         | 100 (4.4)         | 0.126   |
| Comorbidities       | median (lower, upper quartile)  | 1.0 (1.0, 2.0)    | 2.0 (1.0,2.0)     | 1.0 (1.0, 2.0)    | 2.0 (1.0,2.0)     | 0.818   |
|                     | 0 (%)                           | 2510 (22.4)       | 472 (24.7)        | 1514 (21.6)       | 524 (23.0)        | <0.001  |
|                     | 1 (%)                           | 3139 (28.0)       | 466 (24.4)        | 2103 (29.9)       | 870 (25.1)        |         |
|                     | 2 (%)                           | 3438 (30.7)       | 574 (30.1)        | 2093 (29.8)       | 771 (33.9)        |         |
|                     | 3 (%)                           | 1481 (13.2)       | 261 (13.7)        | 928 (13.2)        | 292 (12.8)        |         |
|                     | 4 (%)                           | 448 (4.0)         | 79 (4.1)          | 284 (4.0)         | 85 (3.7)          |         |
|                     | 5 (%)                           | 154 (1.4)         | 46 (2.4)          | 83 (1.2)          | 25 (1.1)          |         |
|                     | 6 (%)                           | 32 (0.3)          | 10 (0.5)          | 15 (0.2)          | 7 (0.3)           |         |
|                     | 7 (%)                           | 3 (<0.1)          | 0 (<0.1)          | 2 (<0.1)          | 1 (<0.1)          |         |
| Creatinine (µmol/L) | mean (SD)                       | 89.1 (27.6)       | 91.8 (26.2)       | 86.2 (26.8)       | 95.8 (29.6)       | <0.001  |
| eGFR (ml/min)       | median (lower, upper quartile)  | 81.1 (66.3, 95.9) | 74.3 (59.7, 89.8) | 82 (67.4, 89.8)   | 84.2 (70.0, 98.9) | <0.001  |
|                     | >120 (%)                        | 611 (5.5)         | 67 (3.5)          | 380 (5.4)         | 164 (7.2)         | <0.001  |
|                     | 90-120 (%)                      | 3234 (28.9)       | 404 (21.2)        | 2091 (29.8)       | 739 (32.5)        |         |
|                     | 60-89 (%)                       | 5451 (48.6)       | 953 (49.9)        | 3453 (49.2)       | 1045 (45.9)       |         |
|                     | 45-59 (%)                       | 1300 (11.6)       | 323 (16.9)        | 750 (10.7)        | 227 (10.0)        |         |
|                     | 30-44 (%)                       | 487 (4.3)         | 131 (6.9)         | 274 (3.9)         | 82 (3.6)          |         |
|                     | 15-29 (%)                       | 122 (1.1)         | 30 (1.6)          | 74 (1.1)          | 18 (0.8)          |         |
| ACR (mg/mmol)       | median (lower, upper quartile)  | 1.1 (0.4, 3.4)    | 1.0 (1.4, 2.8)    | 1.2 (0.5, 3.8)    | 1.0 (0.3, 2.9)    | <0.001  |
|                     | Optimal (<1.1) (%)              | 5641 (50.3)       | 1026 (53.8)       | 3400 (48.4)       | 1214 (53.4)       | <0.001  |
|                     | High Normal (1.1-2.99) (%)      | 2485 (22.2)       | 426 (22.3)        | 1560 (22.2)       | 499 (21.9)        |         |
|                     | High (3.0-29.99) (%)            | 2594 (23.2)       | 402 (21.1)        | 1717 (24.4)       | 475 (20.9)        |         |
|                     | Very High (30 - 200) (%)        | 413 (3.7)         | 49 (2.6)          | 287 (4.1)         | 77 (3.4)          |         |
|                     | Nephrotic (>200) (%)            | 73 (0.7)          | 5 (0.3)           | 58 (0.8)          | 10 (0.4)          |         |
| Died                | n (%)                           | 484 (4.3)         | 149 (7.8)         | 250 (3.6)         | 85 (3.7)          | <0.001  |

Impact of CKD and comorbidity on mortality in a multi-ethnic population.

Table 3: Cox Proportional Hazard Regression Analysis. Univariate (unadjusted) analyses

|               |                             | Complete Cohort (3a)      |           | ACR Tested Cohort (3b)    |           |
|---------------|-----------------------------|---------------------------|-----------|---------------------------|-----------|
|               |                             | Hazard Ratio              | P value   | Hazard Ratio              | P value   |
|               |                             | (95% Confidence Interval) |           | (95% Confidence Interval) |           |
| Ethnicity     | White                       | 1                         | (<0.001*) | 1                         | (<0.001*) |
|               | South Asian                 | 0.421 (0.376 - 0.471)     | <0.001    | 0.444 (0.362 - 0.545)     | <0.001    |
|               | Black                       | 0.522 (0.447 - 0.609)     | <0.001    | 0.467 (0.357 - 0.611)     | <0.001    |
| Age (years)   | 50 and under                | 1                         | (<0.001*) | 1                         | (<0.001*) |
|               | 51-60                       | 2.127 (1.553 - 2.914)     | <0.001    | 1.757 (1.057 - 2.921)     | 0.03      |
|               | 61-70                       | 5.429 (4.078 - 7.228)     | <0.001    | 4.646 (2.926 - 7.345)     | <0.001    |
|               | 71-80                       | 12.971 (9.887 - 17.016)   | <0.001    | 11.363 (7.376 - 17.505)   | <0.001    |
|               | 81-90                       | 32.86 (29.952 - 43.275)   | <0.001    | 24.725 (15.769 - 38.767)  | <0.001    |
|               | >90                         | 90.904 (65.097 - 126.943) | <0.001    | 82.731 (46.684 - 146.612) | <0.001    |
| Gender        | Female as reference         | 1.375 (1.238 - 1.529)     | <0.001    | 1.401 (1.155 - 1.699)     | 0.001     |
| Smoker        | Non-smoker as reference     | 1.154 (1.009 - 1.317)     | 0.036     | 1.259 (1.006 - 1.574)     | 0.044     |
| IMD Rank      | Quintile 1 (least deprived) | 0.860 (0.385 - 1.919)     | 0.713     | <0.001 (<0.001 - >10^5)   | 0.939     |
|               | Quintile 2                  | 0.822 (0.465 - 1.453)     | 0.501     | <0.001 (<0.001 - >10^5)   | 0.897     |
|               | Quintile 3                  | 1.002 (0.846 - 1.186)     | 0.983     | 1.151 (0.818 - 1.619)     | 0.419     |
|               | Quintile 4                  | 0.925 (0.800 - 1.070)     | 0.297     | 0.774 (0.577 - 1.039)     | 0.088     |
|               | Quintile 5 (most deprived)  | 1                         | (0.802*)  | 1                         | (0.42*)   |
| AF            |                             | 5.588 (4.757 - 6.565)     | <0.001    | 6.123 (4.568 - 8.207)     | <0.001    |
| CKD           |                             | 3.442 (3.074 - 3.854)     | <0.001    | 3.498 (2.904 - 4.213)     | <0.001    |
| Diabetes      |                             | 1.346 (1.209 - 1.498)     | <0.001    | 1.939 (1.577 - 2.385)     | <0.001    |
| Heart Failure |                             | 7.622 (6.595 - 8.804)     | <0.001    | 7.279 (5.681 - 9.327)     | <0.001    |
| Hypertension  |                             | 2.079 (1.857 - 2.325)     | <0.001    | 2.05 (1.681 - 2.499)      | <0.001    |
| IHD           |                             | 2.796 (2.495 - 3.132)     | <0.001    | 3.136 (2.592 - 3.795)     | <0.001    |
| Stroke        |                             | 3.654 (3.154 - 4.233)     | <0.001    | 3.709 (2.855 - 4.817)     | <0.001    |
| Comorbidities | 0                           | 1                         | (<0.001*) | 1                         | (<0.001*) |
|               | 1                           | 1.775 (1.487 - 2.118)     | <0.001    | 1.630 (1.094 - 2.430)     | 0.016     |
|               | 2                           | 2.930 (2.458 - 3.493)     | <0.001    | 2.917 (2.023 - 4.205)     | <0.001    |
|               | 3                           | 5.486 (4.550 - 6.615)     | <0.001    | 5.580 (3.837 - 8.113)     | <0.001    |
|               | 4                           | 9.584 (7.691 - 11.942)    | <0.001    | 9.855 (6.511 - 14.917)    | <0.001    |
|               | 5                           | 17.591 (13.490 - 22.939)  | <0.001    | 21.091 (13.479 - 33.001)  | <0.001    |
|               | 6                           | 28.391 (18.411 - 43.782)  | <0.001    | 33.673 (17.519 - 64.722)  | <0.001    |
|               | 7                           | 11.873 (1.664 - 84.728)   | 0.014     | 29.402 (4.031 - 214.462)  | 0.001     |
| eGFR (ml/min) | >120                        | 1.492 (1.110 - 2.007)     | 0.008     | 1.072 (0.603 - 1.903)     | 0.813     |
|               | 90-120                      | 1                         | (<0.001*) | 1                         | (<0.001*) |
|               | 60-89                       | 1.360 (1.162 - 1.591)     | <0.001    | 1.504 (1.138 - 1.987)     | 0.04      |
|               | 45-59                       | 3.849 (3.239 - 4.573)     | <0.001    | 4.255 (3.155 - 5.737)     | <0.001    |
|               | 30-44                       | 6.590 (5.401 - 8.041)     | <0.001    | 7.715 (5.564 - 10.699)    | <0.001    |
|               | 15-29                       | 14.465 (11.341 - 18.450)  | <0.001    | 15.054 (9.942 - 22.796)   | <0.001    |
| ACR (mg/mmol) | Optimal (<1.1)              |                           |           | 1                         | (<0.001*) |
|               | High Normal (1.1-2.99)      |                           |           | 1.363 (1.038 - 1.788)     | 0.026     |
|               | High (3.0-29.99)            |                           |           | 2.967 (2.381 - 3.697)     | <0.001    |
|               | Very High (30 - 200)        |                           |           | 6.253 (4.493 - 14.005)    | <0.001    |
|               | Nephrotic (>200)            |                           |           | 7.932 (4.493 - 14.005)    | <0.001    |

\* P-value for overall effect

Impact of CKD and comorbidity on mortality in a multi-ethnic population.

## Multivariate Analysis

Following adjustment for covariates the differences in ethnicity remained; people of South Asian and black ethnicities had a lower HR for death in all analyses.

Model 1 (complete cohort, incorporating the number of identified comorbidities, see **Supplementary Table I**) analysed the complete cohort and showed an adjusted HR for death of 0.673 (95% CI 0.595 – 0.761,  $p < 0.001$ ) for people of South Asian ethnicity and 0.592 (95% CI 0.504 – 0.696,  $p < 0.001$ ) for people of black ethnicity compared to people of white ethnicity. When the analysis was restricted to the cohort with ACR tests available the HR for death was 0.757 (95% CI 0.61 – 0.939,  $p = 0.011$ ) for people of South Asian ethnicity and 0.526 for people of black ethnicity (95% CI 0.4 – 0.692,  $p < 0.001$ ) compared to people of white ethnicity. For the complete cohort, mortality risk was lower in IMD quintiles 3 and 4 (compared to the most deprived quintile 5). No significant difference between IMD quintiles was identified in the ACR cohort. Increasing age (51 and over in complete cohort, 61 and over in ACR cohort), smoking status and male gender was significant in analyses for both cohorts. An increased HR for death was observed for two or more comorbidities, with the HR increasing as the number of comorbidities increased.

Kidney function (eGFR) was incorporated into Model 2 (with the removal of CKD from the comorbidity score, see **Supplementary Table I**) and in the complete cohort the HR for people of South-Asian ethnicity was 0.678 (95% CI 0.6 – 0.767  $p < 0.001$ ) and for people of black ethnicity was 0.789 (95% CI 0.635 – 0.98,  $p = 0.032$ ) compared to people of white ethnicity. Similarly, when the analysis was restricted to the cohort of patients with ACR tests available people of South Asian and Black ethnicity had a lower proportion of deaths compared to people of white ethnicity with HRs of 0.614 (95% CI 0.522 – 0.722,  $p < 0.001$ ) and 0.575 (95% CI 0.435 – 0.759,  $p < 0.001$ ) respectively. In the complete cohort mortality risk was lower in the IMD quintile 4. More than two comorbidities were associated with an increasing HR and an increased HR of death compared to the reference eGFR range (90-119 ml/min) was seen with an eGFR  $\geq 120$  ml/min and  $\geq 45$  ml/min. An eGFR of 60-89 ml/min was associated with a lower HR. In the analysis of those with ACR tested, an eGFR  $< 60$  ml/min was associated with progressively higher HR by CKD stage.

In model 3 (all vascular comorbidities except CKD and the addition of eGFR and ACR, **Table 4**) the HR for death for people of South Asian ethnicity was 0.697 (95% CI 0.56 – 0.868,  $p = 0.001$ ) and for people of black ethnicity was 0.533 (95% CI 0.403 – 0.704,  $p < 0.001$ ) compared to people of white ethnicity (**Figure 2**). Older age, male gender, being a current smoker and increasing comorbidity (two or more) were associated with an increased HR of death (**Figure 3**). An ACR of 'high' or greater (i.e.  $\geq 3.0$  mg/mmol) and an eGFR  $< 45$  ml/min was also associated with an increased HR for death. No significant differences in HRs were observed between deprivation quintiles.

Impact of CKD and comorbidity on mortality in a multi-ethnic population.

Table 4: Cox Proportional Hazard Regression Analysis. Multivariate (adjusted) analyses. Model 3.

|               |                             | ACR Tested Cohort                         |           |
|---------------|-----------------------------|-------------------------------------------|-----------|
|               |                             | Hazard Ratio<br>(95% Confidence Interval) | P value   |
| Ethnicity     | White                       | 1                                         | (<0.001*) |
|               | South Asian                 | 0.697 (0.56 - 0.868)                      | 0.001     |
|               | Black                       | 0.533 (0.403 - 0.704)                     | <0.001    |
| Age (years)   | 50 and under                | 1                                         | (<0.001*) |
|               | 51-60                       | 1.519 (0.907 - 2.546)                     | 0.112     |
|               | 61-70                       | 3.521 (2.17 - 5.712)                      | <0.001    |
|               | 71-80                       | 7.381 (4.61 - 11.818)                     | <0.001    |
|               | 81-90                       | 15.721 (9.534 - 25.922)                   | <0.001    |
|               | >90                         | 51.641 (27.889 - 95.621)                  | <0.001    |
| Gender        | Female as reference         | 1.782 (1.46 - 2.176)                      | <0.001    |
| Smoker        | Non-smoker as reference     | 1.886 (1.488 - 2.392)                     | <0.001    |
| IMD Rank      | Quintile 1 (least deprived) | <0.001 (<0.001 - >10^5)                   | 0.952     |
|               | Quintile 2                  | <0.001 (<0.001 - >10^5)                   | 0.913     |
|               | Quintile 3                  | 0.978 (0.68 - 1.387)                      | 0.902     |
|               | Quintile 4                  | 0.788 (0.585 - 1.062)                     | 0.118     |
|               | Quintile 5 (most deprived)  | 1                                         | (0.65*)   |
| Comorbidities | 0                           | 1                                         | (<0.001*) |
|               | 1                           | 1.371 (0.932 - 2.016)                     | 0.109     |
|               | 2                           | 1.486 (1.019 - 2.166)                     | 0.039     |
|               | 3                           | 2.29 (1.53 - 3.428)                       | <0.001    |
|               | 4                           | 3.153 (2.002 - 4.964)                     | <0.001    |
|               | 5                           | 5.141 (2.869 - 9.212)                     | <0.001    |
| eGFR (ml/min) | >120                        | 1.396 (0.782 - 2.492)                     | 0.26      |
|               | 90-120                      | 1                                         | (<0.001*) |
|               | 60-89                       | 0.907 (0.982 - 1.207)                     | 0.505     |
|               | 45-59                       | 1.282 (0.932 - 1.763)                     | 0.126     |
|               | 30-44                       | 1.566 (1.095 - 2.239)                     | 0.014     |
|               | 15-29                       | 2.073 (1.315 - 3.268)                     | 0.002     |
| ACR (mg/mmol) | Optimal (<1.1)              | 1                                         | (<0.001*) |
|               | High Normal (1.1-2.99)      | 1.032 (0.784 - 1.359)                     | 0.821     |
|               | High (3.0-29.99)            | 1.837 (1.464 - 2.305)                     | <0.001    |
|               | Very High (30 - 200)        | 2.956 (2.132 - 4.099)                     | <0.001    |
|               | Nephrotic (>200)            | 3.838 (2.108 - 6.985)                     | <0.001    |

\* P-value for overall effect

Impact of CKD and comorbidity on mortality in a multi-ethnic population.

## Discussion

This study utilised routinely available clinical and laboratory data, including kidney function assessed by eGFR and ACR, from a large primary care population. We included in the analysis detailed SES and, importantly, studied three ethnic groups, South-Asian, black and white. Prior to this research, there has been uncertainty about the impact of ethnicity and SES on clinical outcomes in people with significant comorbidities including CKD. The comprehensive nature of the dataset coupled with the ability to utilise the Primary Care Mortality Database has allowed us to assess the relative impact of these factors on survival.

We found that previous associations between lower eGFR and higher ACR and increased mortality applied to this population. Furthermore, these associations remained significant when adjusted for ethnicity, age, gender, cardiovascular risk factors and SES. These results add weight to the risk stratification benefit of measuring ACR has in high risk groups.

A strong cumulative impact of comorbidity on CKD and ethnicity was shown. Whereas traditional comorbidity scores such as the Charlson Comorbidity Index [36] are difficult to calculate accurately in a large primary care setting, our study demonstrates that a simple cumulative score provides prognostic information. Individual comorbidities were present in varying frequencies within different ethnic groups, a finding consistent with that found in other ethnically diverse populations.[37] Whilst individual comorbidities were associated with different mortality risks, we found the cumulative effect of comorbidities conveyed the greatest prognostic implication. A similar approach, but also including non-cardiovascular risk factors has recently been described.[38] Our study suggests that routinely collected clinical data concerning cumulative comorbidity may be utilised to quantify risk, however further work would be required to validate this as a tool for use in clinical care.

SES was measured by the IMD 2007 score; a cumulative deprivation index score incorporating seven areas of deprivation which has been validated as superior to other deprivation scores.[31] One notable finding is that we did not demonstrate any association between mortality when corrected for all other factors including comorbidity and ethnicity. This is not consistent with several other studies, which have shown that there is an independent relationship between SES and mortality across disease states and ethnic groups within the UK.[39-42] This relationship varies by population group studied [43] and there have been limited studies investigating health disparities in similar, inner-city populations. Whilst we studied a health care system that is free at the point of care, limiting possible health access issues, the majority of individuals were from the most deprived national quintile and our study may therefore underestimate the influence of the complete spectrum of SES on mortality. To attempt to correct for this, we re-ran the analyses dividing the cohort into equal quintiles. All analyses continued to indicate the effect of ethnicity and the importance of cardiovascular comorbidity and renal function. The univariate



Impact of CKD and comorbidity on mortality in a multi-ethnic population.

1  
2  
3 analysis (**Supplementary Table II**) and the most comprehensive multivariate analysis (Model 3,  
4 (**Supplementary Table III**) did not show any differences between most and least deprived quintiles.  
5

6  
7 One of the seven areas included in the IMD is health deprivation, raising the possibility of an inbuilt  
8 relationship between deprivation and health even before analyses are undertaken. The possible  
9 implication of this was investigated by Adams and White [44] who analysed data having removed the  
10 health domain from IMD 2004 and found that its removal had little, practical, effect. This suggests the  
11 presence of the health domain is unlikely to influence our result.  
12

13  
14 We found that the risk of death was lower for people of South Asian and black ethnicity compared to  
15 people of white ethnicity, and this remained in all analyses (adjusted and unadjusted) performed.  
16 Previous studies comparing the outcomes of different ethnic groups have been limited in their  
17 generalizability. They have either looked at disease specific mortality [8,18,20,21] or have been based  
18 in populations that do not have access to free comprehensive healthcare. The finding that differences in  
19 mortality risk between ethnic groups is independent of age, gender, SES, kidney function and  
20 comorbidities require further work. Variables, such as health promotion targeted at specific groups,  
21 differences in medication usage or factors related to genetic diversity may offer potential explanations for  
22 this variation. [45,46].  
23

24  
25 A major strength in this study is the sample size, which included sixty-two practices of varying list size  
26 and number of practitioners. Ethnicity was documented in over 80% of the population studied; this is,  
27 much higher than normally found in primary care records.[47] Self-reporting is considered the 'gold  
28 standard' method of assessing ethnicity,[27] taking into account an individual's culture and self-identity.  
29 Renal function was described in terms of eGFR and ACR, the latter becoming of increased prominence in  
30 the stratification of cardiovascular risk.  
31

32  
33 Our analyses have used data from primary care coding and recording systems, which formed part of the  
34 electronic downloads. These downloads indicate who is on a specific cardiovascular risk register and  
35 therefore may not classify people correctly. There is a relative paucity of published literature regarding  
36 the correct identification of people onto the correct risk registers [23,48][49,50]. Surrogate measures of  
37 accuracy of the data include previous studies looking at gaming for QOF points (falsely classifying people  
38 with conditions they do not have thereby increasing revenue) or exception reporting (excluding  
39 individuals who have not had the appropriate monitoring completed) suggest that both these are rare.[23  
40 ,51,52]  
41

42  
43 When comparing the breakdown of the population studied in these analyses to the source population, it is  
44 important to highlight two key differences. Firstly, there is a relative underrepresentation of individuals  
45 of white ethnicity, consistent with previous research.[53] This is most marked in those who had their  
46 ACR measured; a higher number of males and individuals with diabetes or of South Asian ethnicity had an  
47 ACR measured. Comparing the whole cohort to those who had their ACR reported showed similar trends  
48 for mortality in respect of age, eGFR, smoking status and SES, suggests a generalizability of results.  
49  
50  
51  
52  
53  
54  
55  
56  
57  
58  
59  
60

Impact of CKD and comorbidity on mortality in a multi-ethnic population.

1  
2  
3 Secondly one criterion for inclusion was the recording of renal function within the previous twelve  
4 months. This is likely to have resulted in an overrepresentation of comorbidity as people with CV  
5 conditions would be more likely to have their renal function checked. A further consideration is that the  
6 accuracy and applicability of creatinine based eGFR equations, such as the formula used in this analysis,  
7 in non-white ethnic groups is a subject of ongoing research.[54-56] Cystatin based equations may be  
8 more accurate,[57] but are not routinely measured in clinical practice.  
9  
10

11  
12 In summary, we have shown the determinants of mortality were multifactorial in a high risk population  
13 and that ethnicity should be considered as a non-traditional risk factor for mortality; the HR for death  
14 was lower for South Asian and black individuals compared to white individuals which was, in part,  
15 independent of age, gender, SES, renal function and comorbidities. Furthermore, a simple cumulative  
16 comorbidity system may have prognostic utility. Renal function (eGFR and ACR) provides additional  
17 information and gender, age and smoking status remain significant risk factors for mortality.  
18  
19  
20  
21  
22  
23  
24  
25  
26  
27  
28  
29  
30  
31  
32  
33  
34  
35  
36  
37  
38  
39  
40  
41  
42  
43  
44  
45  
46  
47  
48  
49  
50  
51  
52  
53  
54  
55  
56  
57  
58  
59  
60

Impact of CKD and comorbidity on mortality in a multi-ethnic population.

## Acknowledgements

none

## Competing Interests

Mark Jesky has received funding from JABBS foundation

AC Felix Burden has advised and received honoraria from Enhanced Healthcare Services Ltd

## Funding

This research received no specific grant from any funding agency in the public, commercial or not-for-profit sectors

## Contributorship

Mark Jesky: study design, data analysis, preparation of manuscript

Amanda Lambert: study design, data acquisition and analysis, review of manuscript

AC Felix Burden: study design, data acquisition, review of manuscript

Paul Cockwell: study design, data analysis, preparation and review of manuscript

## Data sharing

No other data will be available.

## Figure legends

Figure 1. Flow Diagram indicating selection process for inclusion in the analyses

Figure 2. Cox Regression Survival Plot indicating cumulative survival between ethnicities in Model 3 (comorbidities, eGFR and ACR). Table below survival plot demonstrates number of individuals who remained in follow up at each time-point.

Figure 3. Hazard ratio (HR) for death by number of comorbidities. Multivariate (adjusted) analysis: Model 3

Impact of CKD and comorbidity on mortality in a multi-ethnic population.

## References

1. Go AS, Chertow GM, Fan D, et al. Chronic kidney disease and the risks of death, cardiovascular events, and hospitalization. *The New England journal of medicine* 2004;**351**(13):1296-305 doi: 10.1056/NEJMoa041031[published Online First: Epub Date]].
2. Matsushita K, van der Velde M, Astor BC, et al. Association of estimated glomerular filtration rate and albuminuria with all-cause and cardiovascular mortality in general population cohorts: a collaborative meta-analysis. *Lancet* 2010;**375**(9731):2073-81 doi: 10.1016/S0140-6736(10)60674-5[published Online First: Epub Date]].
3. Astor BC, Matsushita K, Gansevoort RT, et al. Lower estimated glomerular filtration rate and higher albuminuria are associated with mortality and end-stage renal disease. A collaborative meta-analysis of kidney disease population cohorts. *Kidney international* 2011;**79**(12):1331-40 doi: 10.1038/ki.2010.550[published Online First: Epub Date]].
4. Gansevoort RT, Matsushita K, van der Velde M, et al. Lower estimated GFR and higher albuminuria are associated with adverse kidney outcomes. A collaborative meta-analysis of general and high-risk population cohorts. *Kidney international* 2011;**80**(1):93-104 doi: 10.1038/ki.2010.531[published Online First: Epub Date]].
5. Zhang QL, Rothenbacher D. Prevalence of chronic kidney disease in population-based studies: systematic review. *BMC Public Health* 2008;**8**:117 doi: 10.1186/1471-2458-8-117[published Online First: Epub Date]].
6. Coresh J, Selvin E, Stevens LA, et al. Prevalence of chronic kidney disease in the United States. *Jama* 2007;**298**(17):2038-47 doi: 10.1001/jama.298.17.2038[published Online First: Epub Date]].
7. Peralta CA, Katz R, Deboer I, et al. Racial and Ethnic Differences in Kidney Function Decline among Persons without Chronic Kidney Disease. *J Am Soc Nephrol* 2011;**22**(7):1327-34 doi: 10.1681/ASN.2010090960[published Online First: Epub Date]].
8. Barbour SJ, Er L, Djurdjev O, et al. Differences in progression of CKD and mortality amongst Caucasian, Oriental Asian and South Asian CKD patients. *Nephrol Dial Transplant* 2010;**25**(11):3663-72 doi: 10.1093/ndt/gfq189[published Online First: Epub Date]].
9. Choi AI, Rodriguez RA, Bacchetti P, et al. White/black racial differences in risk of end-stage renal disease and death. *Am J Med* 2009;**122**(7):672-8 doi: 10.1016/j.amjmed.2008.11.021[published Online First: Epub Date]].
10. Crews DC, Sozio SM, Liu Y, et al. Inflammation and the paradox of racial differences in dialysis survival. *J Am Soc Nephrol* 2011;**22**(12):2279-86 doi: 10.1681/ASN.2011030305[published Online First: Epub Date]].
11. Hallan SI, Matsushita K, Sang Y, et al. Age and association of kidney measures with mortality and end-stage renal disease. *JAMA : the journal of the American Medical Association* 2012;**308**(22):2349-60 doi: 10.1001/jama.2012.16817[published Online First: Epub Date]].
12. Herzog CA, Asinger RW, Berger AK, et al. Cardiovascular disease in chronic kidney disease. A clinical update from Kidney Disease: Improving Global Outcomes (KDIGO). *Kidney Int* 2011;**80**(6):572-86 doi: 10.1038/ki.2011.223[published Online First: Epub Date]].
13. Mahmoodi BK, Matsushita K, Woodward M, et al. Associations of kidney disease measures with mortality and end-stage renal disease in individuals with and without

Impact of CKD and comorbidity on mortality in a multi-ethnic population.

- hypertension: a meta-analysis. *Lancet* 2012;**380**(9854):1649-61 doi: 10.1016/S0140-6736(12)61272-0[published Online First: Epub Date]].
14. Benjamin EJ, Wolf PA, D'Agostino RB, et al. Impact of atrial fibrillation on the risk of death: the Framingham Heart Study. *Circulation* 1998;**98**(10):946-52
15. Ford ES. Trends in mortality from all causes and cardiovascular disease among hypertensive and nonhypertensive adults in the United States. *Circulation* 2011;**123**(16):1737-44 doi: 10.1161/CIRCULATIONAHA.110.005645[published Online First: Epub Date]].
16. Afkarian M, Sachs MC, Kestenbaum B, et al. Kidney disease and increased mortality risk in type 2 diabetes. *J Am Soc Nephrol* 2013;**24**(2):302-8 doi: 10.1681/ASN.2012070718[published Online First: Epub Date]].
17. Bahrami H, Kronmal R, Bluemke DA, et al. Differences in the incidence of congestive heart failure by ethnicity: the multi-ethnic study of atherosclerosis. *Arch Intern Med* 2008;**168**(19):2138-45 doi: 10.1001/archinte.168.19.2138[published Online First: Epub Date]].
18. Balarajan R. Ethnic differences in mortality from ischaemic heart disease and cerebrovascular disease in England and Wales. *Bmj* 1991;**302**(6776):560-4
19. Cappuccio FP. Ethnicity and cardiovascular risk: variations in people of African ancestry and South Asian origin. *J Hum Hypertens* 1997;**11**(9):571-6
20. Khan NA, Wang H, Anand S, et al. Ethnicity and sex affect diabetes incidence and outcomes. *Diabetes Care* 2011;**34**(1):96-101 doi: 10.2337/dc10-0865[published Online First: Epub Date]].
21. Chaturvedi N, Jarrett J, Morrish N, et al. Differences in mortality and morbidity in African Caribbean and European people with non-insulin dependent diabetes mellitus: results of 20 year follow up of a London cohort of a multinational study. *Bmj* 1996;**313**(7061):848-52
22. Shekelle P. New contract for general practitioners. *Bmj* 2003;**326**(7387):457-8 doi: 10.1136/bmj.326.7387.457[published Online First: Epub Date]].
23. Calvert M, Shankar A, McManus RJ, et al. Effect of the quality and outcomes framework on diabetes care in the United Kingdom: retrospective cohort study. *Bmj* 2009;**338**:b1870 doi: 10.1136/bmj.b1870[published Online First: Epub Date]].
24. PEEG, Current Estimates, Population Estimates by Ethnic Group Mid-2002-2008 for Primary Care Organisations (experimental). Secondary PEEG, Current Estimates, Population Estimates by Ethnic Group Mid-2002-2008 for Primary Care Organisations (experimental) 02/03/2009 2008. <http://www.ons.gov.uk/ons/taxonomy/index.html?nscl=Population+Estimates+by+Ethnic+Group>.
25. National Institute for Health and Clinical Excellence: CG73: Chronic Kidney Disease. Secondary National Institute for Health and Clinical Excellence: CG73: Chronic Kidney Disease 2008. <http://www.nice.org.uk/CG73>.
26. Centre HaSCI. Quality and Outcomes Framework. Secondary Quality and Outcomes Framework. [www.hscic.gov.uk/qof](http://www.hscic.gov.uk/qof).
27. Saunders CL, Abel GA, El Turabi A, et al. Accuracy of routinely recorded ethnic group information compared with self-reported ethnicity: evidence from the English Cancer Patient Experience survey. *BMJ Open* 2013;**3**(6) doi: 10.1136/bmjopen-2013-002882[published Online First: Epub Date]].
28. Levey AS, Bosch JP, Lewis JB, et al. A more accurate method to estimate glomerular filtration rate from serum creatinine: a new prediction equation. Modification of Diet in Renal Disease Study Group. *Ann Intern Med* 1999;**130**(6):461-70
29. Index of Multiple Deprivation (IMD) 2007. Secondary Index of Multiple Deprivation (IMD) 2007 26/1/2013 2007. [http://data.gov.uk/dataset/index\\_of\\_multiple\\_deprivation\\_imd\\_2007](http://data.gov.uk/dataset/index_of_multiple_deprivation_imd_2007).
30. Townsend P, Phillimore P, Beattie A. *Health and deprivation: inequality and the north*. London: Croom Helm, 1988.

Impact of CKD and comorbidity on mortality in a multi-ethnic population.

31. Jordan H, Roderick P, Martin D. The Index of Multiple Deprivation 2000 and accessibility effects on health. *J Epidemiol Community Health* 2004;**58**(3):250-7
32. Centre HSCI. Primary Care Mortality Database. Secondary Primary Care Mortality Database. <http://www.hscic.gov.uk/pcmdatabase>.
33. Levey AS, de Jong PE, Coresh J, et al. The definition, classification, and prognosis of chronic kidney disease: a KDIGO Controversies Conference report. *Kidney Int* 2011;**80**(1):17-28 doi: 10.1038/ki.2010.483[published Online First: Epub Date]].
34. Abbasi A, Peelen LM, Corpeleijn E, et al. Prediction models for risk of developing type 2 diabetes: systematic literature search and independent external validation study. *Bmj* 2012;**345**:e5900 doi: 10.1136/bmj.e5900[published Online First: Epub Date]].
35. Smith S, Waterall J, Burden AC. An evaluation of the performance of the NHS Health Check programme in identifying people at high risk of developing type 2 diabetes. *BMJ Open* 2013;**3**(3) doi: 10.1136/bmjopen-2012-002219[published Online First: Epub Date]].
36. Charlson ME, Pompei P, Ales KL, et al. A new method of classifying prognostic comorbidity in longitudinal studies: development and validation. *J Chronic Dis* 1987;**40**(5):373-83
37. Khunti K, Morris DH, Weston CL, et al. Joint prevalence of diabetes, impaired glucose regulation, cardiovascular disease risk and chronic kidney disease in South Asians and White Europeans. *PLoS One* 2013;**8**(1):e55580 doi: 10.1371/journal.pone.0055580[published Online First: Epub Date]].
38. Carey IM, Shah SM, Harris T, et al. A new simple primary care morbidity score predicted mortality and better explains between practice variations than the Charlson index. *J Clin Epidemiol* 2013;**66**(4):436-44 doi: 10.1016/j.jclinepi.2012.10.012[published Online First: Epub Date]].
39. Johnson-Lawrence V, Kaplan G, Galea S. Socioeconomic mobility in adulthood and cardiovascular disease mortality. *Ann Epidemiol* 2013;**23**(4):167-71 doi: 10.1016/j.annepidem.2013.02.004[published Online First: Epub Date]].
40. Lazzarino AI, Hamer M, Stamatakis E, et al. The combined association of psychological distress and socioeconomic status with all-cause mortality: a national cohort study. *JAMA Intern Med* 2013;**173**(1):22-7 doi: 10.1001/2013.jamainternmed.951[published Online First: Epub Date]].
41. Jackson CA, Jones NR, Walker JJ, et al. Area-based socioeconomic status, type 2 diabetes and cardiovascular mortality in Scotland. *Diabetologia* 2012;**55**(11):2938-45 doi: 10.1007/s00125-012-2667-1[published Online First: Epub Date]].
42. Gallo V, Mackenbach JP, Ezzati M, et al. Social inequalities and mortality in Europe--results from a large multi-national cohort. *PLoS One* 2012;**7**(7):e39013 doi: 10.1371/journal.pone.0039013[published Online First: Epub Date]].
43. Levene LS, Bankart J, Khunti K, et al. Association of primary care characteristics with variations in mortality rates in England: an observational study. *PLoS One* 2012;**7**(10):e47800 doi: 10.1371/journal.pone.0047800[published Online First: Epub Date]].
44. Adams J, White M. Removing the health domain from the Index of Multiple Deprivation 2004-effect on measured inequalities in census measure of health. *J Public Health (Oxf)* 2006;**28**(4):379-83 doi: 10.1093/pubmed/fdl061[published Online First: Epub Date]].
45. Conley J, Tonelli M, Quan H, et al. Association Between GFR, Proteinuria, and Adverse Outcomes Among White, Chinese, and South Asian Individuals in Canada. *Am J Kidney Dis* 2011 doi: 10.1053/j.ajkd.2011.09.022[published Online First: Epub Date]].
46. Buckalew VM, Jr., Freedman BI. Reappraisal of the impact of race on survival in patients on dialysis. *Am J Kidney Dis* 2010;**55**(6):1102-10 doi: 10.1053/j.ajkd.2009.10.062[published Online First: Epub Date]].
47. Raleigh VS. Collection of data on ethnic origin in England. *Bmj* 2008;**337**:a1107 doi: 10.1136/bmj.a1107[published Online First: Epub Date]].
48. Lambert AM, Burden AC, Chambers J, et al. Cardiovascular screening for men at high risk in Heart of Birmingham Teaching Primary Care Trust: the 'Deadly Trio' programme. *J*

Impact of CKD and comorbidity on mortality in a multi-ethnic population.

- 1  
2  
3 Public Health (Oxf) 2011 doi: 10.1093/pubmed/fdr052[published Online First: Epub  
4 Date]].
- 5 49. Humphreys J, Harvey G, Coleiro M, et al. A collaborative project to improve identification and  
6 management of patients with chronic kidney disease in a primary care setting in Greater  
7 Manchester. *BMJ Qual Saf* 2012;**21**(8):700-8 doi: 10.1136/bmjqs-2011-  
8 000664[published Online First: Epub Date]].
- 9 50. Martin D, Wright JA. Disease prevalence in the English population: a comparison of primary  
10 care registers and prevalence models. *Soc Sci Med* 2009;**68**(2):266-74 doi:  
11 10.1016/j.socscimed.2008.10.021[published Online First: Epub Date]].
- 12 51. Doran T, Fullwood C, Reeves D, et al. Exclusion of patients from pay-for-performance targets  
13 by English physicians. *N Engl J Med* 2008;**359**(3):274-84 doi:  
14 10.1056/NEJMsa0800310[published Online First: Epub Date]].
- 15 52. Campbell S, Hannon K, Lester H. Exception reporting in the Quality and Outcomes  
16 Framework: views of practice staff - a qualitative study. *Br J Gen Pract*  
17 2011;**61**(585):183-9 doi: 10.3399/bjgp11X567117[published Online First: Epub Date]].
- 18 53. de Lusignan S, Nitsch D, Belsey J, et al. Disparities in testing for renal function in UK primary  
19 care: cross-sectional study. *Fam Pract* 2011 doi: 10.1093/fampra/cm036[published  
20 Online First: Epub Date]].
- 21 54. Delanaye P, Cavalier E, Mariat C, et al. Estimating glomerular filtration rate in Asian subjects:  
22 where do we stand? *Kidney Int* 2011;**80**(5):439-40 doi: 10.1038/ki.2011.197[published  
23 Online First: Epub Date]].
- 24 55. Delanaye P, Mariat C, Maillard N, et al. Are the creatinine-based equations accurate to  
25 estimate glomerular filtration rate in African American populations? *Clin J Am Soc*  
26 *Nephrol* 2011;**6**(4):906-12 doi: 10.2215/CJN.10931210[published Online First: Epub  
27 Date]].
- 28 56. Matsushita K, Mahmoodi BK, Woodward M, et al. Comparison of risk prediction using the  
29 CKD-EPI equation and the MDRD study equation for estimated glomerular filtration rate.  
30 *Jama* 2012;**307**(18):1941-51 doi: 10.1001/jama.2012.3954[published Online First:  
31 Epub Date]].
- 32 57. Teo BW, Xu H, Wang D, et al. Estimating glomerular filtration rates by use of both cystatin C  
33 and standardized serum creatinine avoids ethnicity coefficients in Asian patients with  
34 chronic kidney disease. *Clin Chem* 2012;**58**(2):450-7 doi:  
35 10.1373/clinchem.2011.172346[published Online First: Epub Date]].  
36  
37  
38  
39  
40  
41  
42  
43  
44  
45  
46  
47  
48  
49  
50  
51  
52  
53  
54  
55  
56  
57  
58  
59  
60

Impact of CKD and comorbidity on mortality in a multi-ethnic population.  
 Jesky et al.  
 Supplementary Tables

**Supplementary Table 1:** Cox Proportional Hazard Regression Analysis. National IMD quintiles. Multivariate (adjusted) analyses

|               |                             | Model 1                   |          |                                     |          | Model 2                   |          |                                     |          |
|---------------|-----------------------------|---------------------------|----------|-------------------------------------|----------|---------------------------|----------|-------------------------------------|----------|
|               |                             | Complete Cohort           |          | ACR Tested Cohort                   |          | Complete Cohort           |          | ACR Tested Cohort                   |          |
|               |                             | Hazard Ratio              | P value  | Hazard Ratio                        | P value  | Hazard Ratio              | P value  | Hazard Ratio                        | P value  |
|               |                             | (95% Confidence Interval) |          | (95% Confidence Interval)           |          | (95% Confidence Interval) |          | (95% Confidence Interval)           |          |
| Ethnicity     | White                       | 1                         | <0.001*  | 1                                   | <0.001*  | 1                         | <0.001*  | 1                                   | <0.001*  |
|               | South Asian                 | 0.673 (0.595 - 0.761)     | <0.001   | 0.757 (0.61 - 0.939)                | 0.011    | 0.678 (0.6 - 0.767)       | <0.001   | 0.789 (0.635 - 0.98)                | 0.032    |
|               | Black                       | 0.592 (0.504 - 0.696)     | <0.001   | 0.526 (0.4 - 0.692)                 | <0.001   | 0.614 (0.522 - 0.722)     | <0.001   | 0.575 (0.435 - 0.759)               | <0.001   |
| Age (years)   | 50 and under                | 1                         | <0.001*  | 1                                   | <0.001*  | 1                         | <0.001*  | 1                                   | <0.001*  |
|               | 51-60                       | 1.958 (1.425 - 2.691)     | <0.001   | 1.538 (0.919 - 2.573)               | 0.101    | 2.09 (1.52 - 2.874)       | <0.001   | 1.571 (0.937 - 2.632)               | 0.086    |
|               | 61-70                       | 4.512 (3.358 - 6.062)     | <0.001   | 3.634 (2.252 - 5.867)               | <0.001   | 4.918 (3.651 - 6.625)     | <0.001   | 3.697 (2.278 - 6.002)               | <0.001   |
|               | 71-80                       | 10.075 (7.568 - 13.412)   | <0.001   | 8.124 (5.122 - 12.887)              | <0.001   | 10.904 (8.153 - 14.582)   | <0.001   | 7.95 (4.962 - 12.738)               | <0.001   |
|               | 81-90                       | 23.973 (17.839 - 32.217)  | <0.001   | 17.018 (10.444 - 27.73)             | <0.001   | 25.203 (18.626 - 34.104)  | <0.001   | 16.155 (9.79 - 26.659)              | <0.001   |
|               | >90                         | 68.62 (48.166 - 97.759)   | <0.001   | 61.221 (33.372 - 112.31)            | <0.001   | 68.189 (47.554 - 97.777)  | <0.001   | 52.695 (28.401 - 97.77)             | <0.001   |
| Gender        | Female as reference         | 1.451 (1.303 - 1.616)     | <0.001   | 1.806 (1.48 - 2.203)                | <0.001   | 1.447 (1.298 - 1.612)     | <0.001   | 1.819 (1.491 - 2.22)                | <0.001   |
| Smoker        | Non-smoker as reference     | 1.722 (1.495 - 1.983)     | <0.001   | 1.986 (1.567 - 2.517)               | <0.001   | 1.692 (1.469 - 1.95)      | <0.001   | 1.959 (1.546 - 2.483)               | <0.001   |
| IMD Rank      | Quintile 1 (least deprived) | 1.081 (0.484 - 2.416)     | 0.849    | <0.001 (<0.001 - >10 <sup>5</sup> ) | 0.951    | 1.115 (0.499 - 2.494)     | 0.79     | <0.001 (<0.001 - >10 <sup>5</sup> ) | 0.951    |
|               | Quintile 2                  | 0.906 (0.512 - 1.603)     | 0.734    | <0.001 (<0.001 - >10 <sup>5</sup> ) | 0.916    | 0.896 (0.506 - 1.587)     | 0.707    | <0.001 (<0.001 - >10 <sup>5</sup> ) | 0.917    |
|               | Quintile 3                  | 0.821 (0.689 - 0.979)     | 0.028    | 0.979 (0.692 - 1.387)               | 0.907    | 0.841 (0.705 - 1.003)     | 0.054    | 0.984 (0.694 - 1.395)               | 0.929    |
|               | Quintile 4                  | 0.733 (0.63 - 0.852)      | <0.001   | 0.753 (0.559 - 1.015)               | 0.062    | 0.737 (0.634 - 0.857)     | <0.001   | 0.776 (0.576 - 1.046)               | 0.096    |
|               | Quintile 5 (most deprived)  | 1                         | (0.001*) | 1                                   | (0.478*) | 1                         | (0.002*) | Reference population                | (0.592*) |
| Comorbidities | 0                           | 1                         | <0.001*  | 1                                   | <0.001*  | 1                         | <0.001*  | 1                                   | <0.001*  |
|               | 1                           | 1.045 (0.87 - 1.254)      | 0.64     | 1.394 (0.926 - 2.098)               | 0.112    | 1.024 (0.863 - 1.215)     | 0.788    | 1.459 (0.993 - 2.145)               | 0.055    |
|               | 2                           | 1.262 (1.049 - 1.52)      | 0.014    | 1.831 (1.242 - 2.701)               | 0.002    | 1.208 (1.099 - 1.445)     | 0.039    | 1.698 (1.166 - 2.471)               | 0.006    |
|               | 3                           | 1.824 (1.495 - 2.226)     | <0.001   | 2.551 (1.706 - 3.814)               | <0.001   | 2.118 (1.739 - 2.58)      | <0.001   | 2.719 (1.823 - 4.055)               | <0.001   |
|               | 4                           | 2.722 (2.157 - 3.435)     | <0.001   | 3.866 (2.479 - 6.031)               | <0.001   | 2.643 (2.055 - 3.399)     | <0.001   | 3.713 (2.362 - 5.838)               | <0.001   |
|               | 5                           | 3.892 (2.949 - 5.136)     | <0.001   | 6.247 (3.880 - 10.057)              | <0.001   | 3.641 (2.518 - 5.265)     | <0.001   | 6.203 (3.461 - 11.118)              | <0.001   |
|               | 6                           | 6.535 (4.202 - 10.162)    | <0.001   | 10.83 (5.527 - 21.219)              | <0.001   | 5.069 (1.615 - 15.909)    | 0.005    | 10.017 (2.395 - 41.898)             | 0.002    |
|               | 7                           | 3.085 (0.431 - 22.084)    | 0.262    | 8.972 (1.217 - 66.15)               | 0.031    |                           |          |                                     |          |
| eGFR (ml/min) | >120                        |                           |          |                                     |          | 2.02 (1.5 - 2.721)        | <0.001   | 1.466 (0.822 - 2.616)               | 0.195    |
|               | 90-120                      |                           |          |                                     |          | 1                         | <0.001*  | 1                                   | <0.001*  |
|               | 60-89                       |                           |          |                                     |          | 0.82 (0.699 - 0.962)      | 0.015    | 0.936 (0.704 - 1.245)               | 0.649    |
|               | 45-59                       |                           |          |                                     |          | 1.102 (0.917 - 1.324)     | 0.301    | 1.395 (1.014 - 1.918)               | 0.041    |
|               | 30-44                       |                           |          |                                     |          | 1.342 (1.084 - 1.662)     | 0.007    | 1.947 (1.367 - 2.775)               | <0.001   |
|               | 15-29                       |                           |          |                                     |          | 2.929 (2.267 - 3.784)     | <0.001   | 3.256 (2.095 - 5.059)               | <0.001   |

\* P-value for overall effect



Impact of CKD and comorbidity on mortality in a multi-ethnic population.

Jesky et al.

Supplementary Tables

**Supplementary Table II:** Cox Proportional Hazard Regression Analysis. Population specific IMD quintiles. Univariate (unadjusted) analyses

|              |                             | Complete Cohort (2a)      |         | ACR Tested Cohort (2b)    |          |
|--------------|-----------------------------|---------------------------|---------|---------------------------|----------|
|              |                             | Hazard Ratio              | P value | Hazard Ratio              | P value  |
|              |                             | (95% Confidence Interval) |         | (95% Confidence Interval) |          |
| HoB IMD Rank | Quintile 1 (least deprived) | 0.942 (0.798 - 1.111)     | 0.476   | 0.831 (0.6 - 1.152)       | 0.268    |
|              | Quintile 2                  | 0.947 (0.806 - 1.113)     | 0.507   | 0.943 (0.725 - 1.227)     | 0.664    |
|              | Quintile 3                  | 0.895 (0.761 - 1.054)     | 0.183   | 0.71 (0.537 - 0.938)      | 0.016    |
|              | Quintile 4                  | 0.923 (0.786 - 1.084)     | 0.33    | 0.908 (0.701 - 1.179)     | 0.465    |
|              | Quintile 5 (most deprived)  | 1                         | (0.75*) | 1                         | (0.154*) |

\* P-value for overall effect

For peer review only

Impact of CKD and comorbidity on mortality in a multi-ethnic population.  
 Jesky et al.  
 Supplementary Tables

**Supplementary Table III:** Cox Proportional Hazard Regression Analysis. Population specific IMD quintiles. Multivariate (adjusted) analyses

|               |                             | Model 1                                   |          |                                           |          | Model 2                                   |          |                                           |          | Model 3                                   |          |
|---------------|-----------------------------|-------------------------------------------|----------|-------------------------------------------|----------|-------------------------------------------|----------|-------------------------------------------|----------|-------------------------------------------|----------|
|               |                             | Complete Cohort                           |          | ACR Tested Cohort                         |          | Complete Cohort                           |          | ACR Tested Cohort                         |          | ACR Tested Cohort                         |          |
|               |                             | Hazard Ratio<br>(95% Confidence Interval) | P value  |
| Ethnicity     | White                       | 1                                         | <0.001*  | 1                                         | <0.001*  | 1                                         | <0.001*  | 1                                         | (0.001*) | 1                                         | <0.001*  |
|               | South Asian                 | 0.674 (0.596 - 0.762)                     | <0.001   | 0.753 (0.606 - 0.934)                     | 0.01     | 0.68 (0.601 - 0.769)                      | <0.001   | 0.788 (0.634 - 0.979)                     | 0.031    | 0.7 (0.562 - 0.871)                       | 0.001    |
|               | Black                       | 0.598 (0.510 - 0.701)                     | <0.001   | 0.529 (0.403 - 0.694)                     | <0.001   | 0.621 (0.528 - 0.729)                     | <0.001   | 0.579 (0.44 - 0.763)                      | <0.001   | 0.538 (0.408 - 0.71)                      | <0.001   |
| Age (years)   | 50 and under                | 1                                         | <0.001*  | 1                                         | <0.001*  | 1                                         | <0.001*  | 1                                         | <0.001*  | 1                                         | <0.001*  |
|               | 51-60                       | 1.957 (1.424 - 2.689)                     | <0.001   | 1.536 (0.918 - 2.569)                     | 0.102    | 2.09 (1.519 - 2.874)                      | <0.001   | 1.569 (0.936 - 2.628)                     | 0.087    | 1.516 (0.905 - 2.541)                     | 0.114    |
|               | 61-70                       | 4.526 (3.369 - 6.082)                     | <0.001   | 3.659 (2.268 - 5.906)                     | <0.001   | 4.945 (3.671 - 6.661)                     | <0.001   | 3.728 (2.297 - 6.051)                     | <0.001   | 3.543 (2.184 - 5.747)                     | <0.001   |
|               | 71-80                       | 10.113 (7.596 - 13.463)                   | <0.001   | 8.166 (5.147 - 12.955)                    | <0.001   | 10.951 (8.189 - 14.646)                   | <0.001   | 7.987 (4.984 - 12.8)                      | <0.001   | 7.42 (4.633 - 11.883)                     | <0.001   |
|               | 81-90                       | 24.007 (17.865 - 32.260)                  | <0.001   | 16.998 (10.429 - 27.704)                  | <0.001   | 25.291 (18.692 - 34.221)                  | <0.001   | 16.211 (9.819 - 26.762)                   | <0.001   | 15.724 (9.531 - 25.943)                   | <0.001   |
|               | >90                         | 68.995 (48.423 - 98.305)                  | <0.001   | 62.046 (33.832 - 113.786)                 | <0.001   | 68.684 (47.891 - 98.504)                  | <0.001   | 53.526 (28.861 - 99.272)                  | <0.001   | 52.376 (28.275 - 97.022)                  | <0.001   |
| Gender        | Female as reference         | 1.45 (1.302 - 1.615)                      | <0.001   | 1.809 (1.483 - 2.206)                     | <0.001   | 1.446 (1.298 - 1.611)                     | <0.001   | 1.82 (1.492 - 2.221)                      | <0.001   | 1.785 (1.462 - 2.179)                     | <0.001   |
| Smoker        | Non-smoker as reference     | 1.715 (1.488 - 1.975)                     | 0.001    | 1.987 (1.567 - 2.519)                     | <0.001   | 1.687 (1.464 - 1.945)                     | <0.001   | 1.961 (1.546 - 2.487)                     | <0.001   | 1.889 (1.488 - 2.397)                     | <0.001   |
| HoB IMD Rank  | Quintile 1 (least deprived) | 0.687 (0.578 - 0.817)                     | <0.001   | 0.705 (0.505 - 0.984)                     | 0.04     | 0.698 (0.587 - 0.829)                     | <0.001   | 0.741 (0.53 - 1.036)                      | 0.079    | 0.768 (0.549 - 1.074)                     | 0.123    |
|               | Quintile 2                  | 0.854 (0.725 - 1.005)                     | 0.057    | 0.891 (0.683 - 1.162)                     | 0.394    | 0.847 (0.719 - 0.996)                     | 0.045    | 0.893 (0.684 - 1.164)                     | 0.402    | 0.935 (0.716 - 1.22)                      | 0.619    |
|               | Quintile 3                  | 0.917 (0.779 - 1.079)                     | 0.295    | 0.735 (0.555 - 0.974)                     | 0.032    | 0.815 (0.778 - 1.078)                     | 0.289    | 0.754 (0.57 - 0.999)                      | 0.049    | 0.793 (0.598 - 1.051)                     | 0.107    |
|               | Quintile 4                  | 0.845 (0.719 - 0.992)                     | 0.04     | 0.797 (0.615 - 1.034)                     | 0.087    | 0.829 (0.706 - 0.974)                     | 0.023    | 0.804 (0.62 - 1.043)                      | 0.1      | 0.837 (0.645 - 1.086)                     | 0.18     |
|               | Quintile 5 (most deprived)  | 1                                         | (0.001*) | 1                                         | (0.127*) | 1                                         | (0.001*) | 1                                         | (0.22*)  | 1                                         | (0.362*) |
| Comorbidities | 0                           | 1                                         | <0.001*  | 1                                         | <0.001*  | 1                                         | <0.001*  | 1                                         | <0.001*  | 1                                         | <0.001*  |
|               | 1                           | 1.042 (0.868 - 1.251)                     | 0.66     | 1.397 (0.928 - 2.103)                     | 0.109    | 1.019 (0.859 - 1.21)                      | 0.828    | 1.461 (0.994 - 2.148)                     | 0.053    | 1.374 (0.935 - 2.021)                     | 0.106    |
|               | 2                           | 1.256 (1.043 - 1.512)                     | 0.016    | 1.829 (1.241 - 2.696)                     | 0.002    | 1.201 (1.004 - 1.437)                     | 0.045    | 1.69 (1.161 - 2.46)                       | 0.006    | 1.48 (1.016 - 2.157)                      | 0.041    |
|               | 3                           | 1.822 (1.493 - 2.224)                     | <0.001   | 2.544 (1.701 - 3.803)                     | <0.001   | 2.12 (1.74 - 2.582)                       | <0.001   | 2.708 (1.816 - 4.039)                     | <0.001   | 2.276 (1.521 - 3.408)                     | <0.001   |
|               | 4                           | 2.741 (2.172 - 3.459)                     | <0.001   | 3.911 (2.507 - 6.101)                     | <0.001   | 2.653 (2.063 - 3.411)                     | <0.001   | 3.779 (2.403 - 5.944)                     | <0.001   | 3.207 (2.037 - 5.051)                     | <0.001   |
|               | 5                           | 3.927 (2.976 - 5.18)                      | <0.001   | 6.363 (3.952 - 10.244)                    | <0.001   | 3.691 (2.553 - 5.336)                     | <0.001   | 6.488 (3.614 - 11.648)                    | <0.001   | 5.317 (2.962 - 9.548)                     | <0.001   |
|               | 6                           | 6.666 (4.287 - 10.366)                    | <0.001   | 11.583 (5.902 - 22.73)                    | <0.001   | 5.079 (1.618 - 15.946)                    | 0.005    | 9.982 (2.386 - 41.769)                    | 0.002    | 10.519 (2.513 - 44.026)                   | 0.001    |
|               | 7                           | 2.993 (0.418 - 21.429)                    | 0.275    | 8.507 (1.152 - 62.821)                    | 0.036    |                                           |          |                                           |          |                                           |          |
| eGFR (ml/min) | >120                        |                                           |          |                                           |          | 2.00 (1.485 - 2.693)                      | <0.001   | 1.458 (0.817 - 2.601)                     | 0.202    | 1.385 (0.775 - 2.473)                     | 0.271    |
|               | 90-120                      |                                           |          |                                           |          | 1                                         | <0.001*  | 1                                         | <0.001*  | 1                                         | <0.001*  |
|               | 60-89                       |                                           |          |                                           |          | 0.815 (0.694 - 0.957)                     | 0.012    | 0.934 (0.702 - 1.243)                     | 0.641    | 0.906 (0.681 - 1.206)                     | 0.498    |
|               | 45-59                       |                                           |          |                                           |          | 1.096 (0.912 - 1.316)                     | 0.33     | 1.397 (1.016 - 1.922)                     | 0.04     | 1.288 (0.936 - 1.772)                     | 0.12     |
|               | 30-44                       |                                           |          |                                           |          | 1.34 (1.082 - 1.659)                      | 0.007    | 1.925 (1.35 - 2.744)                      | <0.001   | 1.544 (1.079 - 2.21)                      | 0.018    |
|               | 15-29                       |                                           |          |                                           |          | 2.927 (2.266 - 3.781)                     | <0.001   | 3.281 (2.112 - 5.098)                     | <0.001   | 2.103 (1.335 - 3.314)                     | 0.001    |
| ACR (mg/mmol) | Optimal (<1.1)              |                                           |          |                                           |          |                                           |          |                                           |          | 1                                         | <0.001*  |
|               | High Normal (1.1-2.99)      |                                           |          |                                           |          |                                           |          |                                           |          | 1.041 (0.791 - 1.37)                      | 0.773    |
|               | High (3.0-29.99)            |                                           |          |                                           |          |                                           |          |                                           |          | 1.84 (1.466 - 2.309)                      | <0.001   |
|               | Very High (30 - 200)        |                                           |          |                                           |          |                                           |          |                                           |          | 2.982 (2.15 - 4.136)                      | <0.001   |
|               | Nephrotic (>200)            |                                           |          |                                           |          |                                           |          |                                           |          | 3.584 (1.967 - 6.528)                     | <0.001   |

\* P-value for overall effect

STROBE 2007 (v4) Statement—Checklist of items that should be included in reports of cohort studies

| Section/Topic             | Item # | Recommendation                                                                                                                                                                       | Reported on page # |
|---------------------------|--------|--------------------------------------------------------------------------------------------------------------------------------------------------------------------------------------|--------------------|
| Title and abstract        | 1      | (a) Indicate the study’s design with a commonly used term in the title or the abstract                                                                                               | 2                  |
|                           |        | (b) Provide in the abstract an informative and balanced summary of what was done and what was found                                                                                  | 2                  |
| <b>Introduction</b>       |        |                                                                                                                                                                                      |                    |
| Background/rationale      | 2      | Explain the scientific background and rationale for the investigation being reported                                                                                                 | 3                  |
| Objectives                | 3      | State specific objectives, including any prespecified hypotheses                                                                                                                     | 3                  |
| <b>Methods</b>            |        |                                                                                                                                                                                      |                    |
| Study design              | 4      | Present key elements of study design early in the paper                                                                                                                              | 3-6                |
| Setting                   | 5      | Describe the setting, locations, and relevant dates, including periods of recruitment, exposure, follow-up, and data collection                                                      | 5,6                |
| Participants              | 6      | (a) Give the eligibility criteria, and the sources and methods of selection of participants. Describe methods of follow-up                                                           | 4 (Figure 1)       |
|                           |        | (b) For matched studies, give matching criteria and number of exposed and unexposed                                                                                                  | n/a                |
| Variables                 | 7      | Clearly define all outcomes, exposures, predictors, potential confounders, and effect modifiers. Give diagnostic criteria, if applicable                                             | 5,6                |
| Data sources/ measurement | 8*     | For each variable of interest, give sources of data and details of methods of assessment (measurement). Describe comparability of assessment methods if there is more than one group | 3-5                |
| Bias                      | 9      | Describe any efforts to address potential sources of bias                                                                                                                            | 16-18              |
| Study size                | 10     | Explain how the study size was arrived at                                                                                                                                            | 4 (Figure 1)       |
| Quantitative variables    | 11     | Explain how quantitative variables were handled in the analyses. If applicable, describe which groupings were chosen and why                                                         | 5,6                |
| Statistical methods       | 12     | (a) Describe all statistical methods, including those used to control for confounding                                                                                                | 5,6                |
|                           |        | (b) Describe any methods used to examine subgroups and interactions                                                                                                                  | 6                  |
|                           |        | (c) Explain how missing data were addressed                                                                                                                                          | 6                  |
|                           |        | (d) If applicable, explain how loss to follow-up was addressed                                                                                                                       | 4 (Figure 1)       |
|                           |        | (e) Describe any sensitivity analyses                                                                                                                                                | n/a                |
| <b>Results</b>            |        |                                                                                                                                                                                      |                    |

|                          |     |                                                                                                                                                                                                              |                           |
|--------------------------|-----|--------------------------------------------------------------------------------------------------------------------------------------------------------------------------------------------------------------|---------------------------|
| Participants             | 13* | (a) Report numbers of individuals at each stage of study—eg numbers potentially eligible, examined for eligibility, confirmed eligible, included in the study, completing follow-up, and analysed            | 4 (Figure 1)              |
|                          |     | (b) Give reasons for non-participation at each stage                                                                                                                                                         | 4 (Figure 1)              |
|                          |     | (c) Consider use of a flow diagram                                                                                                                                                                           | 4 (Figure 1)              |
| Descriptive data         | 14* | (a) Give characteristics of study participants (eg demographic, clinical, social) and information on exposures and potential confounders                                                                     | 8 (Table 1), 10 (Table 2) |
|                          |     | (b) Indicate number of participants with missing data for each variable of interest                                                                                                                          | 8                         |
|                          |     | (c) Summarise follow-up time (eg, average and total amount)                                                                                                                                                  | 5                         |
| Outcome data             | 15* | Report numbers of outcome events or summary measures over time                                                                                                                                               | 8 (Table 1), 10 (Table 2) |
| Main results             | 16  | (a) Give unadjusted estimates and, if applicable, confounder-adjusted estimates and their precision (eg, 95% confidence interval). Make clear which confounders were adjusted for and why they were included | 11                        |
|                          |     | (b) Report category boundaries when continuous variables were categorized                                                                                                                                    | 11                        |
|                          |     | (c) If relevant, consider translating estimates of relative risk into absolute risk for a meaningful time period                                                                                             | n/a                       |
| Other analyses           | 17  | Report other analyses done—eg analyses of subgroups and interactions, and sensitivity analyses                                                                                                               | 12, 16                    |
| <b>Discussion</b>        |     |                                                                                                                                                                                                              |                           |
| Key results              | 18  | Summarise key results with reference to study objectives                                                                                                                                                     | 16-18                     |
| <b>Limitations</b>       |     |                                                                                                                                                                                                              |                           |
| Interpretation           | 20  | Give a cautious overall interpretation of results considering objectives, limitations, multiplicity of analyses, results from similar studies, and other relevant evidence                                   | 17-18                     |
| Generalisability         | 21  | Discuss the generalisability (external validity) of the study results                                                                                                                                        | 17-18                     |
| <b>Other information</b> |     |                                                                                                                                                                                                              |                           |
| Funding                  | 22  | Give the source of funding and the role of the funders for the present study and, if applicable, for the original study on which the present article is based                                                | 19                        |

\*Give information separately for cases and controls in case-control studies and, if applicable, for exposed and unexposed groups in cohort and cross-sectional studies.

**Note:** An Explanation and Elaboration article discusses each checklist item and gives methodological background and published examples of transparent reporting. The STROBE checklist is best used in conjunction with this article (freely available on the Web sites of PLoS Medicine at <http://www.plosmedicine.org/>, Annals of Internal Medicine at <http://www.annals.org/>, and Epidemiology at <http://www.epidem.com/>). Information on the STROBE Initiative is available at [www.strobe-statement.org](http://www.strobe-statement.org).

1  
2  
3  
4 Impact of CKD and comorbidity on mortality in a multi-ethnic population.  
5  
6

7 **The impact of chronic kidney disease and cardiovascular comorbidity on mortality in a multi-**  
8 **ethnic population: [a retrospective cohort study](#)**  
9

10  
11 **Mark Jesky<sup>1,2</sup>, Amanda Lambert<sup>3</sup>, AC Felix Burden<sup>4</sup>, Paul Cockwell<sup>1,2</sup>**

- 12 **1. Department of Renal Medicine, Queen Elizabeth Hospital Birmingham, UK**
- 13 **2. Division of Infection and Immunity, University of Birmingham, UK**
- 14 **3. Public Health Intelligence, Birmingham City Council, UK**
- 15 **4. Sandwell and West Birmingham Clinical Commissioning Group, UK**
- 16
- 17
- 18
- 19
- 20

21 **Corresponding Author**

22  
23 Dr. Mark Jesky  
24 Department of Renal Medicine,  
25 Queen Elizabeth Hospital Birmingham,  
26 Mindelsohn Way,  
27 Edgbaston,  
28 Birmingham,  
29 B15 2WB  
30 UK

31 Tel: 00 44 121 371 5852  
32 Fax: 00 44 121 371 5858  
33 Email: mark.jesky@uhb.nhs.uk  
34

35 **Key Words**

36 Chronic Kidney Disease, Comorbidity, Epidemiology, Ethnicity

37  
38 **Word Count (excluding title page, abstract, references, figures and tables)**

39  
40  
41 **3,690** words  
42  
43  
44  
45  
46  
47  
48  
49  
50  
51  
52  
53  
54  
55  
56  
57  
58  
59  
60

Impact of CKD and comorbidity on mortality in a multi-ethnic population.

## Abstract

**Objective:** To assess the impact of chronic kidney disease (CKD) and cardiovascular comorbidity on mortality in a multi-ethnic primary care population.

**Design:** Retrospective, ~~observational~~ cohort study.

**Setting:** Inner-city primary care trust in West Midlands, United Kingdom.

**Participants:** Individuals aged 40 years and older, of South Asian, black or white ethnicity, registered with a general practice and with their kidney function checked within the last 12 months (n=31,254).

**Outcome Measure:** All-cause mortality.

**Results:** Reduced estimated Glomerular Filtration Rate, higher albuminuria, older age, white ethnicity (versus South-Asian or black ethnicity) and increasing cardiovascular comorbidities were independent determinants of a higher mortality risk. In the multivariate model including comorbidities and kidney function, the hazard ratio for mortality for South Asians was 0.697 (95% confidence interval (CI) 0.56 – 0.868, p=0.001) and for blacks was 0.533 (95% CI 0.403 – 0.704, p<0.001) compared to whites.

**Conclusions:** The hazard ratio for death is lower for South Asian and black individuals compared to white individuals. This is, in part, independent of age, gender, socio-economic status, kidney function and comorbidities. Risk of death is higher in individuals with CKD and with a higher cumulative cardiovascular comorbidity.

## Article summary

- Article focus
  - Retrospective, primary care based cohort study
  - Investigating relationship between ethnicity and cardiovascular comorbidity
  - Inner city population with high deprivation
- Key messages
  - Renal function (both eGFR and ACR) conveys prognostic significance
  - Risk of death increases with a higher C-cumulative comorbidity score-can be used to risk stratify
  - Hazard ratio for death is lower for South Asian and black individuals compared to white individuals
- Strengths and limitations of this study
  - Sample size with inclusion of many practices
  - Ethnicity data self-reported and well recorded (>80%)
  - ~~Primary care based, looking at multiple cardiovascular comorbidities~~
  - Individuals of white ethnicity relatively underrepresented

1  
2  
3  
4  
5  
6  
7  
8  
9  
10  
11  
12  
13  
14  
15  
16  
17  
18  
19  
20  
21  
22  
23  
24  
25  
26  
27  
28  
29  
30  
31  
32  
33  
34  
35  
36  
37  
38  
39  
40  
41  
42  
43  
44  
45  
46  
47  
48  
49  
50  
51  
52  
53  
54  
55  
56  
57  
58  
59  
60

Impact of CKD and comorbidity on mortality in a multi-ethnic population.

|

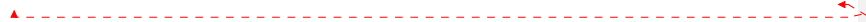

**Formatted:** Font: 10 pt, Bold  
**Formatted:** List Paragraph, Justified, Bulleted + Level: 2 + Aligned at: 0.75" + Indent at: 1", Tab stops: 3.13", Centered

For peer review only

1  
2  
3  
4 Impact of CKD and comorbidity on mortality in a multi-ethnic population.  
5  
6  
7  
8  
9  
10  
11  
12  
13  
14  
15  
16  
17  
18  
19  
20  
21  
22  
23  
24  
25  
26  
27  
28  
29  
30  
31  
32  
33  
34  
35  
36  
37  
38  
39  
40  
41  
42  
43  
44  
45  
46  
47  
48  
49  
50  
51  
52  
53  
54  
55  
56  
57  
58  
59  
60

For peer review only



Impact of CKD and comorbidity on mortality in a multi-ethnic population.

## Introduction

Chronic kidney disease (CKD) is a risk factor for increased mortality ~~[1],[1]~~ with an increased risk of death associated with both declining excretory renal function and albuminuria ~~[2-4],[2-4]~~ CKD prevalence and the risk imparted by CKD may vary by ethnicity; for example, some studies indicate that CKD is more common in people of white ethnicity [5 ,6] but non-white ethnic groups have a faster progression to end-stage kidney disease ~~[7-8],[7 ,8]~~ Paradoxically, when treated with chronic dialysis treatment, people of non-white ethnicity have a lower mortality risk than people of white ethnicity ~~[9-10],[9 ,10]~~ An increased risk of death is also associated with other comorbidities, including hypertension, diabetes and cardiovascular disease (CVD) ~~[11-16],[11-16]~~

Whilst previous studies have indicated survival differences between ethnic groups ~~[8-17-21],[8 ,17-21]~~ there has been limited reporting in these studies on the relative impact of comorbidities including kidney function on a population basis. This paucity of data reflects a shortfall in the availability of population based primary care databases linked to estimated Glomerular Filtration Rate (eGFR) and albuminuria reporting and traceable to mortality. Furthermore there is minimal comparative data on people of South Asian ethnicity; comparative studies usually report data on Chinese-Asians ~~[5],[5]~~

In the United Kingdom, there has been a systematic improvement in chronic disease recognition through a primary care pay for performance system, the Quality and Outcomes Framework (QOF) ~~[22-23],[22 ,23]~~ This system utilises chronic disease registers for the identification, monitoring and management of patients with known comorbidities; a component of this monitoring involves measuring and documenting renal function. ~~[T]~~ These disease registers can be combined with laboratory results and linked with demographic and mortality data to better identify determinants of outcomes.

We have therefore utilised chronic disease registers to perform a retrospective cohort study of the relationship between CKD, cardiovascular (CV) comorbidity and mortality within a deprived, inner-city multi-ethnic population. Our study hypotheses were

1. There are differences in mortality between different ethnic groups.
2. These differences in mortality are explained by known risk factors including comorbidities, renal function, demographic and socioeconomic factors.

This study incorporated all stages of kidney function except stage 5 CKD (except those with an eGFR below 15ml/min/1.73m<sup>2</sup> or receiving renal replacement therapy) in patients with known CV comorbidities and focused on three ethnic groups: South Asian (including individuals of Bangladeshi, Indian and Pakistani descent), black (individuals from or who have ancestors from Africa or the Caribbean) and white.

## Methods

Formatted: List Paragraph, Numbered + Level: 1 + Numbering Style: 1, 2, 3, ... + Start at: 1 + Alignment: Left + Aligned at: 0.25" + Indent at: 0.5"

Formatted: Font: 10 pt

Impact of CKD and comorbidity on mortality in a multi-ethnic population.

**Ethics:** The data was fully anonymised and was available as a component of an on-going clinical development programme. The responsible NHS R&D Consortium stated that this study did not require ethical submission to an NHS research ethics committee as it represented an evaluation of part of an on-going primary care trust (PCT) programme. For PCT data extraction the PCT professional executive committee and GP locality leads provided approval for the programme, including evaluation and publication.

**Cohort identification:** The cohort was derived from Heart of Birmingham (Teaching) Primary Care Trust (HoB PCT) which had a registered population of 312,070 (September 2008). The majority of the population (62%) were non-white [24]. Sixty nine percent of the population were below 40 years of age. Data were collected centrally, utilising software able to identify comorbidities through their classification on chronic disease registers [Enhanced Healthcare Services, Essex, UK]. Complete sets of anonymised data were available for 63 out of 73 general practices within HoB PCT comprising a population of 285,221 and these were extracted from electronic downloads. Figure 1 illustrates the selection process for inclusion in the study.

Figure 1. Flow Diagram indicating selection process for inclusion in the analyses

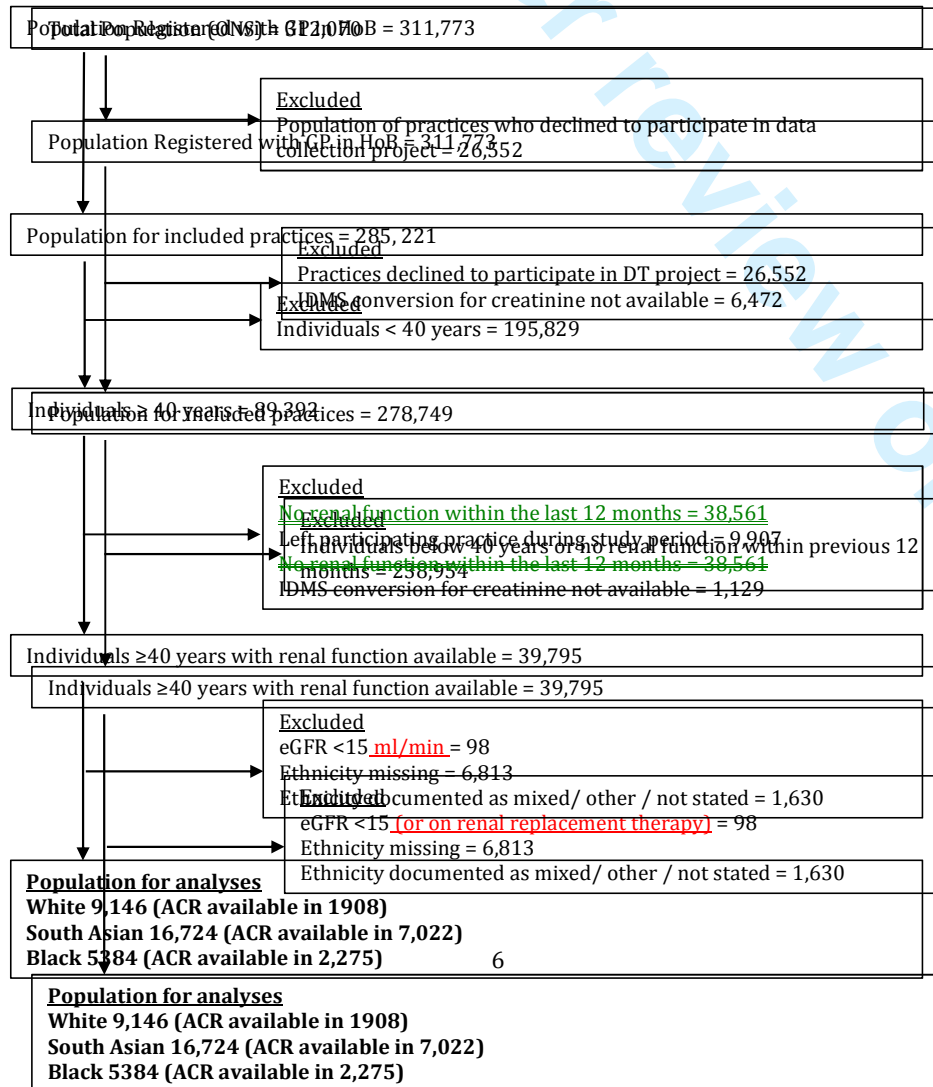

Impact of CKD and comorbidity on mortality in a multi-ethnic population.

The inclusion criteria comprised individuals aged 40 years and over whom had kidney function testing performed within the previous 12 months **as recommended by national guidelines**<sup>[25],[25]</sup>. Data for the following variables were collected: age, gender, ethnicity (~~self-reported~~), current smoking status, socio-economic status (SES), eGFR and/or creatinine, urinary albumin:creatinine ratio (ACR) and vascular comorbidity (atrial fibrillation, chronic kidney disease, diabetes mellitus, heart failure, hypertension, ischaemic heart disease and stroke) as defined by a relevant clinical (Read) code specified by the UK pay for performance (QOF) business rules ~~[26],[26]~~. **Ethnicity was self-reported, considered the 'gold standard' for classification**<sup>[27],[27]</sup>.

Formatted: Font: Bold

A standardised Isotope Dilution Mass Spectrometry (IDMS) **MDRD eGFR**<sup>[28]</sup> was reported from one of three local biochemistry laboratories, however eGFR reporting was not universally recorded on primary care systems in 2008 and if this was not available the eGFR was calculated by utilising laboratory provided correction factors for the creatinine to generate IDMS traceable **MDRD eGFR**. One general practice in the catchment area was excluded as IDMS traceable creatinine was not available from a fourth laboratory that provided blood tests specifically for that catchment area.

Formatted: Font: Bold

Formatted: Font: Bold

Socio-economic status (**SES**) was assessed using the Index of Multiple Deprivation (IMD 2007)<sup>[29]</sup>; <sup>[29]</sup> this utilises the postcode from an individual's address to identify the Lower Layer Super Output Area (LSOA) where the individual resides. Each of the 32,482 LSOAs in England are assigned a score and rank for the IMD 2007, with lower ranks corresponding to the most deprived areas. The Index of Multiple Deprivation has been validated as superior to traditional deprivation indexes such as the Townsend score ~~[30],[30]~~ due to its use of multiple domains reflective of socioeconomic deprivation ~~[31],[31]~~. The IMD 2007 score incorporates seven areas of deprivation: income deprivation; employment deprivation; health deprivation and disability; education; skills and training deprivation; barriers to housing and services; living environment deprivation; and crime. For the analyses presented, deprivation was divided into national quintiles, with the most deprived quintile as the reference population (i.e. how mortality in less deprived quintiles compared to the most deprived quintile).

Mortality data was obtained from the Primary Care Mortality Database ~~[32],[32]~~ a resource developed by The NHS Information Centre in partnership with the Office for National Statistics (ONS). Data obtained from ONS records is linked to the general practice where the individual was registered and therefore allows data to be extracted for specific general practices (i.e. those within HoB PCT). Individuals included in this analysis were either still registered with a HoB PCT GP at the end of the follow up period or had died whilst still registered at the practice. The follow up period was **23 months** from May 2008 until February 2011. **Individuals who had left the included practises during the follow up were excluded from this analysis (11.1%).**

### Statistical Analyses

All analyses were performed using PASW statistics 18 for Windows **[IBM, Chicago, IL, USA]**.

Impact of CKD and comorbidity on mortality in a multi-ethnic population.

Measurements for kidney function were divided into categories; eGFR into six categories (15-29, 30-44, 45-59, 60-89, 90-119 and  $\geq 120$  ml/min) with the eGFR range between 90 and 119 ml/min as the reference population. Individuals with an eGFR  $< 15$  ml/min were excluded from the analysis. ACR was divided into five categories ( $< 1.1$  mg/mmol 'optimal', 1.1-2.99 'high normal', 3-29.99 'high', 30-199.99 'very high' and  $\geq 200$  'nephrotic') in line with the KDIGO consensus conference [33], [33]

The relationship between age and mortality was not linear. Therefore, age was divided into six categories (50 years and under, 51-60, 61-70, 71-80, 81-90, greater than 90 years) with the youngest group serving as comparator.

Descriptive statistics are presented as mean with standard deviation or median with interquartile range depending on distribution. Continuous variables were compared using ANOVA (normal distribution) with post-hoc Bonferroni analysis or Kruskal-Wallis (non-parametric distribution) tests. Chi-squared tests were used to compare categorical variables.

Cox regression survival analysis was used to evaluate the association of ethnicity and mortality, both before and after adjusting for covariates. Data are presented using survival plots, hazard ratios (HRs) with 95% confidence intervals (95% CI) and p-values. Both univariate (unadjusted) and multivariate (adjusted) regression analyses are presented. The proportionality hazard assumption, assessed using  $\log(-\log(\text{survival function}))$  plots, was met for all covariates.

The association between comorbidity, ethnicity and mortality was assessed by univariate analyses for all risk factors and then presented as three models. Choice of model variables were determined by the availability in the dataset of inclusion demographic and clinical of 'classical' risk factors combined with those consistent with those derived from utilised by other investigators in previous work in similar populations [34-35], [34, 35] where the variable was available in our target population. Model 1 incorporates the number of identified vascular comorbidities (zero to seven), ethnicity, age, gender, smoking status and SES. Model 2 includes eGFR level with removal of CKD from the comorbidity score (possible scores therefore zero to six) in order to avoid the association between declining renal function and the likelihood of being on the CKD register. Model 3 added ACR to the variables in Model 2.

A complete case model was used in the analyses. All data were complete with the exception of ACR. Therefore data were analysed for all individuals identified (unadjusted, Model 1 and Model 2) and then repeated for individuals who had an ACR recorded (unadjusted and Models 1-3). An 'enter' technique was used for the regression analysis.

## Results

### Complete Cohort

At inception (May 2008) 31,254 individuals fulfilled inclusion criteria for analysis. People of South Asian ethnicity formed the largest ethnic group (16,724, 53.4%), followed by people of white ethnicity (9146, 29.3%) and black ethnicity (5384, 17.2%). Baseline characteristics of the study population are shown in

1  
2  
3  
4  
5  
6  
7  
8  
9  
10  
11  
12  
13  
14  
15  
16  
17  
18  
19  
20  
21  
22  
23  
24  
25  
26  
27  
28  
29  
30  
31  
32  
33  
34  
35  
36  
37  
38  
39  
40  
41  
42  
43  
44  
45  
46  
47  
48  
49  
50  
51  
52  
53  
54  
55  
56  
57  
58  
59  
60

Impact of CKD and comorbidity on mortality in a multi-ethnic population.

**Table 1.** The age distribution differed between groups with South Asians significantly younger than the other two ethnic groups. There was no significant difference in gender between the three ethnic groups. Smoking was least common in the South Asian group. The majority of all three ethnic groups resided in the most deprived quintile, with a higher proportion of people of South Asian and black ethnicity in this quintile than people of white ethnicity.

For peer review only

Impact of CKD and comorbidity on mortality in a multi-ethnic population.

Table 1: Baseline characteristics by ethnicity. Complete Cohort.

|                            |                                        | All               | White             | South Asian       | Black              | p-value |
|----------------------------|----------------------------------------|-------------------|-------------------|-------------------|--------------------|---------|
| <b>Number</b>              | <b>n (%)</b>                           | 31254 (100)       | 9146 (29.3)       | 16724 (53.4)      | 5384 (17.2)        |         |
| <b>Age</b>                 | <b>median (lower, upper quartile)</b>  | 59.0 (50.0,71.0)  | 65.0 (55.0, 75.0) | 56.0 (49.0, 68.0) | 61.0 (48.0, 73.0)  | <0.001  |
|                            | <b>50 and under (%)</b>                | 8421 (26.9)       | 1515 (16.6)       | 5124 (30.6)       | 1782 (33.1)        | <0.001  |
|                            | <b>51-60 (%)</b>                       | 8017 (25.7)       | 1948 (21.3)       | 5170 (30.9)       | 899 (16.7)         |         |
|                            | <b>61-70 (%)</b>                       | 6650 (21.3)       | 2459 (26.9)       | 3206 (19.2)       | 985 (18.3)         |         |
|                            | <b>71-80 (%)</b>                       | 6006 (19.2)       | 2109 (23.1)       | 2568 (15.4)       | 1329 (24.7)        |         |
|                            | <b>81-90 (%)</b>                       | 1974 (6.3)        | 1008 (11.0)       | 604 (3.6)         | 362 (6.7)          |         |
|                            | <b>&gt;90 (%)</b>                      | 186 (0.6)         | 107 (1.2)         | 52 (0.3)          | 27 (0.5)           |         |
| <b>Gender</b>              | <b>female (%)</b>                      | 15248 (48.8)      | 4384 (47.9)       | 8184 (48.9)       | 2680 (49.8)        | 0.085   |
| <b>Smoking</b>             | <b>n (%)</b>                           | 5150 (16.5)       | 2285 (25.0)       | 1812 (10.8)       | 1053 (19.6)        | <0.001  |
| <b>IMD Rank</b>            | <b>Quintile 1 (least deprived) (%)</b> | 152 (0.5)         | 59 (0.6)          | 92 (0.6)          | 1 (0.0)            | <0.001  |
|                            | <b>Quintile 2 (%)</b>                  | 316 (1.0)         | 132 (1.4)         | 173 (1.0)         | 11 (0.2)           |         |
|                            | <b>Quintile 3(%)</b>                   | 3348 (10.7)       | 1860 (20.3)       | 1255 (7.5)        | 233 (4.3)          |         |
|                            | <b>Quintile 4 (%)</b>                  | 5144 (16.5)       | 2243 (24.5)       | 2238 (13.4)       | 663 (12.3)         |         |
|                            | <b>Quintile 5 (most deprived) (%)</b>  | 22294 (71.3)      | 4852 (53.1)       | 12966 (77.5)      | 4476 (83.1)        |         |
| <b>AF</b>                  | <b>n (%)</b>                           | 807 (2.6)         | 515 (5.6)         | 212 (1.3)         | 80 (1.5)           | <0.001  |
| <b>CKD</b>                 | <b>n (%)</b>                           | 3648 (11.7)       | 1318 (14.4)       | 1691 (10.1)       | 639 (11.9)         | <0.001  |
| <b>Diabetes</b>            | <b>n (%)</b>                           | 9931 (31.8)       | 1771 (19.4)       | 6415 (38.4)       | 1745 (32.4)        | <0.001  |
| <b>Heart Failure</b>       | <b>n (%)</b>                           | 822 (2.6)         | 308 (3.4)         | 385 (2.3)         | 129 (2.4)          | <0.001  |
| <b>Hypertension</b>        | <b>n (%)</b>                           | 16505 (52.8)      | 5181 (56.6)       | 8063 (48.2)       | 3261 (60.6)        | <0.001  |
| <b>IHD</b>                 | <b>n (%)</b>                           | 4226 (13.5)       | 1417 (15.5)       | 2386 (14.3)       | 423 (7.9)          | <0.001  |
| <b>Stroke</b>              | <b>n (%)</b>                           | 1476 (4.7)        | 570 (6.2)         | 673 (4.0)         | 233 (4.4)          | <0.001  |
| <b>Comorbidities</b>       | <b>median (lower, upper quartile)</b>  | 1.0 (0.0, 2.0)    | 1.0 (0.0, 2.0)    | 1.0 (0.0, 2.0)    | 1.0 (0.0, 2.0)     | 0.075   |
|                            | <b>0 (%)</b>                           | 9879 (31.6)       | 2829 (30.9)       | 5459 (32.6)       | 1591 (29.6)        | <0.001  |
|                            | <b>1 (%)</b>                           | 10707 (34.3)      | 3253 (35.6)       | 5524 (33)         | 1930 (35.8)        |         |
|                            | <b>2 (%)</b>                           | 6845 (21.9)       | 1898 (20.8)       | 3694 (22.1)       | 1253 (23.3)        |         |
|                            | <b>3 (%)</b>                           | 2667 (8.5)        | 785 (8.6)         | 1451 (8.7)        | 431 (8)            |         |
|                            | <b>4 (%)</b>                           | 828 (2.6)         | 254 (2.8)         | 447 (2.7)         | 127 (2.4)          |         |
|                            | <b>5 (%)</b>                           | 268 (0.9)         | 103 (1.1)         | 124 (0.7)         | 41 (0.8)           |         |
|                            | <b>6 (%)</b>                           | 55 (0.2)          | 23 (0.3)          | 23 (0.1)          | 9 (0.2)            |         |
|                            | <b>7 (%)</b>                           | 5 (<0.1)          | 1 (<0.1)          | 2 (<0.1)          | 2 (<0.1)           |         |
| <b>Creatinine (umol/L)</b> | <b>mean (SD)</b>                       | 87.0 (25.8)       | 88.2 (24.7)       | 84.6 (25.4)       | 92.3 (28)          | <0.001  |
| <b>eGFR (ml/min)</b>       | <b>median (lower, upper quartile)</b>  | 80.2 (66.7, 94.3) | 74.9 (62.3, 88.8) | 81.3 (68.1, 95.3) | 85.5 (72.3, 100.1) | <0.001  |
|                            | <b>&gt;120 (%)</b>                     | 1473 (4.7)        | 264 (2.9)         | 802 (4.8)         | 407 (7.6)          | <0.001  |
|                            | <b>90-120 (%)</b>                      | 8523 (27.3)       | 1842 (20.1)       | 4841 (28.9)       | 1840 (34.2)        |         |
|                            | <b>60-89 (%)</b>                       | 16373 (52.4)      | 5077 (55.5)       | 8776 (52.5)       | 2520 (46.8)        |         |
|                            | <b>45-59 (%)</b>                       | 3447 (11.0)       | 1389 (15.2)       | 1627 (9.7)        | 431 (8.0)          |         |
|                            | <b>30-44 (%)</b>                       | 1134 (3.6)        | 466 (5.1)         | 517 (3.1)         | 151 (2.8)          |         |
|                            | <b>15-29 (%)</b>                       | 304 (1.0)         | 108 (1.2)         | 161 (1.0)         | 35 (0.7)           |         |
| <b>Died</b>                | <b>n (%)</b>                           | 1435 (4.6)        | 681 (7.4)         | 541 (3.2)         | 213 (4.0)          | <0.001  |

Formatted Table

Impact of CKD and comorbidity on mortality in a multi-ethnic population.

The number of vascular comorbidities was similar between groups, with 11-13% of each ethnic group having three or more comorbidities. The prevalence of different vascular comorbidities varied between groups: the white group had a lower reported prevalence of diabetes but a higher prevalence of CKD, atrial fibrillation, heart failure and stroke.

Median eGFR (corrected for ethnicity as appropriate) was 80.2 ml/min and was lowest in the white group (74.9 ml/min compared to 81.3 ml/min for South Asian individuals and 85.5 ml/min for those of black ethnicity;  $p<0.001$ ). 21.5% of White, 13.8% of South Asian and 11.5% of Black individuals had an eGFR between 15 and 59 ml/min consistent with stage 3-4 CKD.

At the end of the study period a higher proportion of white individuals had died (7.4%) compared to the two other ethnic groups (South Asian 3.2%, Black 4.0%;  $p<0.001$ ).

#### Albumin Creatinine Ratio Cohort

An ACR had been tested in 7022 (42.0%), 2275 (24.9%) and 1908 (20.9%) of South Asian, black and white individuals respectively. **Table 2** lists the baseline characteristics for this subgroup. The median ACR was 1.1 mg/mmol and was highest in the South Asian group (1.2 mg/mmol compared to 1.0 mg/mmol for both white and black individuals;  $p<0.001$ ). There were similar trends to the whole cohort for age distribution, eGFR, smoking status, and deprivation.

Those with an ACR tested were more likely to have a greater vascular comorbid burden (18-20% having three or more comorbidities). A higher proportion of individuals of South Asian descent, male gender and with diabetes had their ACR tested.

In concordance to the whole group analyses, deaths in the ACR cohort were highest amongst white individuals (7.8%) compared to the South Asian (3.6%) and black individuals (3.7%) ( $p<0.001$ ).

#### Univariate Analysis

The univariate (unadjusted) analysis for the complete cohort (**Table 3a**) demonstrated unadjusted HRs for death of 0.421 (95% CI 0.376 – 0.471,  $p<0.001$ ) for people of South Asian ethnicity and 0.522 (95% CI 0.447 – 0.609,  $p<0.001$ ) for people of black ethnicity compared to people of white ethnicity. The mortality rate increased exponentially with age and a higher HR was observed for male gender, current smokers and total number of comorbidities. No difference in mortality was found between deprivation quintiles. Using an eGFR of 90-119 ml/min as reference, a J-shaped relationship was observed with a higher risk of death seen for both higher and lower eGFR values. The HR for death increased progressively by stage of CKD with an eGFR  $<90$  ml/min.

The univariate analysis was repeated for those individuals who had their ACR reported (**Table 3b**) with similar trends identified to the whole population analysis with the exception of no observed difference between individuals with an eGFR of  $\geq 120$  ml/min compared to 90-119 ml/min. A progressive increase in HR for death was seen with each increasing category for ACR.

Impact of CKD and comorbidity on mortality in a multi-ethnic population.

Table 2: Baseline characteristics by ethnicity. ACR tested cohort.

|                                                      |                                        | All               | White             | South Asian       | Black             | p-value |
|------------------------------------------------------|----------------------------------------|-------------------|-------------------|-------------------|-------------------|---------|
| <b>Number</b>                                        | <b>n (%)</b>                           | 11205 (100)       | 1908 (17)         | 7022 (62.7)       | 2275 (20.3)       |         |
| <b>Age (years)</b>                                   | <b>median (lower, upper quartile)</b>  | 59.0 (50.0, 71.0) | 65.0 (55.0, 75.0) | 57.0 (50.0, 68.0) | 65.0 (49.0, 74.0) | <0.001  |
|                                                      | <b>50 and under (%)</b>                | 1900 (25.9)       | 304 (15.9)        | 1961 (27.9)       | 635 (27.9)        | <0.001  |
|                                                      | <b>51-60 (%)</b>                       | 3024 (27.0)       | 413 (21.6)        | 2239 (31.9)       | 372 (16.4)        |         |
|                                                      | <b>61-70 (%)</b>                       | 2370 (21.2)       | 496 (26.0)        | 1423 (20.3)       | 451 (19.8)        |         |
|                                                      | <b>71-80 (%)</b>                       | 2251 (20.1)       | 456 (23.9)        | 1152 (16.2)       | 643 (28.3)        |         |
|                                                      | <b>81-90 (%)</b>                       | 611 (5.5)         | 222 (11.6)        | 226 (3.2)         | 163 (7.2)         |         |
|                                                      | <b>&gt;90 (%)</b>                      | 49 (0.4)          | 17 (0.9)          | 21 (0.3)          | 11 (0.5)          |         |
| <b>Gender</b>                                        | <b>female (%)</b>                      | 4348 (38.8)       | 682 (35.7)        | 2754 (39.2)       | 912 (40.1)        | 0.008   |
| <b>Smoking</b>                                       | <b>n (%)</b>                           | 1869 (16.7)       | 518 (27.1)        | 872 (12.4)        | 479 (21.1)        | <0.001  |
| <b>IMD Rank</b>                                      | <b>Quintile 1 (least deprived) (%)</b> | 30 (0.3)          | 4 (0.2)           | 25 (0.4)          | 1 (0.0)           | <0.001  |
|                                                      | <b>Quintile 2 (%)</b>                  | 84 (0.7)          | 19 (1.0)          | 60 (0.9)          | 5 (0.2)           |         |
|                                                      | <b>Quintile 3 (%)</b>                  | 712 (6.4)         | 233 (12.2)        | 540 (5.7)         | 78 (3.4)          |         |
|                                                      | <b>Quintile 4 (%)</b>                  | 1458 (13.0)       | 339 (17.8)        | 876 (12.5)        | 243 (10.7)        |         |
|                                                      | <b>Quintile 5 (most deprived) (%)</b>  | 8921 (79.6)       | 1313 (68.8)       | 5660 (80.6)       | 1948 (85.6)       |         |
| <b>AF</b>                                            | <b>n (%)</b>                           | 233 (2.1)         | 113 (5.9)         | 91 (1.3)          | 29 (1.3)          | <0.001  |
| <b>CKD</b>                                           | <b>n (%)</b>                           | 1637 (14.6)       | 356 (18.7)        | 921 (13.1)        | 360 (15.8)        | <0.001  |
| <b>Diabetes</b>                                      | <b>n (%)</b>                           | 6828 (60.9)       | 990 (51.9)        | 4505 (62.4)       | 1333 (58.6)       | <0.001  |
| <b>Heart Failure</b>                                 | <b>n (%)</b>                           | 310 (2.8)         | 74 (3.9)          | 175 (2.5)         | 61 (2.7)          | 0.005   |
| <b>Hypertension</b>                                  | <b>n (%)</b>                           | 6189 (55.2)       | 1092 (57.2)       | 3679 (52.4)       | 1418 (62.3)       | <0.001  |
| <b>IHD</b>                                           | <b>n (%)</b>                           | 1556 (13.9)       | 281 (14.7)        | 1071 (15.3)       | 201 (8.8)         | <0.001  |
| <b>Stroke</b>                                        | <b>n (%)</b>                           | 480 (4.3)         | 97 (5.1)          | 283 (4.0)         | 100 (4.4)         | 0.126   |
| <b>Comorbidities</b>                                 | <b>median (lower, upper quartile)</b>  | 1.0 (1.0, 2.0)    | 2.0 (1.0, 2.0)    | 1.0 (1.0, 2.0)    | 2.0 (1.0, 2.0)    | 0.818   |
|                                                      | <b>0 (%)</b>                           | 2510 (22.4)       | 472 (24.7)        | 1514 (21.6)       | 524 (23.0)        | <0.001  |
|                                                      | <b>1 (%)</b>                           | 3139 (28.0)       | 466 (24.4)        | 2103 (29.9)       | 870 (25.1)        |         |
|                                                      | <b>2 (%)</b>                           | 3438 (30.7)       | 574 (30.1)        | 2093 (29.8)       | 771 (33.9)        |         |
|                                                      | <b>3 (%)</b>                           | 1481 (13.2)       | 261 (13.7)        | 928 (13.2)        | 292 (12.8)        |         |
|                                                      | <b>4 (%)</b>                           | 448 (4.0)         | 79 (4.1)          | 284 (4.0)         | 85 (3.7)          |         |
|                                                      | <b>5 (%)</b>                           | 154 (1.4)         | 46 (2.4)          | 83 (1.2)          | 25 (1.1)          |         |
|                                                      | <b>6 (%)</b>                           | 32 (0.3)          | 10 (0.5)          | 15 (0.2)          | 7 (0.3)           |         |
|                                                      | <b>7 (%)</b>                           | 3 (<0.1)          | 0 (<0.1)          | 2 (<0.1)          | 1 (<0.1)          |         |
| <b>Creatinine<br/>(<math>\mu\text{mol/L}</math>)</b> | <b>mean (SD)</b>                       | 89.1 (27.6)       | 91.8 (26.2)       | 86.2 (26.8)       | 95.8 (29.6)       |         |
| <b>eGFR (ml/min)</b>                                 | <b>median (lower, upper quartile)</b>  | 81.1 (66.3, 95.9) | 74.3 (59.7, 89.8) | 82 (67.4, 89.8)   | 84.2 (70.0, 98.9) |         |
|                                                      | <b>&gt;120 (%)</b>                     | 611 (5.5)         | 67 (3.5)          | 380 (5.4)         | 164 (7.2)         | <0.001  |
|                                                      | <b>90-120 (%)</b>                      | 3234 (28.9)       | 404 (21.2)        | 2091 (29.8)       | 739 (32.5)        |         |
|                                                      | <b>60-89 (%)</b>                       | 5451 (48.6)       | 953 (49.9)        | 3453 (49.2)       | 1045 (45.9)       |         |
|                                                      | <b>45-59 (%)</b>                       | 1300 (11.6)       | 323 (16.9)        | 750 (10.7)        | 227 (10.0)        |         |
|                                                      | <b>30-44 (%)</b>                       | 487 (4.3)         | 131 (6.9)         | 274 (3.9)         | 82 (3.6)          |         |
|                                                      | <b>15-29 (%)</b>                       | 122 (1.1)         | 30 (1.6)          | 74 (1.1)          | 18 (0.8)          |         |
| <b>ACR (mg/mmol)</b>                                 | <b>median (lower, upper quartile)</b>  | 1.1 (0.4, 3.4)    | 1.0 (1.4, 2.8)    | 1.2 (0.5, 3.8)    | 1.0 (0.3, 2.9)    | <0.001  |
|                                                      | <b>Optimal (&lt;1.1) (%)</b>           | 5641 (50.3)       | 1026 (53.8)       | 3400 (48.4)       | 1214 (53.4)       | <0.001  |
|                                                      | <b>High Normal (1.1-2.99) (%)</b>      | 2485 (22.2)       | 426 (22.3)        | 1560 (22.2)       | 499 (21.9)        |         |
|                                                      | <b>High (3.0-29.99) (%)</b>            | 2594 (23.2)       | 402 (21.1)        | 1717 (24.4)       | 475 (20.9)        |         |
|                                                      | <b>Very High (30 - 200) (%)</b>        | 413 (3.7)         | 49 (2.6)          | 287 (4.1)         | 77 (3.4)          |         |
|                                                      | <b>Nephrotic (&gt;200) (%)</b>         | 73 (0.7)          | 5 (0.3)           | 58 (0.8)          | 10 (0.4)          |         |
| <b>Died</b>                                          | <b>n (%)</b>                           | 484 (4.3)         | 149 (7.8)         | 250 (3.6)         | 85 (3.7)          | <0.001  |



Impact of CKD and comorbidity on mortality in a multi-ethnic population.

Table 3: Cox Proportional Hazard Regression Analysis. Univariate (unadjusted) analyses

|               |                             | Complete Cohort (3a)                      |          | ACR Tested Cohort (3b)                    |         |
|---------------|-----------------------------|-------------------------------------------|----------|-------------------------------------------|---------|
|               |                             | Hazard Ratio<br>(95% Confidence Interval) | P value  | Hazard Ratio<br>(95% Confidence Interval) | P value |
| Ethnicity     | White                       | Reference-population <sub>1</sub>         | <0.001*  | Reference-Population <sub>1</sub>         | <0.001* |
|               | South Asian                 | 0.421 (0.376 - 0.471)                     | <0.001   | 0.444 (0.362 - 0.545)                     | <0.001  |
|               | Black                       | 0.522 (0.447 - 0.609)                     | <0.001   | 0.467 (0.357 - 0.611)                     | <0.001  |
| Age (years)   | 50 and under                | Reference-population <sub>1</sub>         | <0.001*  | Reference-Population <sub>1</sub>         | <0.001* |
|               | 51-60                       | 2.127 (1.553 - 2.914)                     | <0.001   | 1.757 (1.057 - 2.921)                     | 0.03    |
|               | 61-70                       | 5.429 (4.078 - 7.228)                     | <0.001   | 4.646 (2.926 - 7.345)                     | <0.001  |
|               | 71-80                       | 12.971 (9.887 - 17.016)                   | <0.001   | 11.363 (7.376 - 17.505)                   | <0.001  |
|               | 81-90                       | 32.86 (29.952 - 43.275)                   | <0.001   | 24.725 (15.769 - 38.767)                  | <0.001  |
|               | >90                         | 90.904 (65.097 - 126.943)                 | <0.001   | 82.731 (46.684 - 146.612)                 | <0.001  |
| Gender        | Female as reference         | 1.375 (1.238 - 1.529)                     | <0.001   | 1.401 (1.155 - 1.699)                     | 0.001   |
| Smoker        | Non-smoker as reference     | 1.154 (1.009 - 1.317)                     | 0.036    | 1.259 (1.006 - 1.574)                     | 0.044   |
| IMD Rank      | Quintile 1 (least deprived) | 0.860 (0.385 - 1.919)                     | 0.713    | <0.001 (<0.001 - >10 <sup>4</sup> 5)      | 0.939   |
|               | Quintile 2                  | 0.822 (0.465 - 1.453)                     | 0.501    | <0.001 (<0.001 - >10 <sup>4</sup> 5)      | 0.897   |
|               | Quintile 3                  | 1.002 (0.846 - 1.186)                     | 0.983    | 1.151 (0.818 - 1.619)                     | 0.419   |
|               | Quintile 4                  | 0.925 (0.800 - 1.070)                     | 0.297    | 0.774 (0.577 - 1.039)                     | 0.088   |
|               | Quintile 5 (most deprived)  | Reference-population <sub>1</sub>         | (0.802*) | Reference-Population <sub>1</sub>         | (0.42*) |
| AF            |                             | 5.588 (4.757 - 6.565)                     | <0.001   | 6.123 (4.568 - 8.207)                     | <0.001  |
| CKD           |                             | 3.442 (3.074 - 3.854)                     | <0.001   | 3.498 (2.904 - 4.213)                     | <0.001  |
| Diabetes      |                             | 1.346 (1.209 - 1.498)                     | <0.001   | 1.939 (1.577 - 2.385)                     | <0.001  |
| Heart Failure |                             | 7.622 (6.595 - 8.804)                     | <0.001   | 7.279 (5.681 - 9.327)                     | <0.001  |
| Hypertension  |                             | 2.079 (1.857 - 2.325)                     | <0.001   | 2.05 (1.681 - 2.499)                      | <0.001  |
| IHD           |                             | 2.796 (2.495 - 3.132)                     | <0.001   | 3.136 (2.592 - 3.795)                     | <0.001  |
| Stroke        |                             | 3.654 (3.154 - 4.233)                     | <0.001   | 3.709 (2.855 - 4.817)                     | <0.001  |
| Comorbidities | 0                           | Reference-population <sub>1</sub>         | <0.001*  | Reference-population <sub>1</sub>         | <0.001* |
|               | 1                           | 1.775 (1.487 - 2.118)                     | <0.001   | 1.630 (1.094 - 2.430)                     | 0.016   |
|               | 2                           | 2.930 (2.458 - 3.493)                     | <0.001   | 2.917 (2.023 - 4.205)                     | <0.001  |
|               | 3                           | 5.486 (4.550 - 6.615)                     | <0.001   | 5.580 (3.837 - 8.113)                     | <0.001  |
|               | 4                           | 9.584 (7.691 - 11.942)                    | <0.001   | 9.855 (6.511 - 14.917)                    | <0.001  |
|               | 5                           | 17.591 (13.490 - 22.939)                  | <0.001   | 21.091 (13.479 - 33.001)                  | <0.001  |
|               | 6                           | 28.391 (18.411 - 43.782)                  | <0.001   | 33.673 (17.519 - 64.722)                  | <0.001  |
|               | 7                           | 11.873 (1.664 - 84.728)                   | 0.014    | 29.402 (4.031 - 214.462)                  | 0.001   |
| eGFR (ml/min) | >120                        | 1.492 (1.110 - 2.007)                     | 0.008    | 1.072 (0.603 - 1.903)                     | 0.813   |
|               | 90-120                      | Reference-population <sub>1</sub>         | <0.001*  | Reference-Population <sub>1</sub>         | <0.001* |
|               | 60-89                       | 1.360 (1.162 - 1.591)                     | <0.001   | 1.504 (1.138 - 1.987)                     | 0.04    |
|               | 45-59                       | 3.849 (3.239 - 4.573)                     | <0.001   | 4.255 (3.155 - 5.737)                     | <0.001  |
|               | 30-44                       | 6.590 (5.401 - 8.041)                     | <0.001   | 7.715 (5.564 - 10.699)                    | <0.001  |
|               | 15-29                       | 14.465 (11.341 - 18.450)                  | <0.001   | 15.054 (9.942 - 22.796)                   | <0.001  |
| ACR (mg/mmol) | Optimal (<1.1)              |                                           |          | Reference-Population <sub>1</sub>         | <0.001* |
|               | High Normal (1.1-2.99)      |                                           |          | 1.363 (1.038 - 1.788)                     | 0.026   |
|               | High (3.0-29.99)            |                                           |          | 2.967 (2.381 - 3.697)                     | <0.001  |
|               | Very High (30 - 200)        |                                           |          | 6.253 (4.493 - 14.005)                    | <0.001  |
|               | Nephrotic (>200)            |                                           |          | 7.932 (4.493 - 14.005)                    | <0.001  |

\* P-value for overall effect

1  
2  
3  
4 Impact of CKD and comorbidity on mortality in a multi-ethnic population.  
5  
6

### 7 **Multivariate Analysis**

8 Following adjustment for covariates the differences in ethnicity remained; people of South Asian and  
9 black ethnicities had a lower HR for death in all analyses.  
10

11 Model 1 (complete cohort, incorporating the number of identified comorbidities, see **Supplementary**  
12 **Table I**) analysed the complete cohort and showed an adjusted HR for death of 0.673 (95% CI 0.595 –  
13 0.761, p<0.001) for people of South Asian ethnicity and 0.592 (95% CI 0.504 – 0.696, p<0.001) for people  
14 of black ethnicity compared to people of white ethnicity. When the analysis was restricted to the cohort  
15 with ACR tests available the HR for death was 0.757 (95% CI 0.61 – 0.939, p=0.011) for people of South  
16 Asian ethnicity and 0.526 for people of black ethnicity (95% CI 0.4 – 0.692, p<0.001) compared to people  
17 of white ethnicity. For the complete cohort, mortality risk was lower in IMD quintiles 3 and 4 (compared  
18 to the most deprived quintile 5). No significant difference between IMD quintiles was identified in the  
19 ACR cohort. Increasing age (51 and over in complete cohort, 61 and over in ACR cohort), smoking status  
20 and male gender was significant in analyses for both cohorts. An increased HR for death was observed for  
21 two or more comorbidities, with the HR increasing as the number of comorbidities increased.  
22  
23

24  
25 Kidney function (eGFR) was incorporated into Model 2 (with the removal of CKD from the comorbidity  
26 score, see **Supplementary Table I**) and in the complete cohort the HR for people of South-Asian ethnicity  
27 was 0.678 (95% CI 0.6 – 0.767 p<0.001) and for people of black ethnicity was 0.789 (95% CI 0.635 – 0.98,  
28 p=0.032) compared to people of white ethnicity. Similarly, when the analysis was restricted to the cohort  
29 of patients with ACR tests available people of South Asian and Black ethnicity had a lower proportion of  
30 deaths compared to people of white ethnicity with HRs of 0.614 (95% CI 0.522 – 0.722, p<0.001) and  
31 0.575 (95% CI 0.435 – 0.759, p<0.001) respectively. In the complete cohort mortality risk was lower in  
32 the IMD quintile 4. More than two comorbidities were associated with an increasing HR and an increased  
33 HR of death compared to the reference eGFR range (90-119 ml/min) was seen with an eGFR  $\geq$ 120  
34 ml/min and  $\geq$ 45 ml/min. An eGFR of 60-89 ml/min was associated with a lower HR. In the analysis of  
35 those with ACR tested, an eGFR <60 ml/min was associated with progressively higher HR by CKD stage.  
36  
37

38  
39 In model 3 (all vascular comorbidities except CKD and the addition of eGFR and ACR, **Table 4**) the HR for  
40 death for people of South Asian ethnicity was 0.697 (95% CI 0.56 – 0.868, p=0.001) and for people of  
41 black ethnicity was 0.533 (95% CI 0.403 – 0.704, p<0.001) compared to people of white ethnicity (**Figure**  
42 **2**). Older age, male gender, being a current smoker and increasing comorbidity (two or more) were  
43 associated with an increased HR of death (**Figure 3**). An ACR of 'high' or greater (i.e.  $\geq$ 3.0 mg/mmol) and  
44 an eGFR <45 ml/min was also associated with an increased HR for death. No significant differences in HRs  
45 were observed between deprivation quintiles.  
46  
47  
48  
49  
50  
51  
52  
53  
54  
55  
56  
57  
58  
59  
60

Impact of CKD and comorbidity on mortality in a multi-ethnic population.

Table 4: Cox Proportional Hazard Regression Analysis. Multivariate (adjusted) analyses. Model 3.

|               |                             | ACR Tested Cohort                         |           |
|---------------|-----------------------------|-------------------------------------------|-----------|
|               |                             | Hazard Ratio<br>(95% Confidence Interval) | P value   |
| Ethnicity     | White                       | Reference Population <sub>1</sub>         | (<0.001*) |
|               | South Asian                 | 0.697 (0.56 - 0.868)                      | 0.001     |
|               | Black                       | 0.533 (0.403 - 0.704)                     | <0.001    |
| Age (years)   | 50 and under                | Reference Population <sub>1</sub>         | (<0.001*) |
|               | 51-60                       | 1.519 (0.907 - 2.546)                     | 0.112     |
|               | 61-70                       | 3.521 (2.17 - 5.712)                      | <0.001    |
|               | 71-80                       | 7.381 (4.61 - 11.818)                     | <0.001    |
|               | 81-90                       | 15.721 (9.534 - 25.922)                   | <0.001    |
|               | >90                         | 51.641 (27.889 - 95.621)                  | <0.001    |
| Gender        | Female as reference         | 1.782 (1.46 - 2.176)                      | <0.001    |
| Smoker        | Non-smoker as reference     | 1.886 (1.488 - 2.392)                     | <0.001    |
| IMD Rank      | Quintile 1 (least deprived) | <0.001 (<0.001 - >10 <sup>^5</sup> )      | 0.952     |
|               | Quintile 2                  | <0.001 (<0.001 - >10 <sup>^5</sup> )      | 0.913     |
|               | Quintile 3                  | 0.978 (0.68 - 1.387)                      | 0.902     |
|               | Quintile 4                  | 0.788 (0.585 - 1.062)                     | 0.118     |
|               | Quintile 5 (most deprived)  | Reference Population <sub>1</sub>         | [0.65*]   |
| Comorbidities | 0                           | Reference population <sub>1</sub>         | (<0.001*) |
|               | 1                           | 1.371 (0.932 - 2.016)                     | 0.109     |
|               | 2                           | 1.486 (1.019 - 2.166)                     | 0.039     |
|               | 3                           | 2.29 (1.53 - 3.428)                       | <0.001    |
|               | 4                           | 3.153 (2.002 - 4.964)                     | <0.001    |
|               | 5                           | 5.141 (2.869 - 9.212)                     | <0.001    |
|               | 6                           | 10.54 (2.52 - 44.084)                     | 0.001     |
| eGFR (ml/min) | >120                        | 1.396 (0.782 - 2.492)                     | 0.26      |
|               | 90-120                      | Reference Population <sub>1</sub>         | (<0.001*) |
|               | 60-89                       | 0.907 (0.982 - 1.207)                     | 0.505     |
|               | 45-59                       | 1.282 (0.932 - 1.763)                     | 0.126     |
|               | 30-44                       | 1.566 (1.095 - 2.239)                     | 0.014     |
|               | 15-29                       | 2.073 (1.315 - 3.268)                     | 0.002     |
| ACR (mg/mmol) | Optimal (<1.1)              | Reference Population <sub>1</sub>         | (<0.001*) |
|               | High Normal (1.1-2.99)      | 1.032 (0.784 - 1.359)                     | 0.821     |
|               | High (3.0-29.99)            | 1.837 (1.464 - 2.305)                     | <0.001    |
|               | Very High (30 - 200)        | 2.956 (2.132 - 4.099)                     | <0.001    |
|               | Nephrotic (>200)            | 3.838 (2.108 - 6.985)                     | <0.001    |

\* P-value for overall effect

Impact of CKD and comorbidity on mortality in a multi-ethnic population.

Figure 2. Cox Regression Survival Plot indicating cumulative survival—Differences between ethnicities in Model 3 (comorbidities, eGFR and ACR). Table below survival plot demonstrates number of individuals who remained in follow up at each time-point.

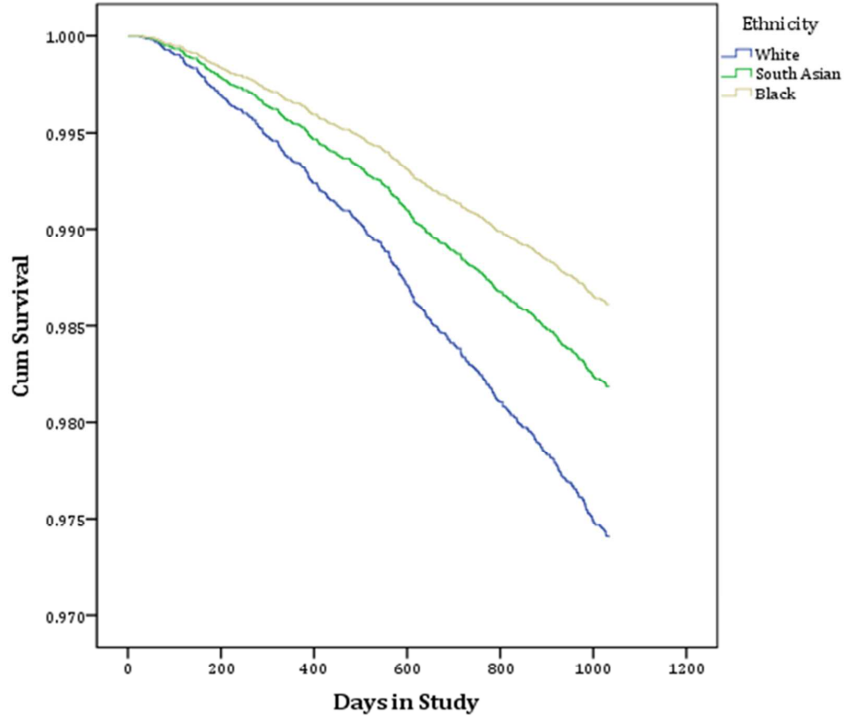

Formatted: Font: 9 pt

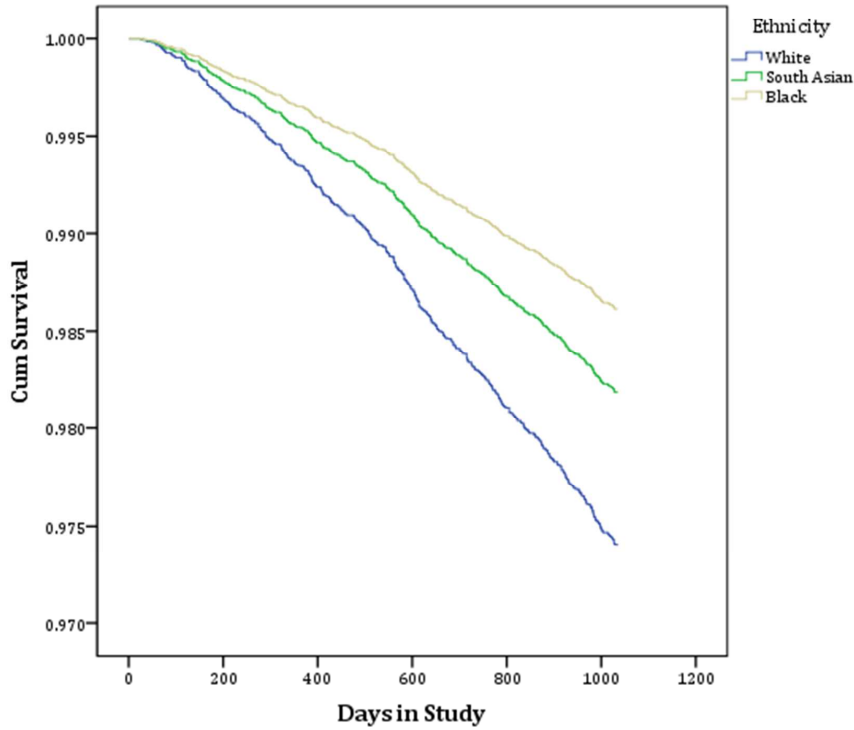

Formatted: Font: 8 pt

Impact of CKD and comorbidity on mortality in a multi-ethnic population.

Subjects still included during follow-up

|                    | <u>Number of Days</u> |              |              |              |              |              |              |
|--------------------|-----------------------|--------------|--------------|--------------|--------------|--------------|--------------|
|                    | <u>0</u>              | <u>200</u>   | <u>400</u>   | <u>600</u>   | <u>800</u>   | <u>1000</u>  | <u>end</u>   |
| <u>White</u>       | <u>1908</u>           | <u>1896</u>  | <u>1864</u>  | <u>1835</u>  | <u>1798</u>  | <u>1764</u>  | <u>1760</u>  |
| <u>South Asian</u> | <u>7022</u>           | <u>6981</u>  | <u>6938</u>  | <u>6891</u>  | <u>6840</u>  | <u>6783</u>  | <u>6775</u>  |
| <u>Black</u>       | <u>2275</u>           | <u>2266</u>  | <u>2251</u>  | <u>2228</u>  | <u>2208</u>  | <u>2192</u>  | <u>2191</u>  |
| <u>All</u>         | <u>11205</u>          | <u>11143</u> | <u>11053</u> | <u>10954</u> | <u>10846</u> | <u>10739</u> | <u>10726</u> |

- Formatted ... [1]
- Formatted: Font: Cambria, 10 pt, Not Italic
- Formatted: Font: Cambria, 10 pt
- Formatted ... [2]
- Formatted ... [3]
- Formatted ... [4]
- Formatted ... [5]
- Formatted ... [6]
- Formatted ... [7]
- Formatted ... [8]
- Formatted: Font: Cambria, 10 pt
- Formatted ... [9]
- Formatted ... [10]
- Formatted ... [11]
- Formatted ... [12]
- Formatted ... [13]
- Formatted ... [14]
- Formatted ... [15]
- Formatted ... [16]
- Formatted ... [17]
- Formatted ... [18]
- Formatted ... [19]
- Formatted ... [20]
- Formatted ... [21]
- Formatted ... [22]
- Formatted ... [23]
- Formatted ... [24]
- Formatted ... [25]
- Formatted ... [26]
- Formatted ... [27]
- Formatted ... [28]
- Formatted ... [29]
- Formatted ... [30]
- Formatted ... [31]
- Formatted ... [32]
- Formatted ... [33]
- Formatted ... [34]
- Formatted ... [35]
- Formatted ... [36]
- Formatted ... [37]
- Formatted ... [38]
- Formatted ... [39]
- Formatted ... [40]

Impact of CKD and comorbidity on mortality in a multi-ethnic population.

Figure 3. Hazard ratio (HR) for death by number of comorbidities. Multivariate (adjusted) analysis: Model 3

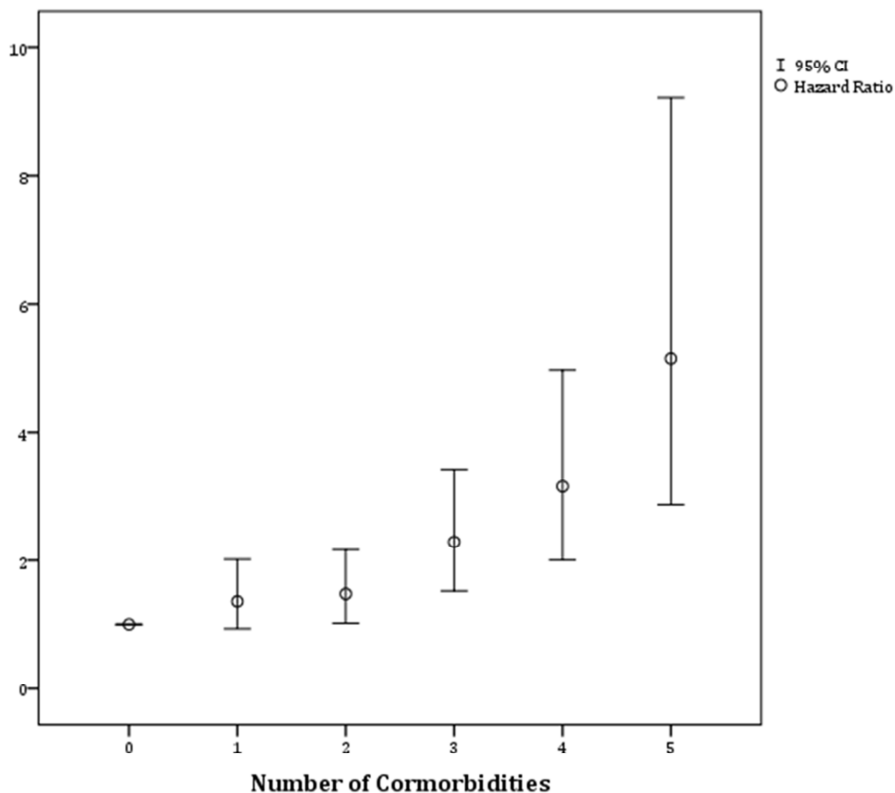

HR not illustrated for 6 comorbidities; HR 10.54 (95% CI 2.52 - 44.084)

Impact of CKD and comorbidity on mortality in a multi-ethnic population.

## Discussion

This study utilised routinely available clinical and laboratory data, including kidney function assessed by eGFR and ACR, from a large primary care population. We included in the analysis detailed socio-economic status (SES) and, importantly, studied three ethnic groups, South-Asian, black and white. Prior to this research, there has been uncertainty about the impact of ethnicity and SES on clinical outcomes in people with significant comorbidities including CKD. The comprehensive nature of the dataset coupled with the ability to utilise the Primary Care Mortality Database has allowed us to assess the relative impact of these factors on survival.

We found that previous associations between lower eGFR and higher ACR and increased mortality applied to this population. Furthermore, these associations remained significant when adjusted for ethnicity, age, gender, cardiovascular risk factors and SES. These results add weight to the risk stratification benefit of measuring ACR has in high risk groups.

A strong cumulative impact of comorbidity on CKD and ethnicity was shown. Whereas traditional comorbidity scores such as the Charlson Comorbidity Index [36] are difficult to calculate accurately in a large primary care setting, our study demonstrates that a simple cumulative score can be used to risk stratify provides prognostic information. Individual comorbidities were present in varying frequencies within different ethnic groups, a finding echoed in other consistent with that found in other ethnically diverse populations [37], [37]. Whilst they were individual comorbidities were associated with different mortality risks, we found the cumulative effect of comorbidities conveyed the greatest prognostic implication. A similar approach, but also including non-cardiovascular risk factors has recently been described [38], [38]. Our study demonstrates suggests that routinely collected clinical data concerning cumulative comorbidity can may be utilised to quantify risk, however and further work would be required to validate this as a develop such a risk stratification tool is underway tool for use in clinical care. Potential implications for this include identifying (and targeting) those at the highest risk.

SES was measured by the IMD 2007 score; a cumulative deprivation index score incorporating seven areas of deprivation which has been validated as superior to other deprivation scores [31], [31]. One notable finding is that we did not demonstrate any association between mortality when corrected for all other factors including comorbidity and ethnicity. This This is not consistent with with a number of several other studies, which have shown that there is an independent relationship between SES and mortality and this applies across disease states and ethnic groups within the UK [39-42], [39-42]. This relationship varies by population group studied, [43] and there have been limited studies investigating health disparities in similar, inner-city populations. Whilst we studied a health care system that is free at the point of care, limiting possible health access issues, the majority of individuals were from the most deprived national quintile and our study may therefore underestimate the influence of the complete spectrum of SES on mortality. To attempt to correct for this, Whilst we studied a health care system that is free at the point of care, limiting possible health access issues, the majority of individuals were from the most deprived national quintile. We therefore re-ran the analyses dividing the cohort into equal

Formatted: Font: Bold

Formatted: Font: Bold

Impact of CKD and comorbidity on mortality in a multi-ethnic population.

quintiles. All analyses continued to indicate the effect of ethnicity and the importance of cardiovascular comorbidity and renal function. The univariate analysis (**Supplementary Table II**) and the most comprehensive multivariate analysis (Model 3, **Supplementary Table III**) did not show any differences between most and least deprived quintiles.

One of the seven areas included in the IMD is health deprivation, raising the possibility of an inbuilt relationship between ~~and~~ deprivation and health even before analyses are undertaken. The possible implication of this was investigated by Adams and White [44] who analysed data having removed the health domain from IMD 2004 and found that its removal had little, practical, effect. This suggests the presence of the health domain is unlikely to influence our result.

We found that the risk of death was lower for people of South Asian and black ethnicity compared to people of white ethnicity, and this remained in all analyses (adjusted and unadjusted) performed. Previous studies comparing the outcomes of different ethnic groups have been limited in their generalizability. They have either looked at disease specific mortality [8, 18, 20, 21] or have been based in populations that do not have access to free comprehensive healthcare. The finding that differences in mortality risk between ethnic groups is independent of age, gender, SES, kidney function and comorbidities requires further work. ~~There may be other external factors/variables, such as health promotion targeted at specific groups, differences in medication usage or which can explain this risk or factors related to genetic diversity which may require genome wide studies to elucidate may offer potential explanations for this variation.~~ [45, 46]

A major strength in this study is the sample size, which included sixty-two practices of varying list size and number of practitioners. Ethnicity was documented in over 80% of the population studied; this is, much higher than normally found in primary care records [47]. ~~Self-reporting is considered the 'gold standard' method of assessing ethnicity [27]. [27] taking into account an individual's culture and self-identity.~~ Renal function was described in terms of eGFR and ACR, the latter becoming of increased prominence in the stratification of cardiovascular risk.

Our analyses have used data from primary care coding and recording systems, which formed part of the electronic downloads. ~~These downloads indicate who is on a specific cardiovascular risk register and therefore may not classify people correctly.~~ There is a relative paucity of published literature regarding the correct identification of people onto the correct risk registers [23, 48] [49, 50]. Surrogate measures of accuracy of the data include previous studies looking at gaming for QOF points (falsely classifying people with conditions they do not have thereby increasing revenue) or exception reporting (excluding individuals who have not had the appropriate monitoring completed) suggest that both these are rare [23, 51, 52] [23, 51, 52]

~~When comparing the breakdown of the population studied in these analyses to the source population, it is important to highlight two key differences. Firstly, there is a relative underrepresentation of individuals of white ethnicity, consistent with previous research [53]. [53] This is most marked in those who had their~~

Formatted: Font: Bold

Formatted: Highlight

Formatted: Font: Bold

Formatted: Font: Bold

Formatted: Font: Bold



Impact of CKD and comorbidity on mortality in a multi-ethnic population.

ACR measured; ~~d~~ as a higher number of males and individuals with diabetes or of South Asian descent ethnicity had an ACR performed measured. Comparing the whole cohort to those who had their ACR reported showed similar trends for mortality were observed for in respect of age distribution, eGFR, smoking status and deprivation SES, suggests a generalizability of results. Additionally, Secondly one criterion for inclusion was the recording of renal function within the previous twelve months. This is likely to have resulted in an overrepresentation of comorbidity as people with CV conditions would be more likely to have their renal function checked. A further consideration is that the accuracy and applicability of creatinine based eGFR equations, such as the formula used in this analysis, in non-white ethnic groups is a subject of ongoing research.<sup>[54-56]</sup>,<sup>[54-56]</sup> Cystatin based equations may be more accurate.<sup>[57]</sup>,<sup>[57]</sup> but are not routinely measured in clinical practice.

Formatted: Font: +Body (Cambria)

Formatted: Font: +Body (Cambria)

Not all individuals had their ACR measured and the percentage varied between ethnic groups, one of the limitations of retrospective, population-based analyses. A higher number of males and individuals with diabetes or of South Asian descent had an ACR performed.<sup>53</sup> However, similar trends for mortality were observed for age distribution, eGFR, smoking status and deprivation, suggesting generalizability of results.

Formatted: Font: Bold

The accuracy and applicability of creatinine based estimated GFR equations, such as the formula used in this analysis, in non-white ethnic groups is a subject of ongoing research.<sup>54-56</sup> Cystatin based equations may be more accurate.<sup>57</sup>, but are not available for use with routinely recorded data.

Formatted: Font: Bold

Formatted: Font: Bold

Formatted: Font: English (U.S.)

In summary, we have shown the determinants of mortality were multifactorial in a high risk population and that ethnicity should be considered as a non-traditional risk factor for mortality; the HR for death was lower for South Asian and black individuals compared to white individuals which was, in part, independent of age, gender, SES, renal function and comorbidities. Furthermore, a simple cumulative comorbidity system may have prognostic utility. Renal function (eGFR and ACR) provides additional information and gender, age and smoking status remain significant risk factors for mortality.

1  
2  
3  
4 Impact of CKD and comorbidity on mortality in a multi-ethnic population.  
5

6  
7 **Acknowledgements**

8 none  
9

10  
11 **Competing Interests**

12 Mark Jesky has received funding from JABBS foundation

13 AC Felix Burden has advised and received honoraria from Enhanced Healthcare Services Ltd  
14

15  
16 **Funding**

17 This research received no specific grant from any funding agency in the public, commercial or not-for-  
18 profit sectors  
19  
20  
21  
22  
23  
24  
25  
26  
27  
28  
29  
30  
31  
32  
33  
34  
35  
36  
37  
38  
39  
40  
41  
42  
43  
44  
45  
46  
47  
48  
49  
50  
51  
52  
53  
54  
55  
56  
57  
58  
59  
60

Impact of CKD and comorbidity on mortality in a multi-ethnic population.

#### References

1. Go AS, Chertow GM, Fan D, et al. Chronic kidney disease and the risks of death, cardiovascular events, and hospitalization. *The New England journal of medicine* 2004;**351**(13):1296-305 doi: 10.1056/NEJMoa041031[published Online First: Epub Date]].
2. Matsushita K, van der Velde M, Astor BC, et al. Association of estimated glomerular filtration rate and albuminuria with all-cause and cardiovascular mortality in general population cohorts: a collaborative meta-analysis. *Lancet* 2010;**375**(9731):2073-81 doi: 10.1016/S0140-6736(10)60674-5[published Online First: Epub Date]].
3. Astor BC, Matsushita K, Gansevoort RT, et al. Lower estimated glomerular filtration rate and higher albuminuria are associated with mortality and end-stage renal disease. A collaborative meta-analysis of kidney disease population cohorts. *Kidney international* 2011;**79**(12):1331-40 doi: 10.1038/ki.2010.550[published Online First: Epub Date]].
4. Gansevoort RT, Matsushita K, van der Velde M, et al. Lower estimated GFR and higher albuminuria are associated with adverse kidney outcomes. A collaborative meta-analysis of general and high-risk population cohorts. *Kidney international* 2011;**80**(1):93-104 doi: 10.1038/ki.2010.531[published Online First: Epub Date]].
5. Zhang QL, Rothenbacher D. Prevalence of chronic kidney disease in population-based studies: systematic review. *BMC Public Health* 2008;**8**:117 doi: 10.1186/1471-2458-8-117[published Online First: Epub Date]].
6. Coresh J, Selvin E, Stevens LA, et al. Prevalence of chronic kidney disease in the United States. *Jama* 2007;**298**(17):2038-47 doi: 10.1001/jama.298.17.2038[published Online First: Epub Date]].
7. Peralta CA, Katz R, Deboer I, et al. Racial and Ethnic Differences in Kidney Function Decline among Persons without Chronic Kidney Disease. *J Am Soc Nephrol* 2011;**22**(7):1327-34 doi: 10.1681/ASN.2010090960[published Online First: Epub Date]].
8. Barbour SJ, Er L, Djurdjev O, et al. Differences in progression of CKD and mortality amongst Caucasian, Oriental Asian and South Asian CKD patients. *Nephrol Dial Transplant* 2010;**25**(11):3663-72 doi: 10.1093/ndt/gfq189[published Online First: Epub Date]].
9. Choi AI, Rodriguez RA, Bacchetti P, et al. White/black racial differences in risk of end-stage renal disease and death. *Am J Med* 2009;**122**(7):672-8 doi: 10.1016/j.amjmed.2008.11.021[published Online First: Epub Date]].
10. Crews DC, Sozio SM, Liu Y, et al. Inflammation and the paradox of racial differences in dialysis survival. *J Am Soc Nephrol* 2011;**22**(12):2279-86 doi: 10.1681/ASN.2011030305[published Online First: Epub Date]].
11. Hallan SI, Matsushita K, Sang Y, et al. Age and association of kidney measures with mortality and end-stage renal disease. *JAMA : the journal of the American Medical Association* 2012;**308**(22):2349-60 doi: 10.1001/jama.2012.16817[published Online First: Epub Date]].
12. Herzog CA, Asinger RW, Berger AK, et al. Cardiovascular disease in chronic kidney disease. A clinical update from Kidney Disease: Improving Global Outcomes (KDIGO). *Kidney Int* 2011;**80**(6):572-86 doi: 10.1038/ki.2011.223[published Online First: Epub Date]].
13. Mahmoodi BK, Matsushita K, Woodward M, et al. Associations of kidney disease measures with mortality and end-stage renal disease in individuals with and without hypertension: a meta-analysis. *Lancet* 2012;**380**(9854):1649-61 doi: 10.1016/S0140-6736(12)61272-0[published Online First: Epub Date]].
14. Benjamin EJ, Wolf PA, D'Agostino RB, et al. Impact of atrial fibrillation on the risk of death: the Framingham Heart Study. *Circulation* 1998;**98**(10):946-52
15. Ford ES. Trends in mortality from all causes and cardiovascular disease among hypertensive and nonhypertensive adults in the United States. *Circulation* 2011;**123**(16):1737-44 doi: 10.1161/CIRCULATIONAHA.110.005645[published Online First: Epub Date]].
16. Afkarian M, Sachs MC, Kestenbaum B, et al. Kidney disease and increased mortality risk in type 2 diabetes. *J Am Soc Nephrol* 2013;**24**(2):302-8 doi: 10.1681/ASN.2012070718[published Online First: Epub Date]].

Impact of CKD and comorbidity on mortality in a multi-ethnic population.

17. Bahrami H, Kronmal R, Bluemke DA, et al. Differences in the incidence of congestive heart failure by ethnicity: the multi-ethnic study of atherosclerosis. *Arch Intern Med* 2008;**168**(19):2138-45 doi: 10.1001/archinte.168.19.2138[published Online First: Epub Date]].
18. Balarajan R. Ethnic differences in mortality from ischaemic heart disease and cerebrovascular disease in England and Wales. *Bmj* 1991;**302**(6776):560-4
19. Cappuccio FP. Ethnicity and cardiovascular risk: variations in people of African ancestry and South Asian origin. *J Hum Hypertens* 1997;**11**(9):571-6
20. Khan NA, Wang H, Anand S, et al. Ethnicity and sex affect diabetes incidence and outcomes. *Diabetes Care* 2011;**34**(1):96-101 doi: 10.2337/dc10-0865[published Online First: Epub Date]].
21. Chaturvedi N, Jarrett J, Morrish N, et al. Differences in mortality and morbidity in African Caribbean and European people with non-insulin dependent diabetes mellitus: results of 20 year follow up of a London cohort of a multinational study. *Bmj* 1996;**313**(7061):848-52
22. Shekelle P. New contract for general practitioners. *Bmj* 2003;**326**(7387):457-8 doi: 10.1136/bmj.326.7387.457[published Online First: Epub Date]].
23. Calvert M, Shankar A, McManus RJ, et al. Effect of the quality and outcomes framework on diabetes care in the United Kingdom: retrospective cohort study. *Bmj* 2009;**338**:b1870 doi: 10.1136/bmj.b1870[published Online First: Epub Date]].
24. PEEG, Current Estimates, Population Estimates by Ethnic Group Mid-2002-2008 for Primary Care Organisations (experimental). Secondary PEEG, Current Estimates, Population Estimates by Ethnic Group Mid-2002-2008 for Primary Care Organisations (experimental) 02/03/2009 2008. <http://www.ons.gov.uk/ons/taxonomy/index.html?nscl=Population+Estimates+by+Ethnic+Group>.
25. National Institute for Health and Clinical Excellence: CG73: Chronic Kidney Disease. Secondary National Institute for Health and Clinical Excellence: CG73: Chronic Kidney Disease 2008. <http://www.nice.org.uk/CG73>.
26. Centre HaSCI. Quality and Outcomes Framework. Secondary Quality and Outcomes Framework. [www.hscic.gov.uk/qof](http://www.hscic.gov.uk/qof).
27. Saunders CL, Abel GA, El Turabi A, et al. Accuracy of routinely recorded ethnic group information compared with self-reported ethnicity: evidence from the English Cancer Patient Experience survey. *BMJ Open* 2013;**3**(6) doi: 10.1136/bmjopen-2013-002882[published Online First: Epub Date]].
28. Levey AS, Bosch JP, Lewis JB, et al. A more accurate method to estimate glomerular filtration rate from serum creatinine: a new prediction equation. Modification of Diet in Renal Disease Study Group. *Ann Intern Med* 1999;**130**(6):461-70
29. Index of Multiple Deprivation (IMD) 2007. Secondary Index of Multiple Deprivation (IMD) 2007 26/1/2013 2007. [http://data.gov.uk/dataset/index\\_of\\_multiple\\_deprivation\\_imd\\_2007](http://data.gov.uk/dataset/index_of_multiple_deprivation_imd_2007).
30. Townsend P, Phillimore P, Beattie A. *Health and deprivation: inequality and the north*. London: Croom Helm, 1988.
31. Jordan H, Roderick P, Martin D. The Index of Multiple Deprivation 2000 and accessibility effects on health. *J Epidemiol Community Health* 2004;**58**(3):250-7
32. Centre HSCI. Primary Care Mortality Database. Secondary Primary Care Mortality Database. <http://www.hscic.gov.uk/pcmdatabase>.
33. Levey AS, de Jong PE, Coresh J, et al. The definition, classification, and prognosis of chronic kidney disease: a KDIGO Controversies Conference report. *Kidney Int* 2011;**80**(1):17-28 doi: 10.1038/ki.2010.483[published Online First: Epub Date]].
34. Abbasi A, Peelen LM, Corpeleijn E, et al. Prediction models for risk of developing type 2 diabetes: systematic literature search and independent external validation study. *Bmj* 2012;**345**:e5900 doi: 10.1136/bmj.e5900[published Online First: Epub Date]].

Impact of CKD and comorbidity on mortality in a multi-ethnic population.

35. Smith S, Waterall J, Burden AC. An evaluation of the performance of the NHS Health Check programme in identifying people at high risk of developing type 2 diabetes. *BMJ Open* 2013;**3**(3) doi: 10.1136/bmjopen-2012-002219[published Online First: Epub Date]].
36. Charlson ME, Pompei P, Ales KL, et al. A new method of classifying prognostic comorbidity in longitudinal studies: development and validation. *J Chronic Dis* 1987;**40**(5):373-83
37. Khunti K, Morris DH, Weston CL, et al. Joint prevalence of diabetes, impaired glucose regulation, cardiovascular disease risk and chronic kidney disease in South Asians and White Europeans. *PLoS One* 2013;**8**(1):e55580 doi: 10.1371/journal.pone.0055580[published Online First: Epub Date]].
38. Carey IM, Shah SM, Harris T, et al. A new simple primary care morbidity score predicted mortality and better explains between practice variations than the Charlson index. *J Clin Epidemiol* 2013;**66**(4):436-44 doi: 10.1016/j.jclinepi.2012.10.012[published Online First: Epub Date]].
39. Johnson-Lawrence V, Kaplan G, Galea S. Socioeconomic mobility in adulthood and cardiovascular disease mortality. *Ann Epidemiol* 2013;**23**(4):167-71 doi: 10.1016/j.annepidem.2013.02.004[published Online First: Epub Date]].
40. Lazzarino AI, Hamer M, Stamatakis E, et al. The combined association of psychological distress and socioeconomic status with all-cause mortality: a national cohort study. *JAMA Intern Med* 2013;**173**(1):22-7 doi: 10.1001/2013.jamainternmed.951[published Online First: Epub Date]].
41. Jackson CA, Jones NR, Walker JJ, et al. Area-based socioeconomic status, type 2 diabetes and cardiovascular mortality in Scotland. *Diabetologia* 2012;**55**(11):2938-45 doi: 10.1007/s00125-012-2667-1[published Online First: Epub Date]].
42. Gallo V, Mackenbach JP, Ezzati M, et al. Social inequalities and mortality in Europe--results from a large multi-national cohort. *PLoS One* 2012;**7**(7):e39013 doi: 10.1371/journal.pone.0039013[published Online First: Epub Date]].
43. Levene LS, Bankart J, Khunti K, et al. Association of primary care characteristics with variations in mortality rates in England: an observational study. *PLoS One* 2012;**7**(10):e47800 doi: 10.1371/journal.pone.0047800[published Online First: Epub Date]].
44. Adams J, White M. Removing the health domain from the Index of Multiple Deprivation 2004-effect on measured inequalities in census measure of health. *J Public Health (Oxf)* 2006;**28**(4):379-83 doi: 10.1093/pubmed/fdl061[published Online First: Epub Date]].
45. Conley J, Tonelli M, Quan H, et al. Association Between GFR, Proteinuria, and Adverse Outcomes Among White, Chinese, and South Asian Individuals in Canada. *Am J Kidney Dis* 2011 doi: 10.1053/j.ajkd.2011.09.022[published Online First: Epub Date]].
46. Buckalew VM, Jr., Freedman BI. Reappraisal of the impact of race on survival in patients on dialysis. *Am J Kidney Dis* 2010;**55**(6):1102-10 doi: 10.1053/j.ajkd.2009.10.062[published Online First: Epub Date]].
47. Raleigh VS. Collection of data on ethnic origin in England. *Bmj* 2008;**337**:a1107 doi: 10.1136/bmj.a1107[published Online First: Epub Date]].
48. Lambert AM, Burden AC, Chambers J, et al. Cardiovascular screening for men at high risk in Heart of Birmingham Teaching Primary Care Trust: the 'Deadly Trio' programme. *J Public Health (Oxf)* 2011 doi: 10.1093/pubmed/fdr052[published Online First: Epub Date]].
49. Humphreys J, Harvey G, Coleiro M, et al. A collaborative project to improve identification and management of patients with chronic kidney disease in a primary care setting in Greater Manchester. *BMJ Qual Saf* 2012;**21**(8):700-8 doi: 10.1136/bmjqs-2011-000664[published Online First: Epub Date]].
50. Martin D, Wright JA. Disease prevalence in the English population: a comparison of primary care registers and prevalence models. *Soc Sci Med* 2009;**68**(2):266-74 doi: 10.1016/j.socscimed.2008.10.021[published Online First: Epub Date]].

1  
2  
3  
4 Impact of CKD and comorbidity on mortality in a multi-ethnic population.  
5  
6

- 7 51. Doran T, Fullwood C, Reeves D, et al. Exclusion of patients from pay-for-performance targets  
8 by English physicians. *N Engl J Med* 2008;**359**(3):274-84 doi:  
9 10.1056/NEJMsa0800310[published Online First: Epub Date]].  
10 52. Campbell S, Hannon K, Lester H. Exception reporting in the Quality and Outcomes  
11 Framework: views of practice staff - a qualitative study. *Br J Gen Pract*  
12 2011;**61**(585):183-9 doi: 10.3399/bjgp11X567117[published Online First: Epub Date]].  
13 53. de Lusignan S, Nitsch D, Belsey J, et al. Disparities in testing for renal function in UK primary  
14 care: cross-sectional study. *Fam Pract* 2011 doi: 10.1093/fampra/cmr036[published  
15 Online First: Epub Date]].  
16 54. Delanaye P, Cavalier E, Mariat C, et al. Estimating glomerular filtration rate in Asian subjects:  
17 where do we stand? *Kidney Int* 2011;**80**(5):439-40 doi: 10.1038/ki.2011.197[published  
18 Online First: Epub Date]].  
19 55. Delanaye P, Mariat C, Maillard N, et al. Are the creatinine-based equations accurate to  
20 estimate glomerular filtration rate in African American populations? *Clin J Am Soc*  
21 *Nephrol* 2011;**6**(4):906-12 doi: 10.2215/CJN.10931210[published Online First: Epub  
22 Date]].  
23 56. Matsushita K, Mahmoodi BK, Woodward M, et al. Comparison of risk prediction using the  
24 CKD-EPI equation and the MDRD study equation for estimated glomerular filtration rate.  
25 *Jama* 2012;**307**(18):1941-51 doi: 10.1001/jama.2012.3954[published Online First:  
26 Epub Date]].  
27 57. Teo BW, Xu H, Wang D, et al. Estimating glomerular filtration rates by use of both cystatin C  
28 and standardized serum creatinine avoids ethnicity coefficients in Asian patients with  
29 chronic kidney disease. *Clin Chem* 2012;**58**(2):450-7 doi:  
30 10.1373/clinchem.2011.172346[published Online First: Epub Date]].  
31  
32  
33  
34  
35  
36  
37  
38  
39  
40  
41  
42  
43  
44  
45  
46  
47  
48  
49  
50  
51  
52  
53  
54  
55  
56  
57  
58  
59  
60

8/16/2013 3:35:00 PM

1  
2  
3  
4  
5  
6  
7  
8  
9  
10  
11  
12  
13  
14  
15  
16  
17  
18  
19  
20  
21  
22  
23  
24  
25  
26  
27  
28  
29  
30  
31  
32  
33  
34  
35  
36  
37  
38  
39  
40  
41  
42  
43  
44  
45  
46  
47  
48  
49  
50  
51  
52  
53  
54  
55  
56  
57  
58  
59  
60

8/16/2013 3:35:00 PM

For peer review only

8/16/2013 3:35:00 PM

For peer review only

1  
2  
3  
4  
5  
6  
7  
8  
9  
10  
11  
12  
13  
14  
15  
16  
17  
18  
19  
20  
21  
22  
23  
24  
25  
26  
27  
28  
29  
30  
31  
32  
33  
34  
35  
36  
37  
38  
39  
40  
41  
42  
43  
44  
45  
46  
47  
48  
49  
50  
51  
52  
53  
54  
55  
56  
57  
58  
59  
60



8/16/2013 3:35:00 PM

1  
2  
3  
4  
5  
6  
7  
8  
9  
10  
11  
12  
13  
14  
15  
16  
17  
18  
19  
20  
21  
22  
23  
24  
25  
26  
27  
28  
29  
30  
31  
32  
33  
34  
35  
36  
37  
38  
39  
40  
41  
42  
43  
44  
45  
46  
47  
48  
49  
50  
51  
52  
53  
54  
55  
56  
57  
58  
59  
60

8/16/2013 3:35:00 PM

For peer review only

8/16/2013 3:35:00 PM

For peer review only

1  
2  
3  
4  
5  
6  
7  
8  
9  
10  
11  
12  
13  
14  
15  
16  
17  
18  
19  
20  
21  
22  
23  
24  
25  
26  
27  
28  
29  
30  
31  
32  
33  
34  
35  
36  
37  
38  
39  
40  
41  
42  
43  
44  
45  
46  
47  
48  
49  
50  
51  
52  
53  
54  
55  
56  
57  
58  
59  
60

8/16/2013 3:35:00 PM

1  
2  
3  
4  
5  
6  
7  
8  
9  
10  
11  
12  
13  
14  
15  
16  
17  
18  
19  
20  
21  
22  
23  
24  
25  
26  
27  
28  
29  
30  
31  
32  
33  
34  
35  
36  
37  
38  
39  
40  
41  
42  
43  
44  
45  
46  
47  
48  
49  
50  
51  
52  
53  
54  
55  
56  
57  
58  
59  
60

8/16/2013 3:35:00 PM

For peer review only

1  
2  
3  
4  
5  
6  
7  
8  
9  
10  
11  
12  
13  
14  
15  
16  
17  
18  
19  
20  
21  
22  
23  
24  
25  
26  
27  
28  
29  
30  
31  
32  
33  
34  
35  
36  
37  
38  
39  
40  
41  
42  
43  
44  
45  
46  
47  
48  
49  
50  
51  
52  
53  
54  
55  
56  
57  
58  
59  
60

For peer review only
